# Supplementary material for: Adult skull bone marrow is an expanding and resilient haematopoietic reservoir
Source: PubMed Central journal article supplement (PMC11618084; doi:10.1038/s41586-024-08163-9), 2024-11-13

# Adult skull bone marrow is an expanding and resilient hematopoietic reservoir

Bong Ihn Koh<sup>1,#</sup>, Vishal Mohanakrishnan<sup>1</sup>, Hyun-Woo Jeong<sup>2</sup>, Hongryeol Park<sup>1</sup>, Kai Kruse<sup>3</sup>, Young Jun Choi<sup>4</sup>, Melina Nieminen-Kelhä<sup>5</sup>, Rahul Kumar<sup>6</sup>, Raquel S. Pereira<sup>7</sup>, , Susanne Adams<sup>1</sup>, Hyuek Jong Lee<sup>8</sup>, M. Gabriele Bixel<sup>1</sup>, Peter Vajkoczy<sup>5</sup>, Daniela S. Krause<sup>6</sup>, Ralf H. Adams<sup>1,#</sup>

## Supplementary Data File 1

Flow cytometric analyses of skull or femur BM in aging, pregnancy, stroke, CML, PTH treatment, Young *versus* Old transplantation, PGE2 treatment, AMD3100 treatment, *pLIVE-Vegfa* overexpression and DC101 treatment

## Table of contents

Flow Cytometric Analysis of Aging Skull BM

Flow Cytometric Analysis of Aging Femur BM

Flow Cytometric Analysis of Skull BM in Pregnancy

Flow Cytometric Analysis of Femur BM in Pregnancy

Flow Cytometric Analysis of Skull BM in Stroke

Flow Cytometric Analysis of Femur BM in Stroke

Flow Cytometric Analysis of Skull BM in Chronic Myeloid Leukemia (CML)

Flow Cytometric Analysis of Femur BM in Chronic Myeloid Leukemia (CML)

Flow Cytometric Analysis of Skull BM after PTH Treatment

Flow Cytometric Analysis of Femur BM after PTH Treatment

Flow Cytometric Analysis of Skull BM after Young *versus* Old Donor Transplantation

Flow Cytometric Analysis of Femur BM after Young *versus* Old Donor Transplantation

Flow Cytometric Analysis of Skull BM after PGE2 Treatment

Flow Cytometric Analysis of Femur BM after PGE2 Treatment

Flow Cytometric Analysis of Skull BM after AMD3100 Treatment

Flow Cytometric Analysis of Femur BM after AMD3100 Treatment

Flow Cytometric Analysis of Skull BM with *pLIVE-Vegfa* Overexpression

Flow Cytometric Analysis of Femur BM with *pLIVE-Vegfa* Overexpression

Flow Cytometric Analysis of Skull BM after DC101 Treatment

Flow Cytometric Analysis of Femur BM after DC101 Treatment

# Adult skull bone marrow is an expanding and resilient hematopoietic reservoir

Bong Ihn Koh<sup>1,#</sup>, Vishal Mohanakrishnan<sup>1</sup>, Hyun-Woo Jeong<sup>2</sup>, Hongryeol Park<sup>1</sup>, Kai Kruse<sup>3</sup>, Young Jun Choi<sup>4</sup>, Melina Nieminen-Kelhä<sup>5</sup>, Rahul Kumar<sup>6</sup>, Raquel S. Pereira<sup>7</sup>, , Susanne Adams<sup>1</sup>, Hyuek Jong Lee<sup>8</sup>, M. Gabriele Bixel<sup>1</sup>, Peter Vajkoczy<sup>5</sup>, Daniela S. Krause<sup>6</sup>, Ralf H. Adams<sup>1,#</sup>

## Supplementary Data File 1

### Abbreviations

EC: Endothelial Cell

Emcn<sup>Hi</sup>: Endomucin-High

LT-HSC: Long-Term Hematopoietic Stem Cell

ST-HSC: Short-Term Hematopoietic Stem Cell

MPP2: Multi-Potent Progenitor 2

MPP3: Multi-Potent Progenitor 3

LSK: Lin<sup>-</sup> Sca1<sup>+</sup> cKit<sup>+</sup>

CLP: Common Lymphoid Progenitor

CMP: Common Myeloid Progenitor

GMP: Granulocyte-Monocyte Progenitor

MEP: Megakaryocyte-Erythrocyte Progenitor

MkP: Megakaryocyte Progenitor

Pre-GM: Pre-Granulocyte-Monocyte

Pre-CFU-E: Pre-Colony-Forming Unit-Erythroid

Pre-Meg-E: Pre-Megakaryocyte-Erythroid

CFU-E: Colony-Forming Unit-Erythroid

Pro-Ery: Pro-Erythroid

# Flow Cytometric Analysis of Aging Skull BM: Young (Y), Middle-Aged (M), Old (O), Geriatric (G)

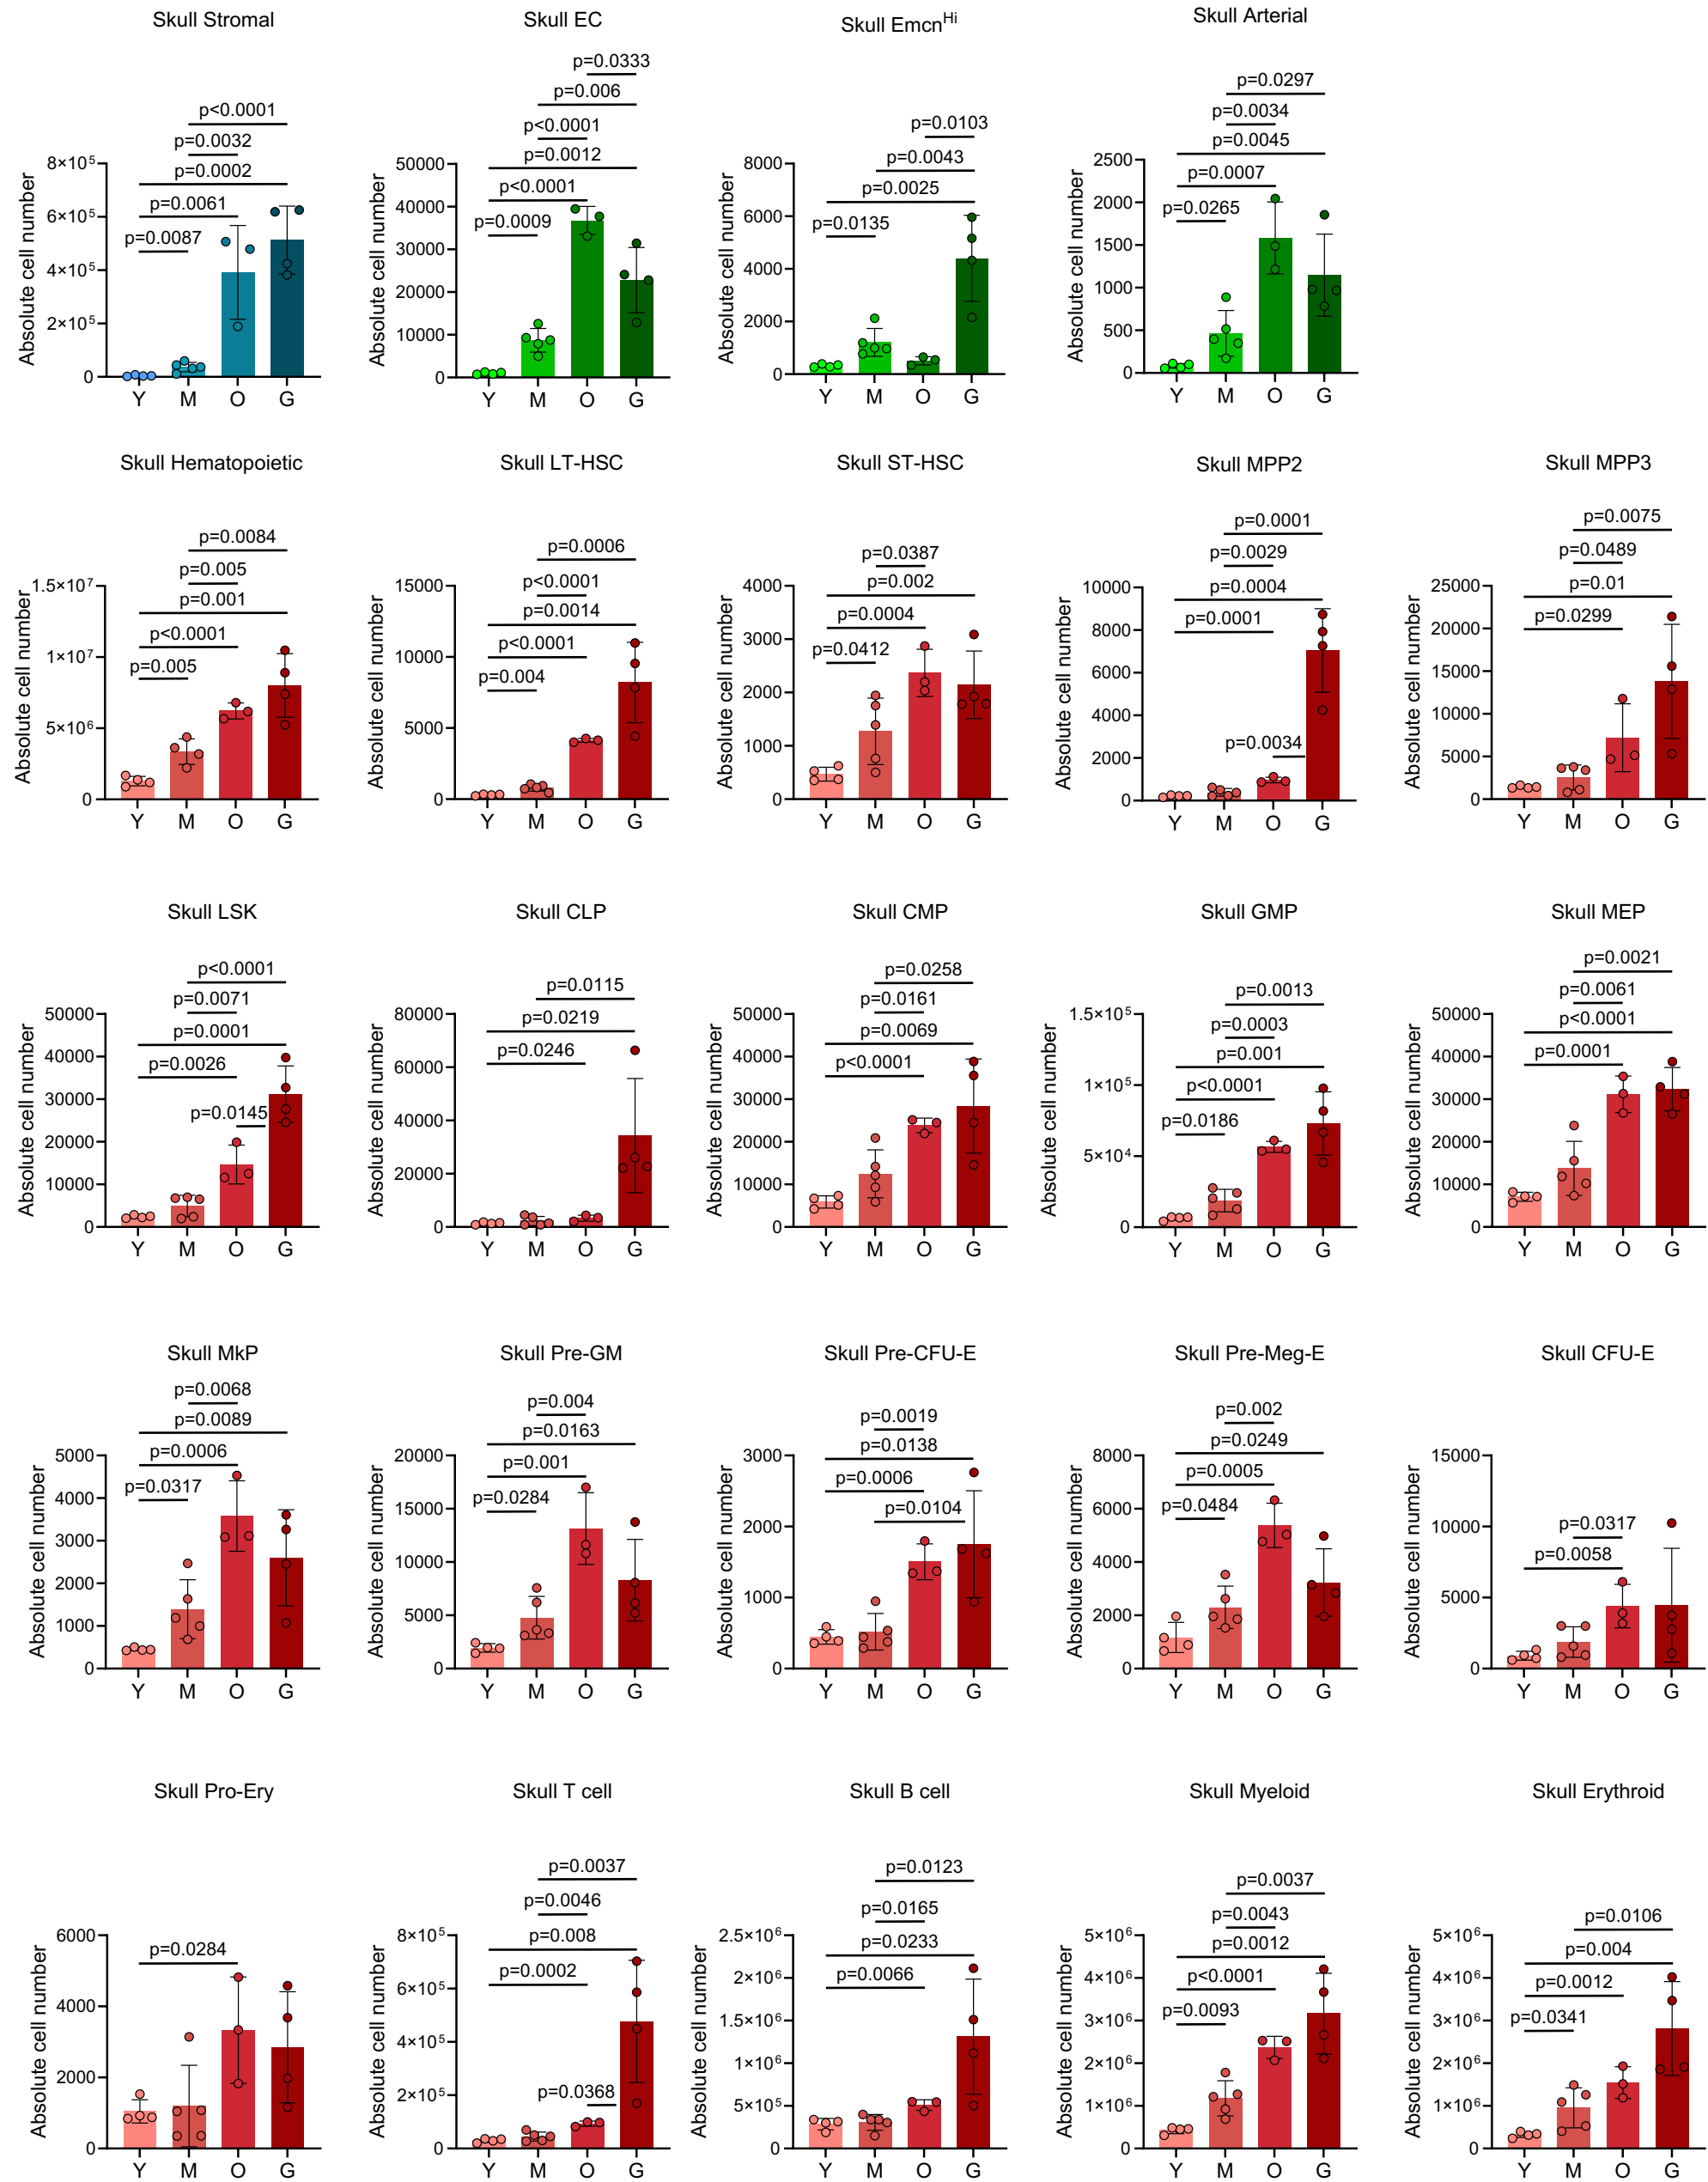

# Flow Cytometric Analysis of Aging Femur BM: Young (Y), Middle-Aged (M), Old (O), Geriatric (G)

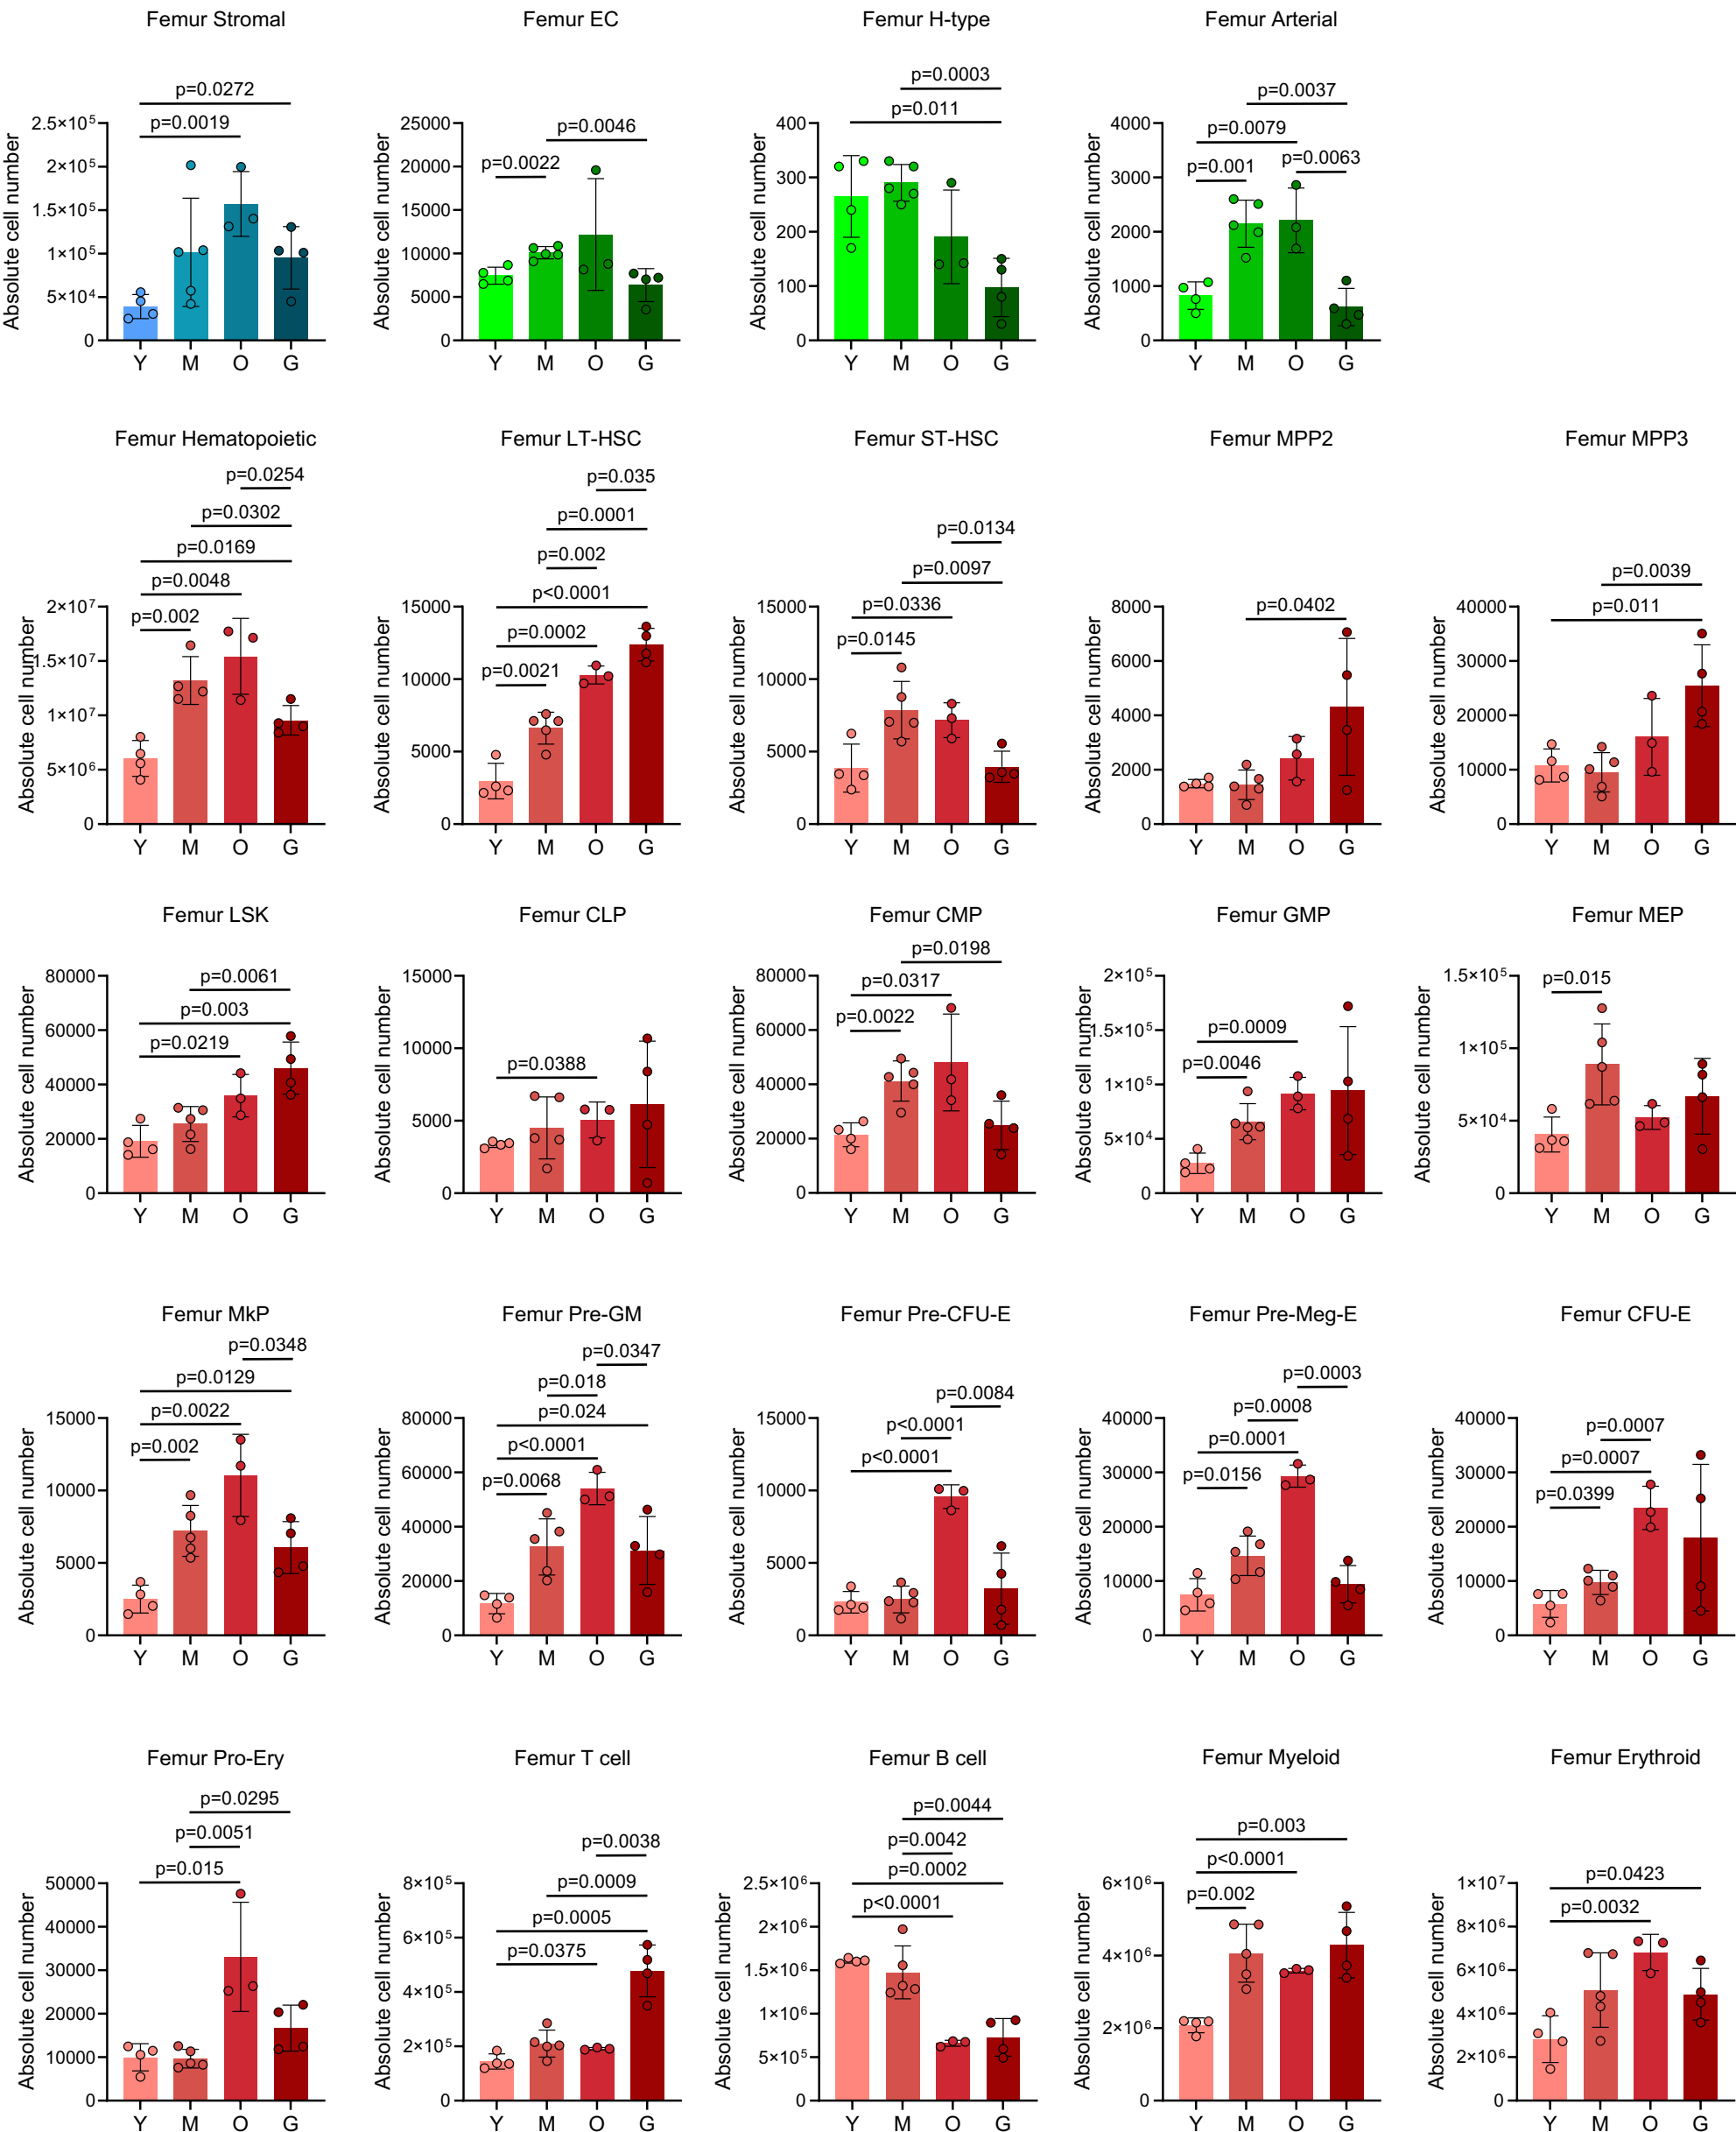

# Flow Cytometric Analysis of Skull BM in Pregnancy (Dpp2: 2 Days post-partum)

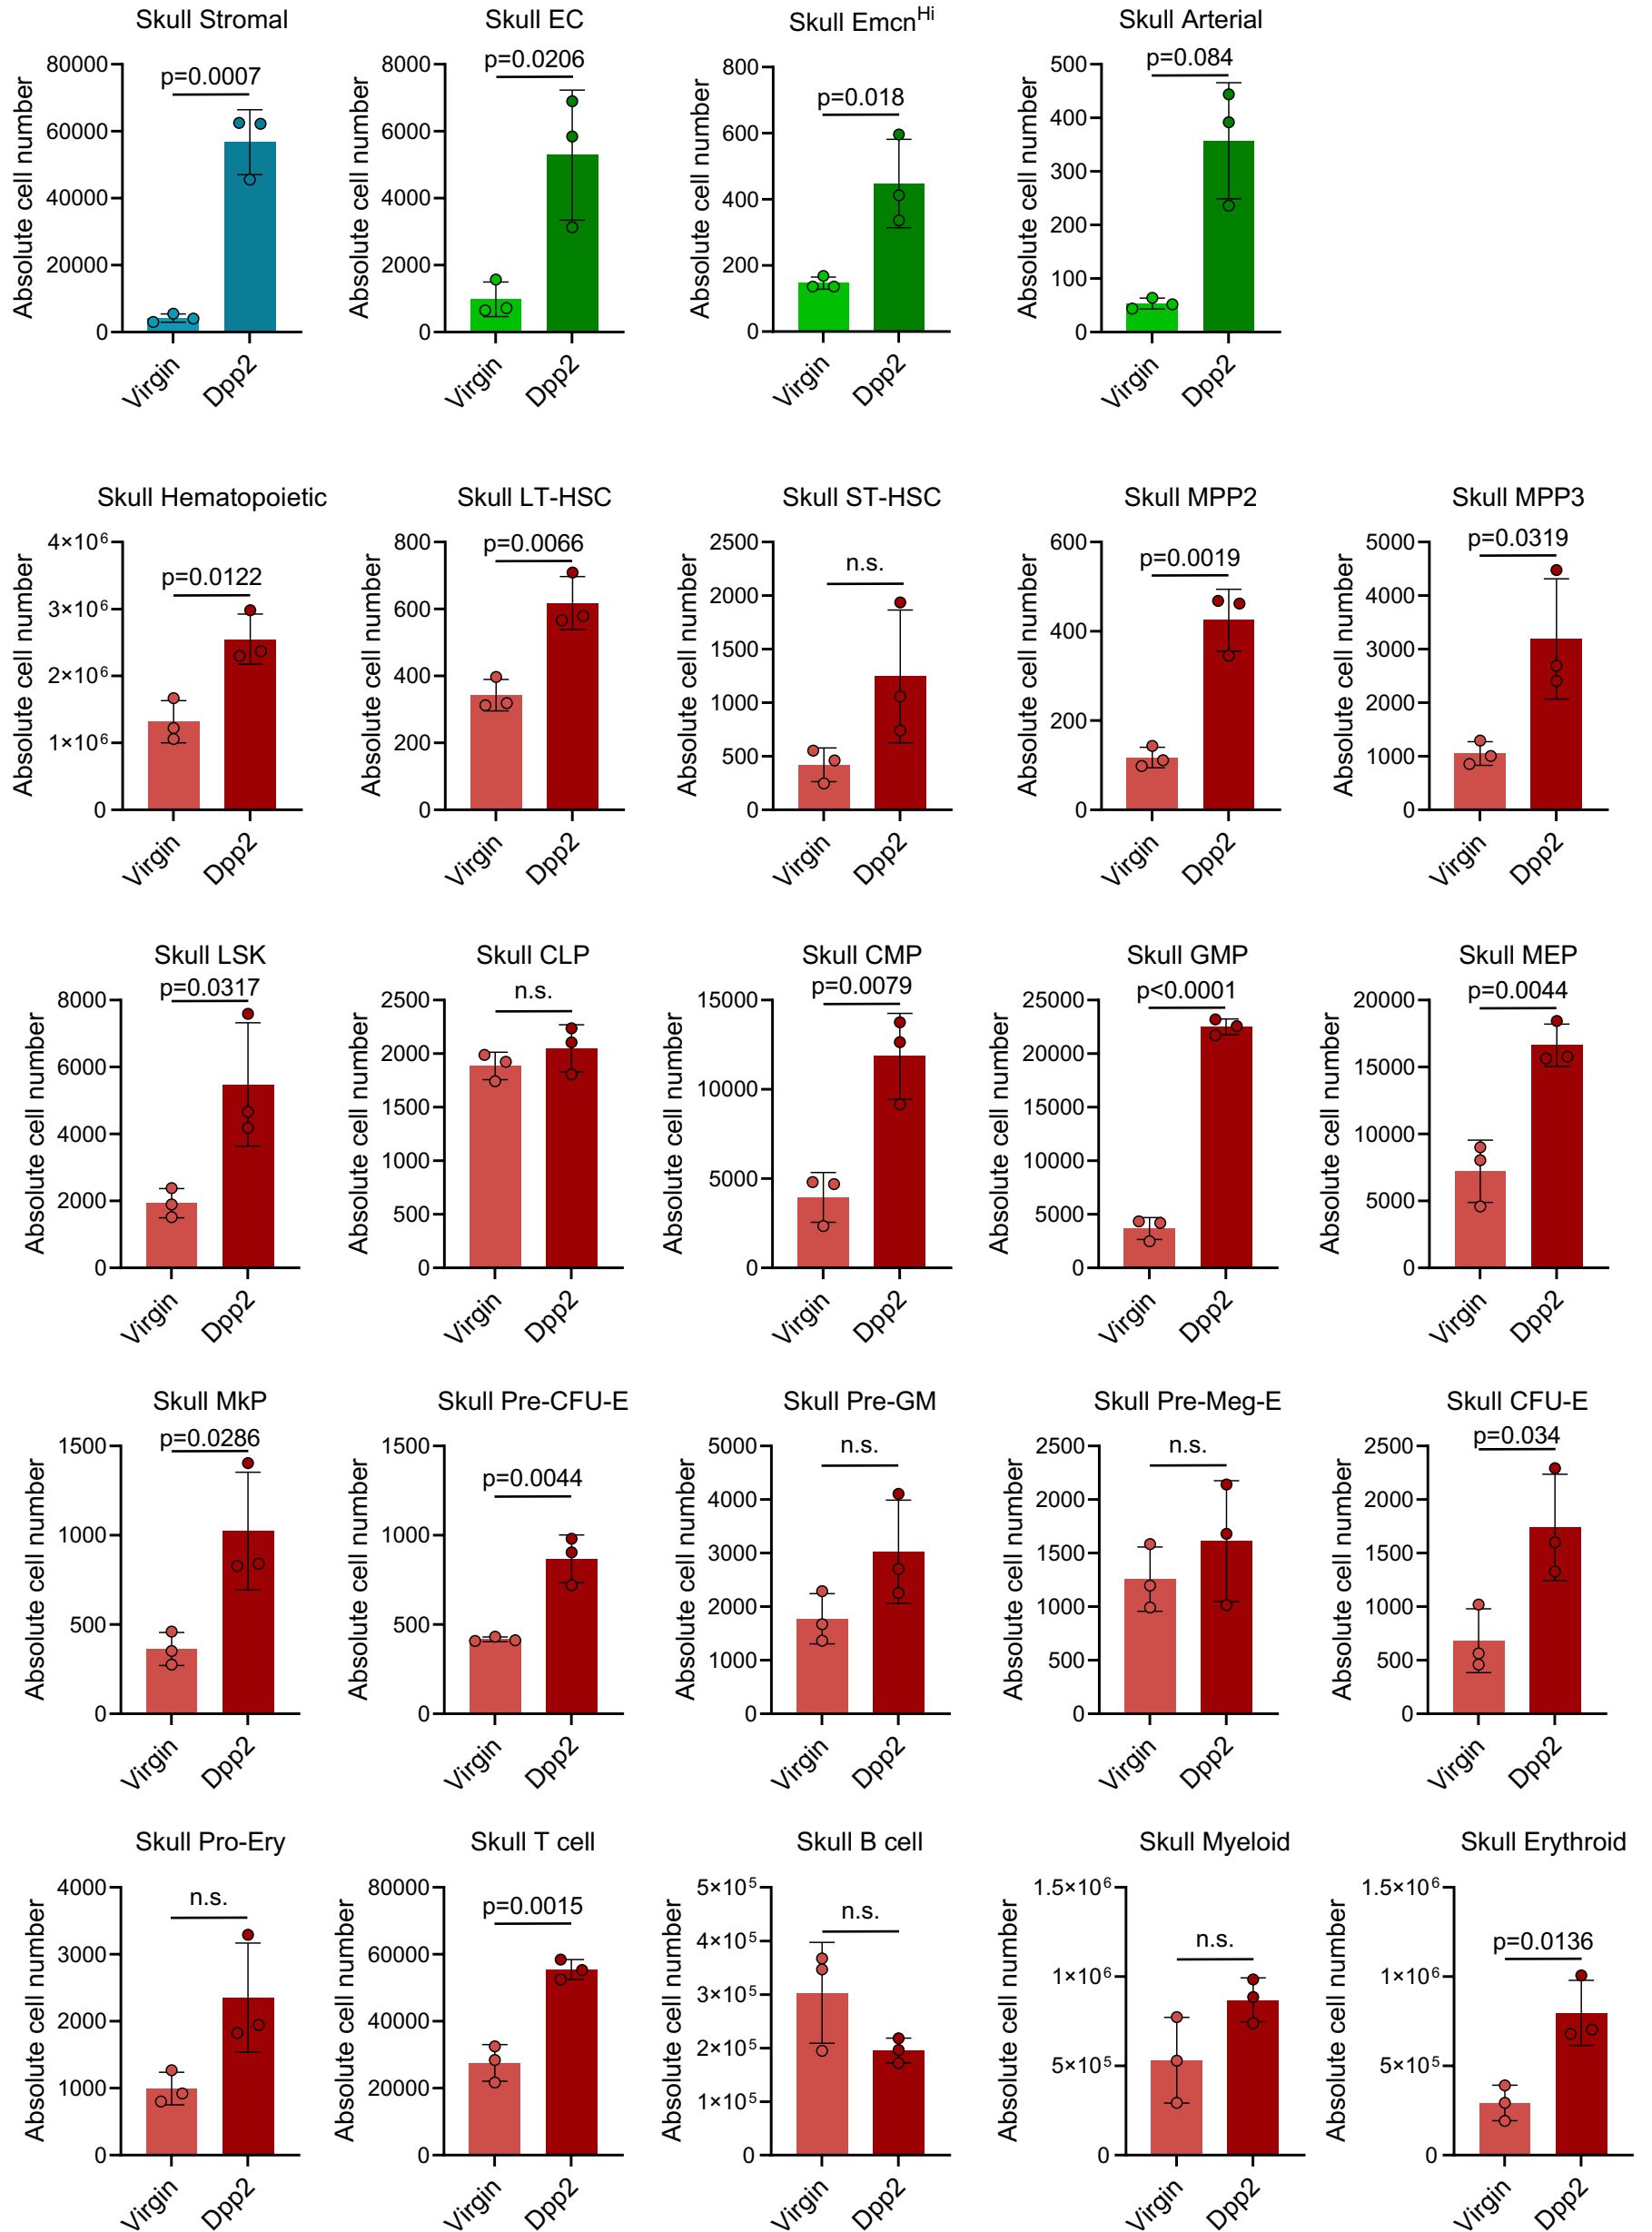

# Flow Cytometric Analysis of Femur BM in Pregnancy (Dpp2: 2 Days post-partum)

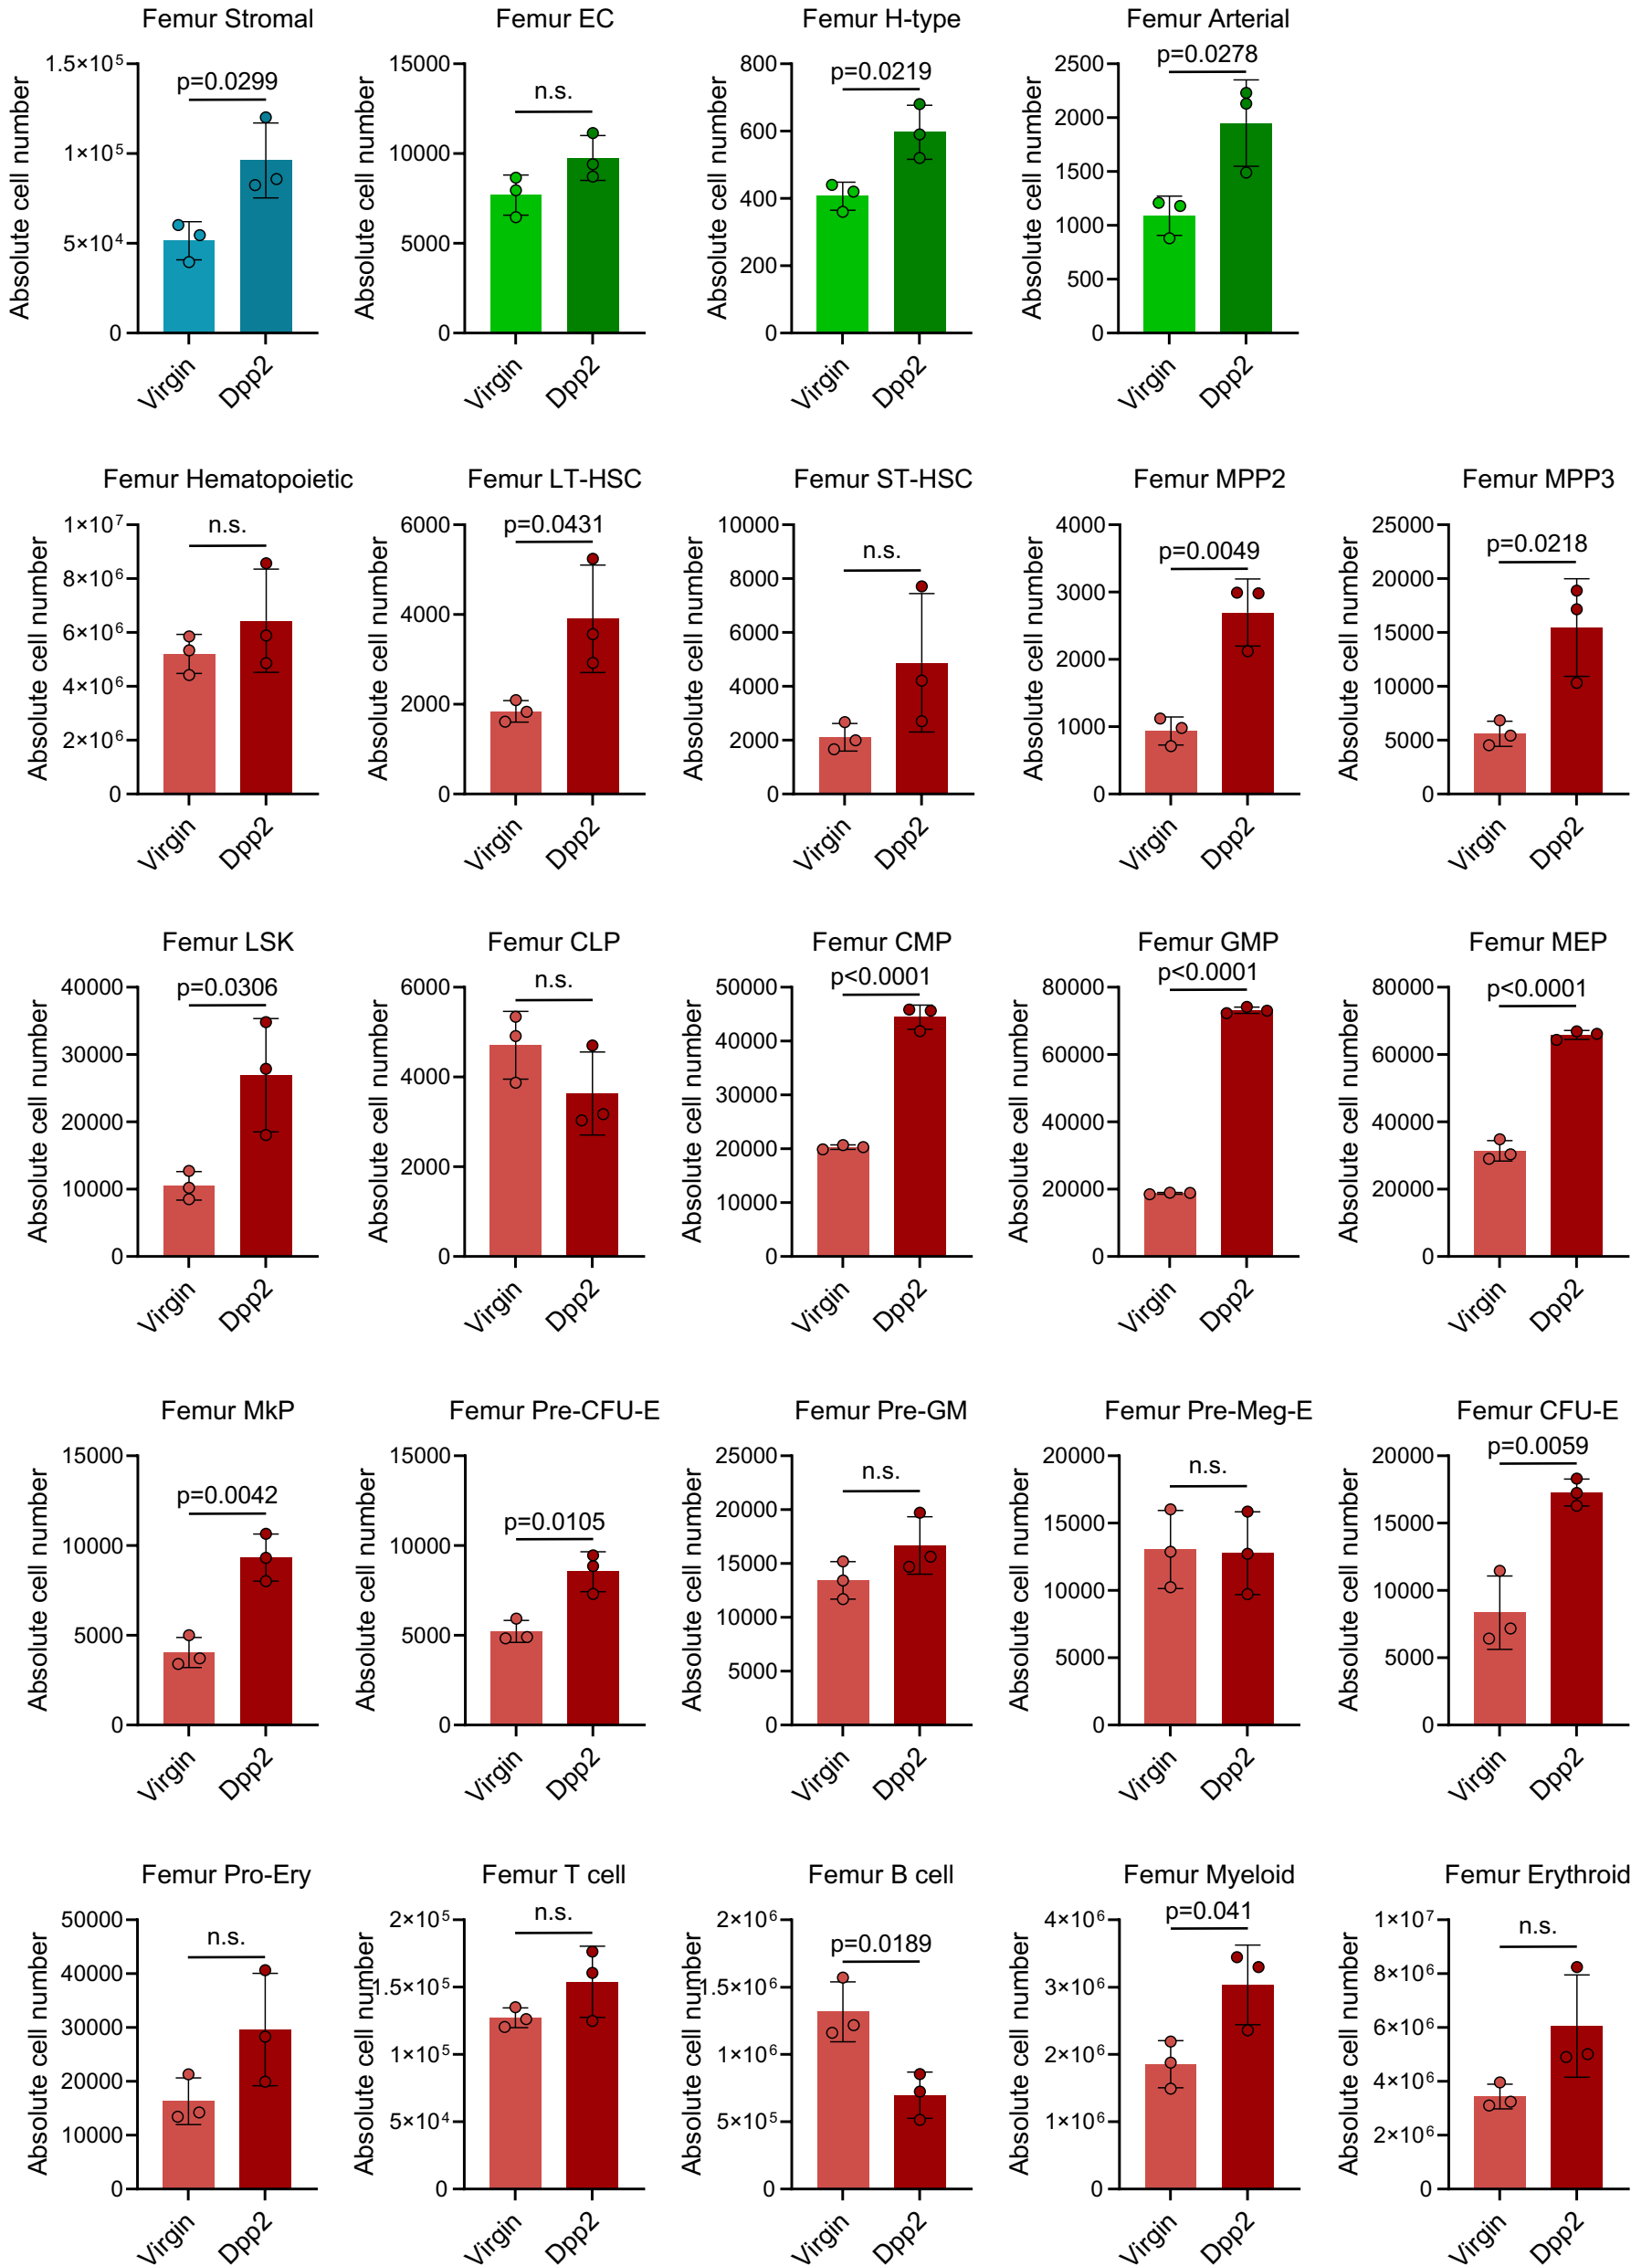

# Flow Cytometric Analysis of Skull BM in Stroke (tMCAO: transient Mid-Cerebral Artery Occlusion)

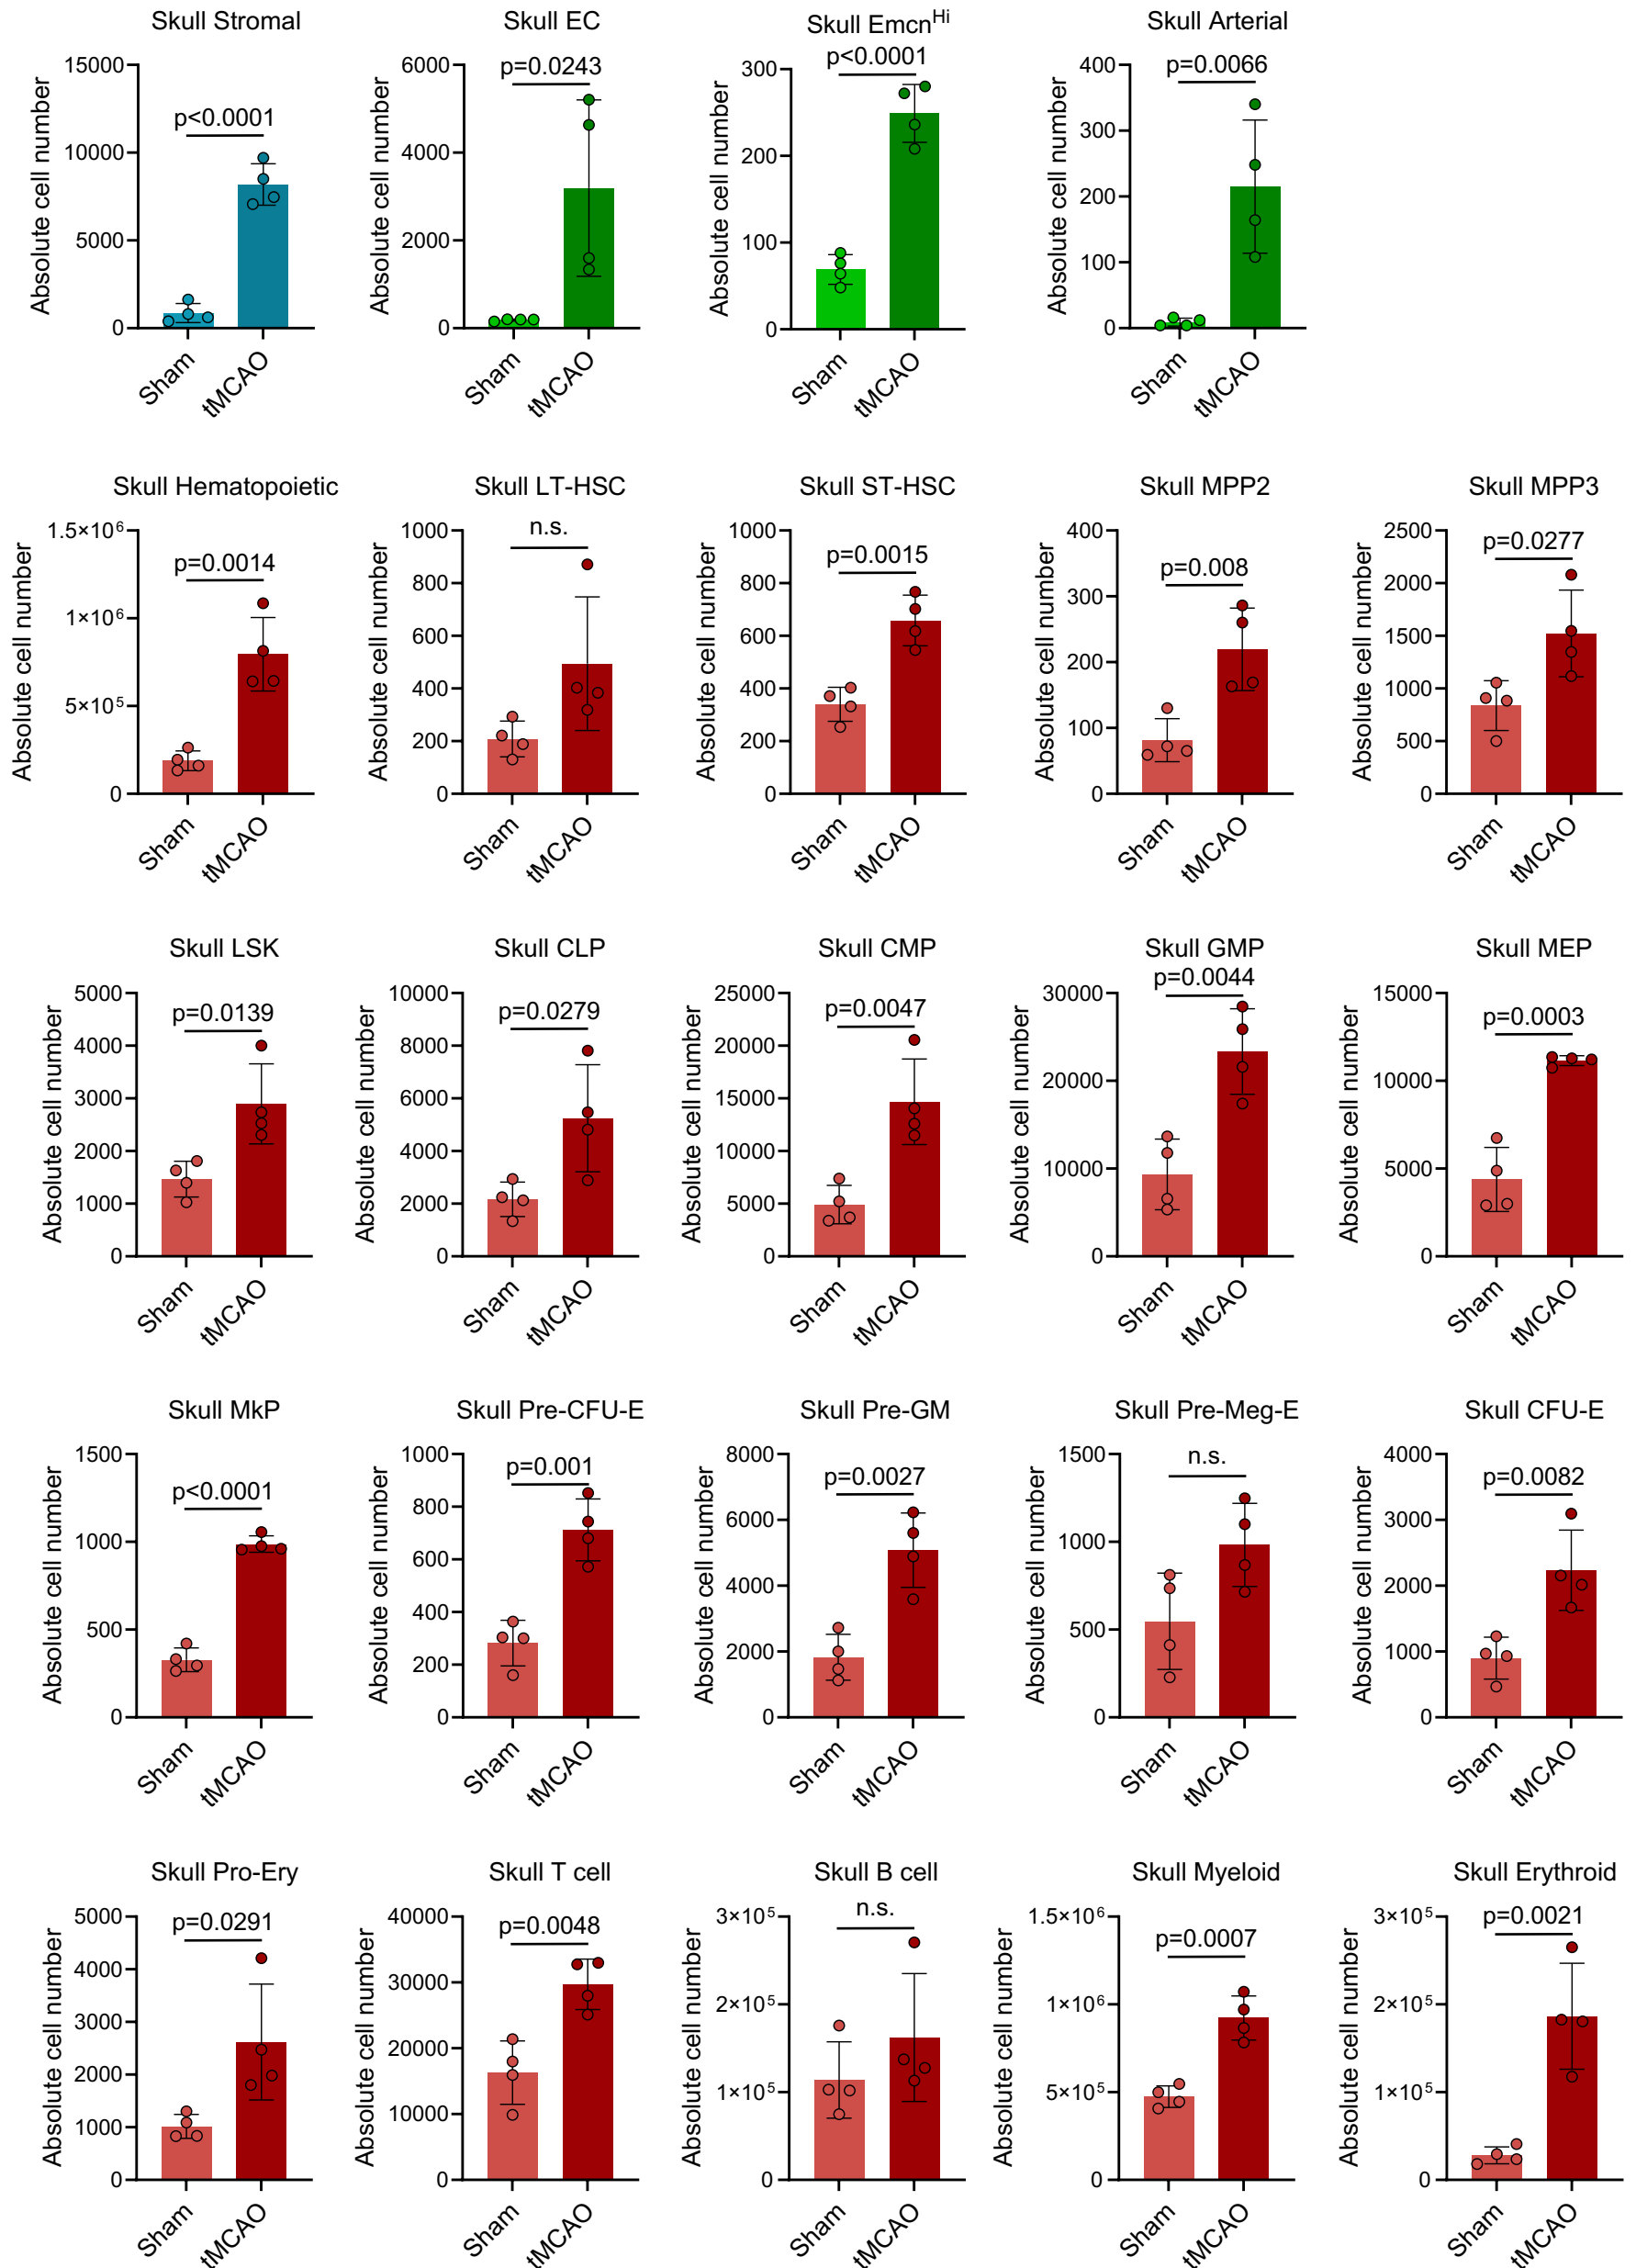

# Flow Cytometric Analysis of Femur BM in Stroke (tMCAO: transient Mid-Cerebral Artery Occlusion)

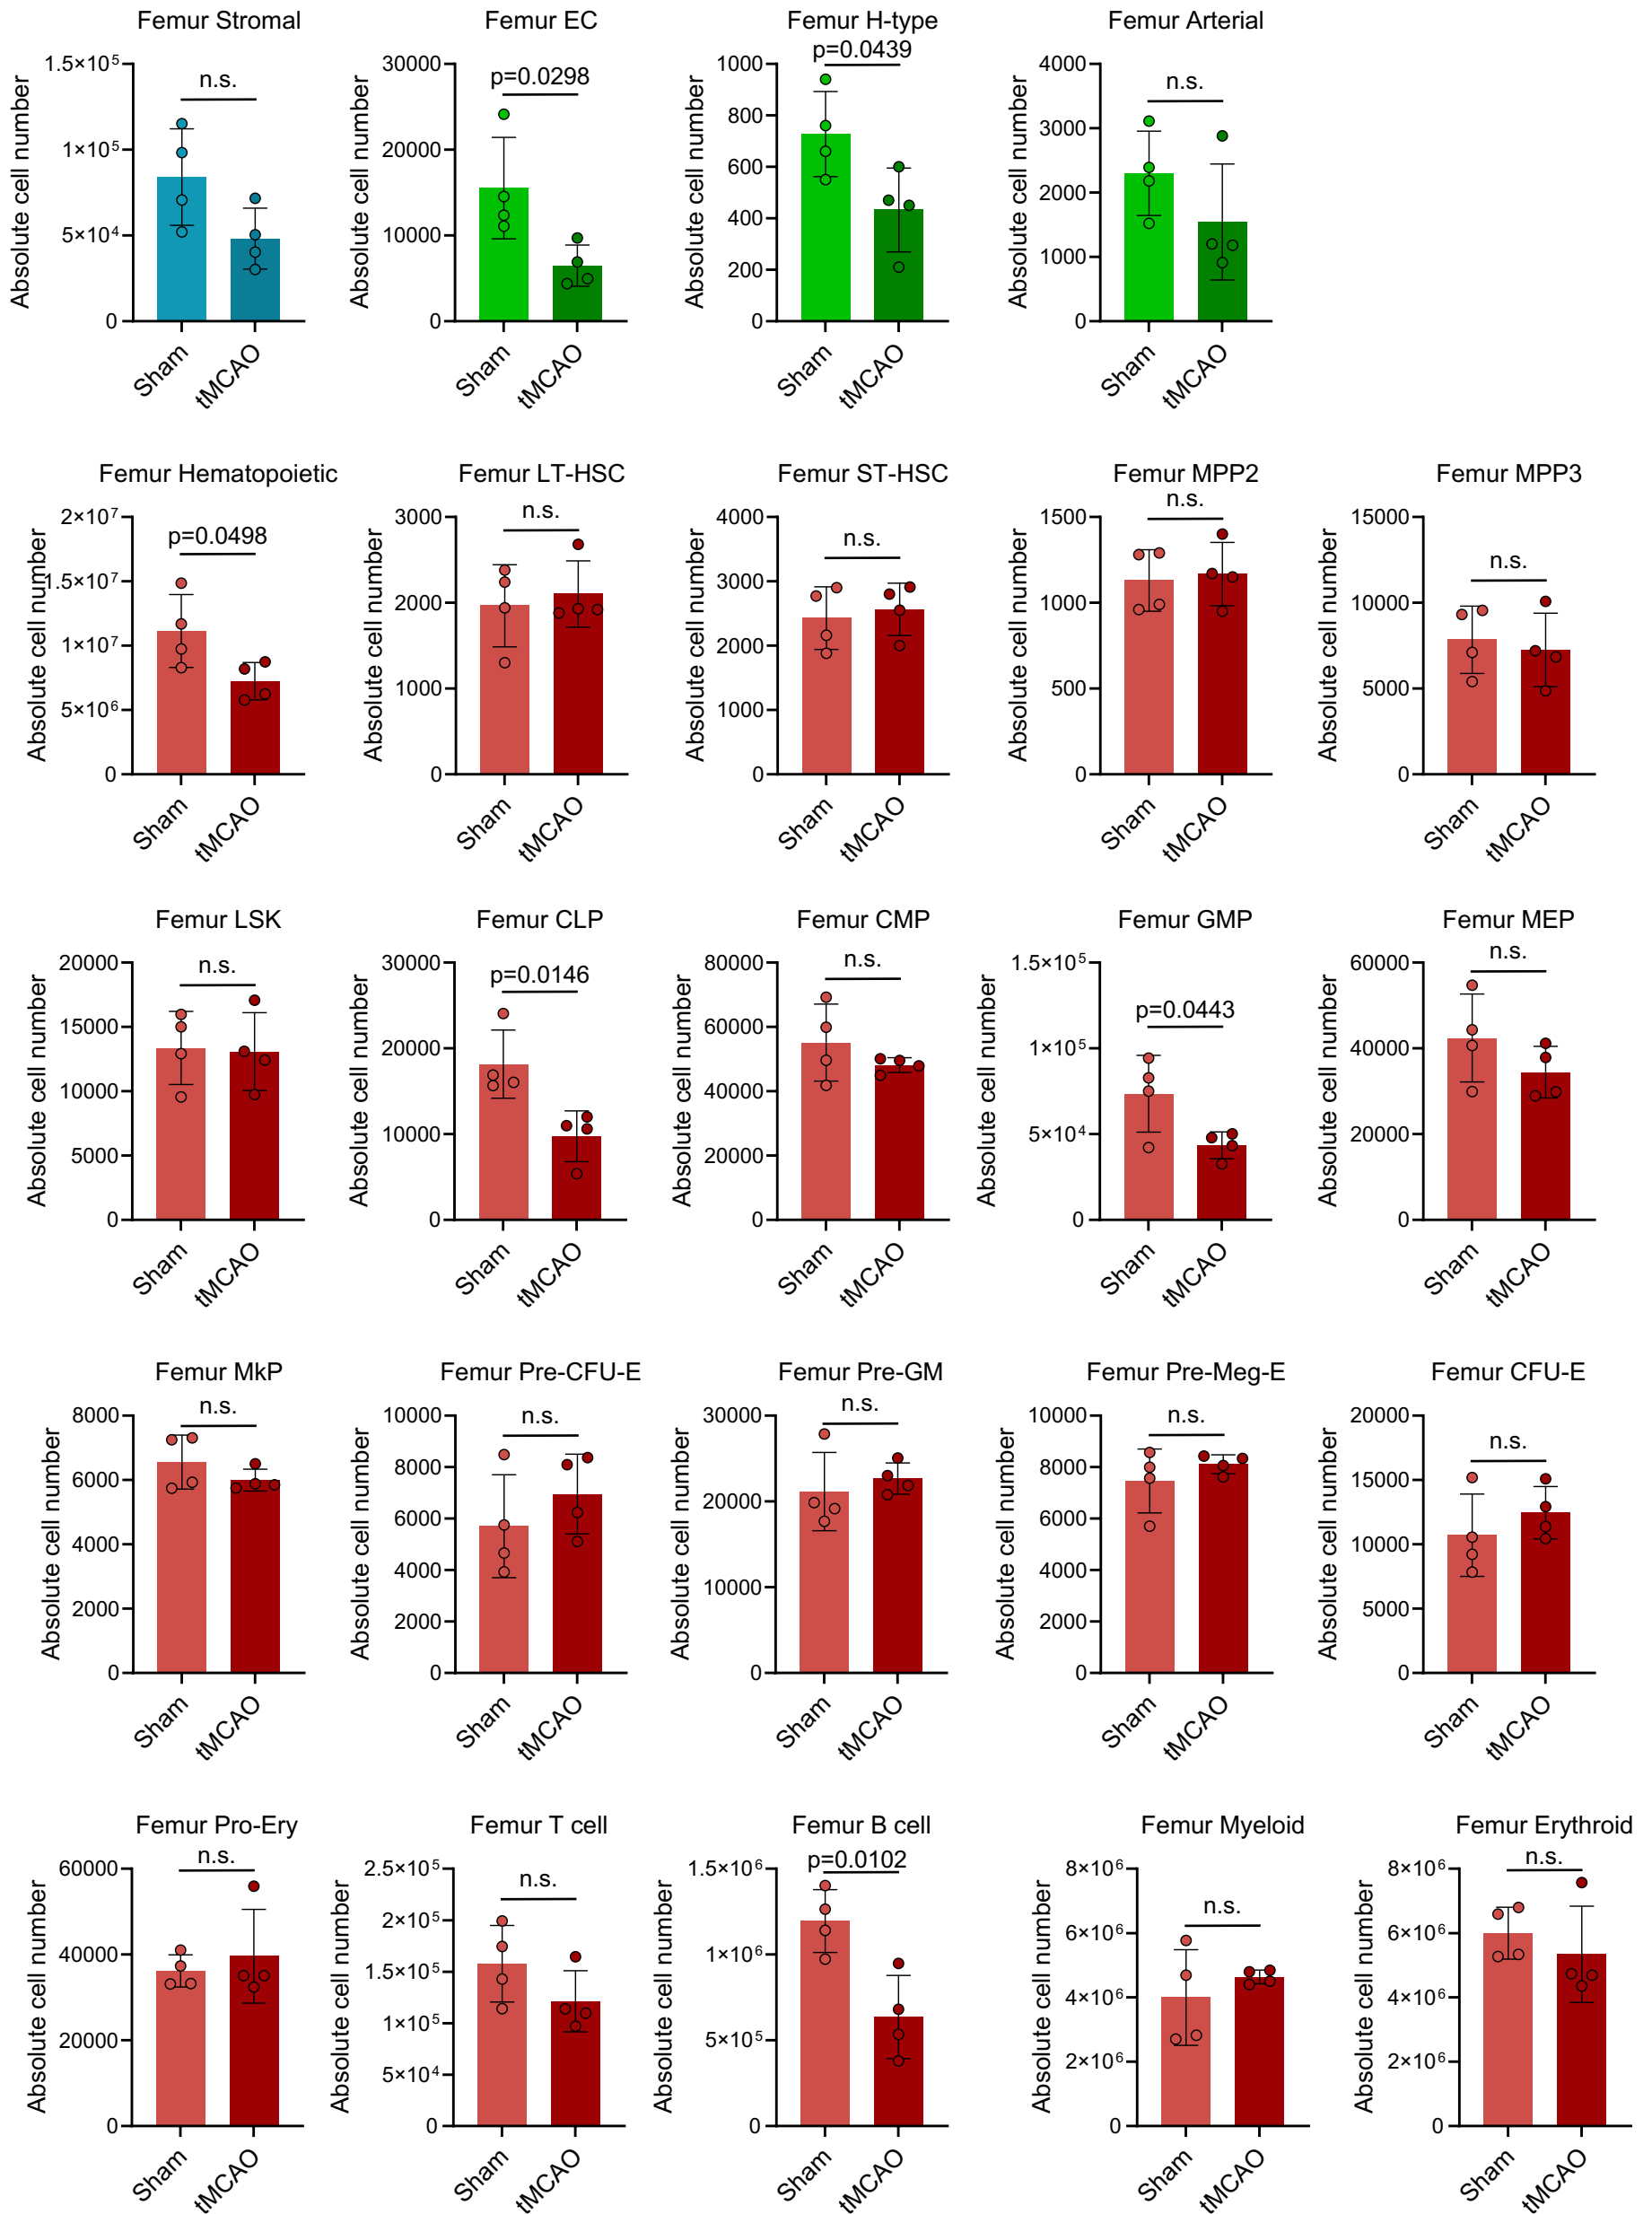



# Flow Cytometric Analysis of Skull BM in Chronic Myeloid Leukemia (CML)

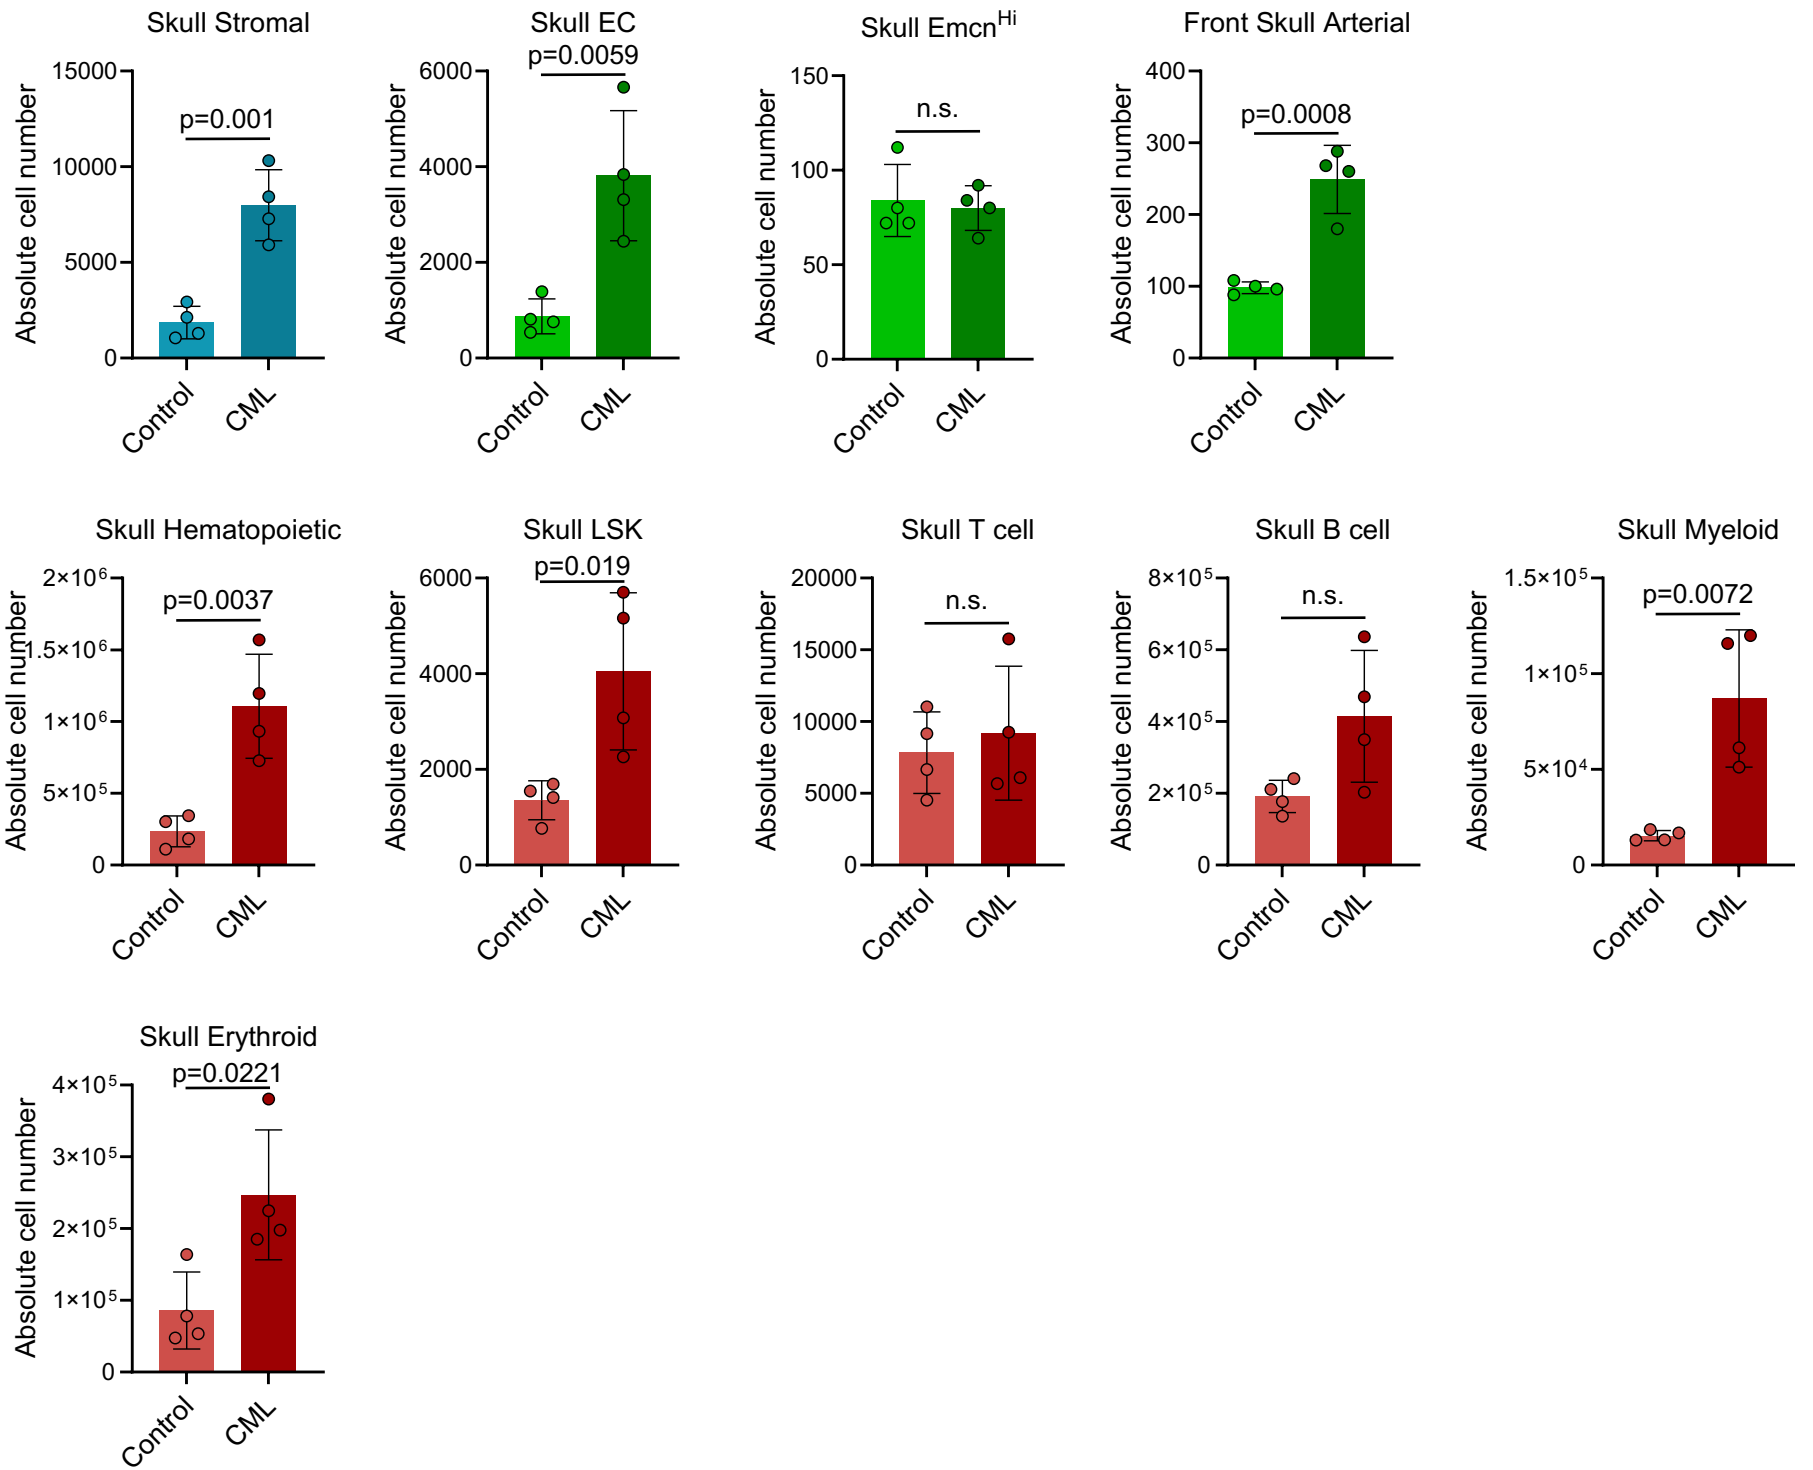

# Flow Cytometric Analysis of Femur BM in Chronic Myeloid Leukemia (CML)

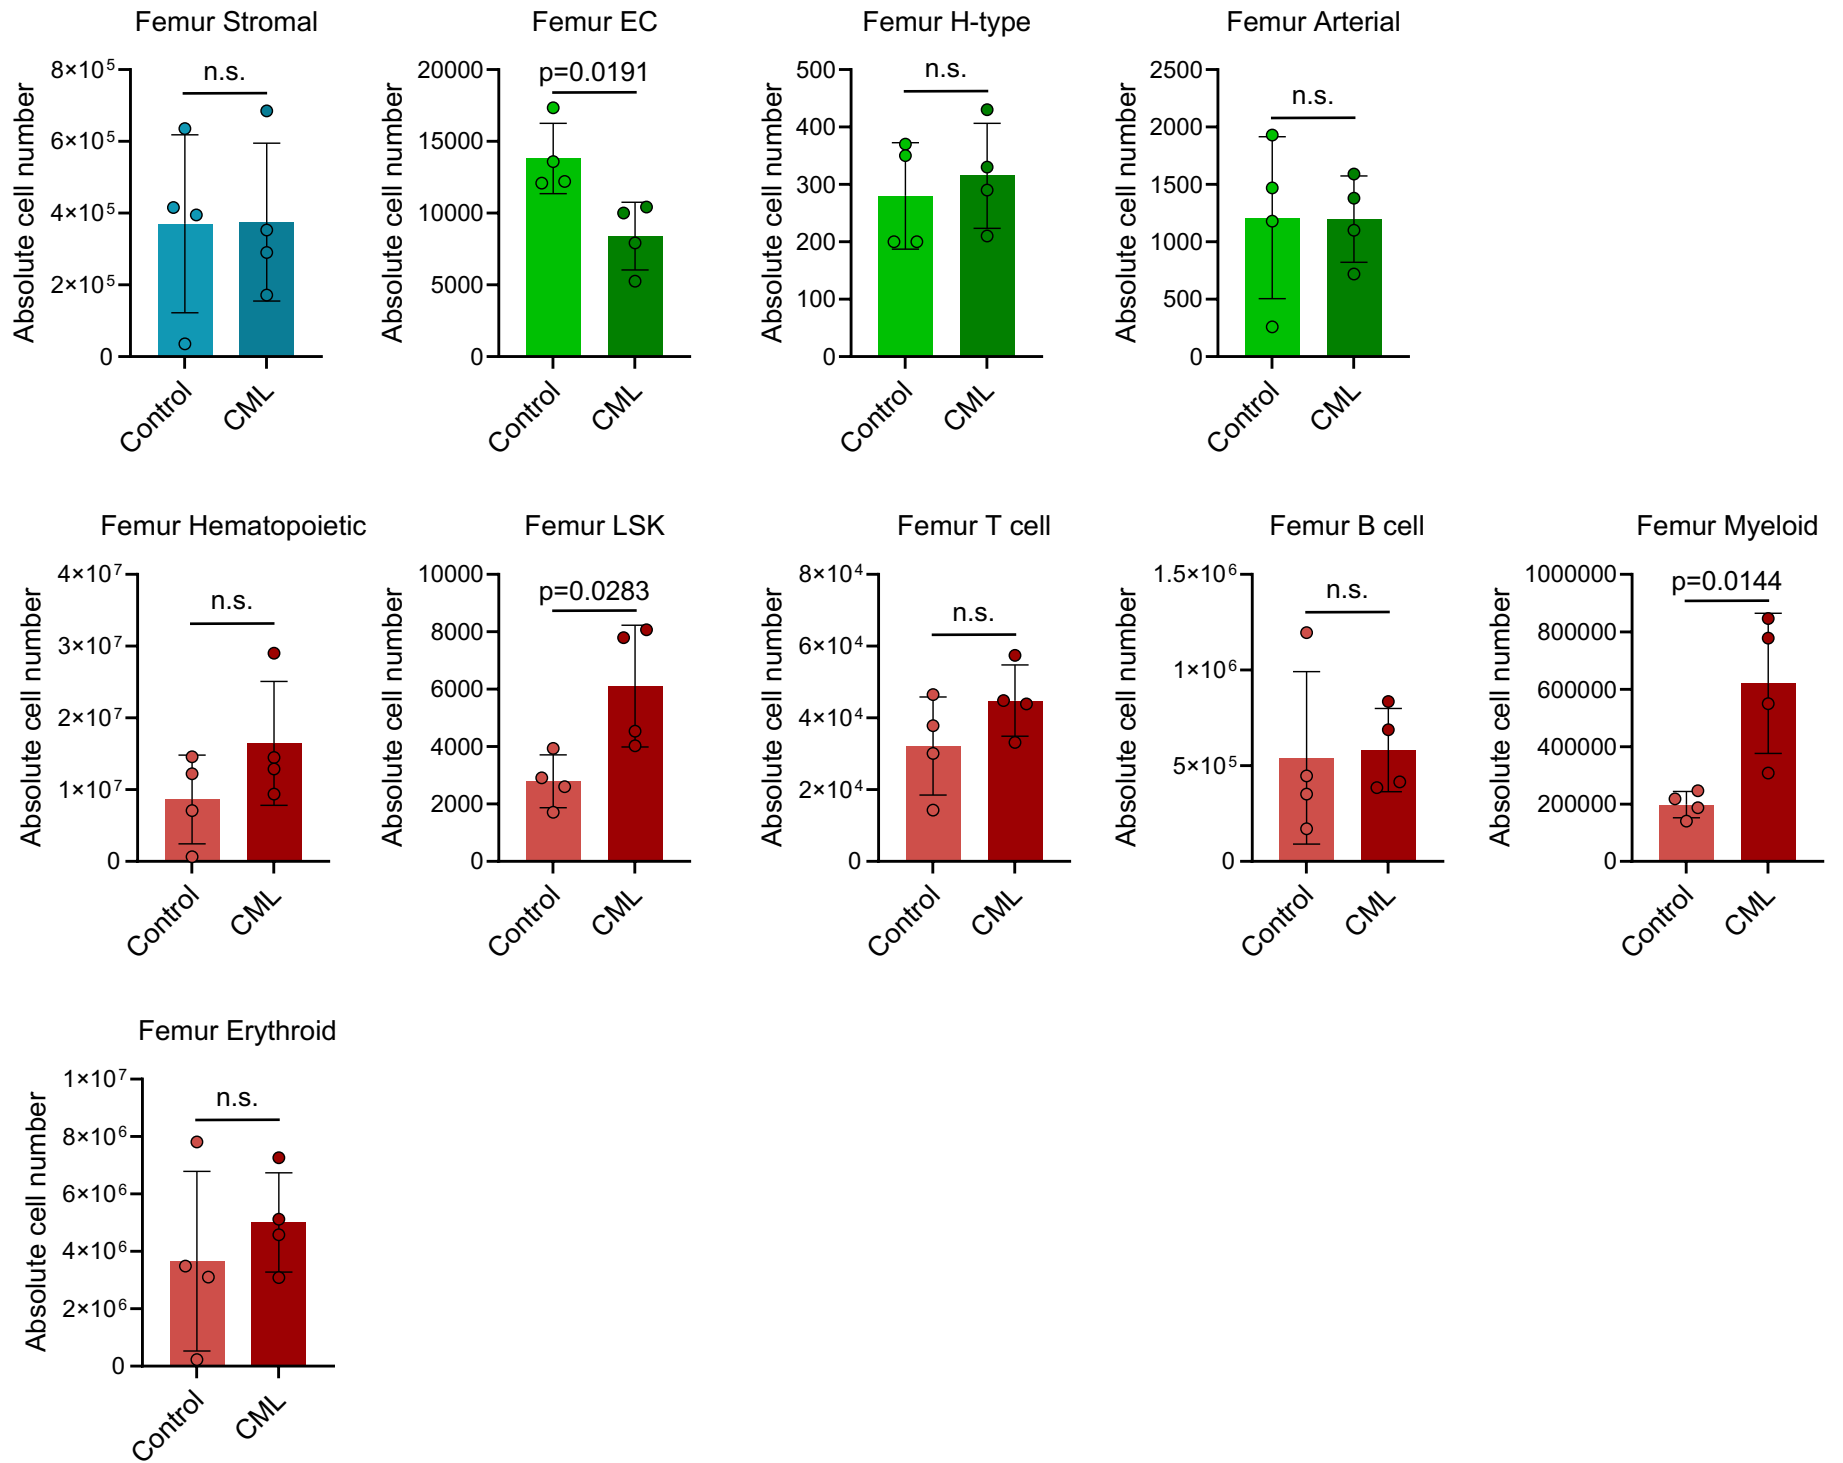

# Flow Cytometric Analysis of Skull BM after Parathyroid Hormone (PTH) Treatment

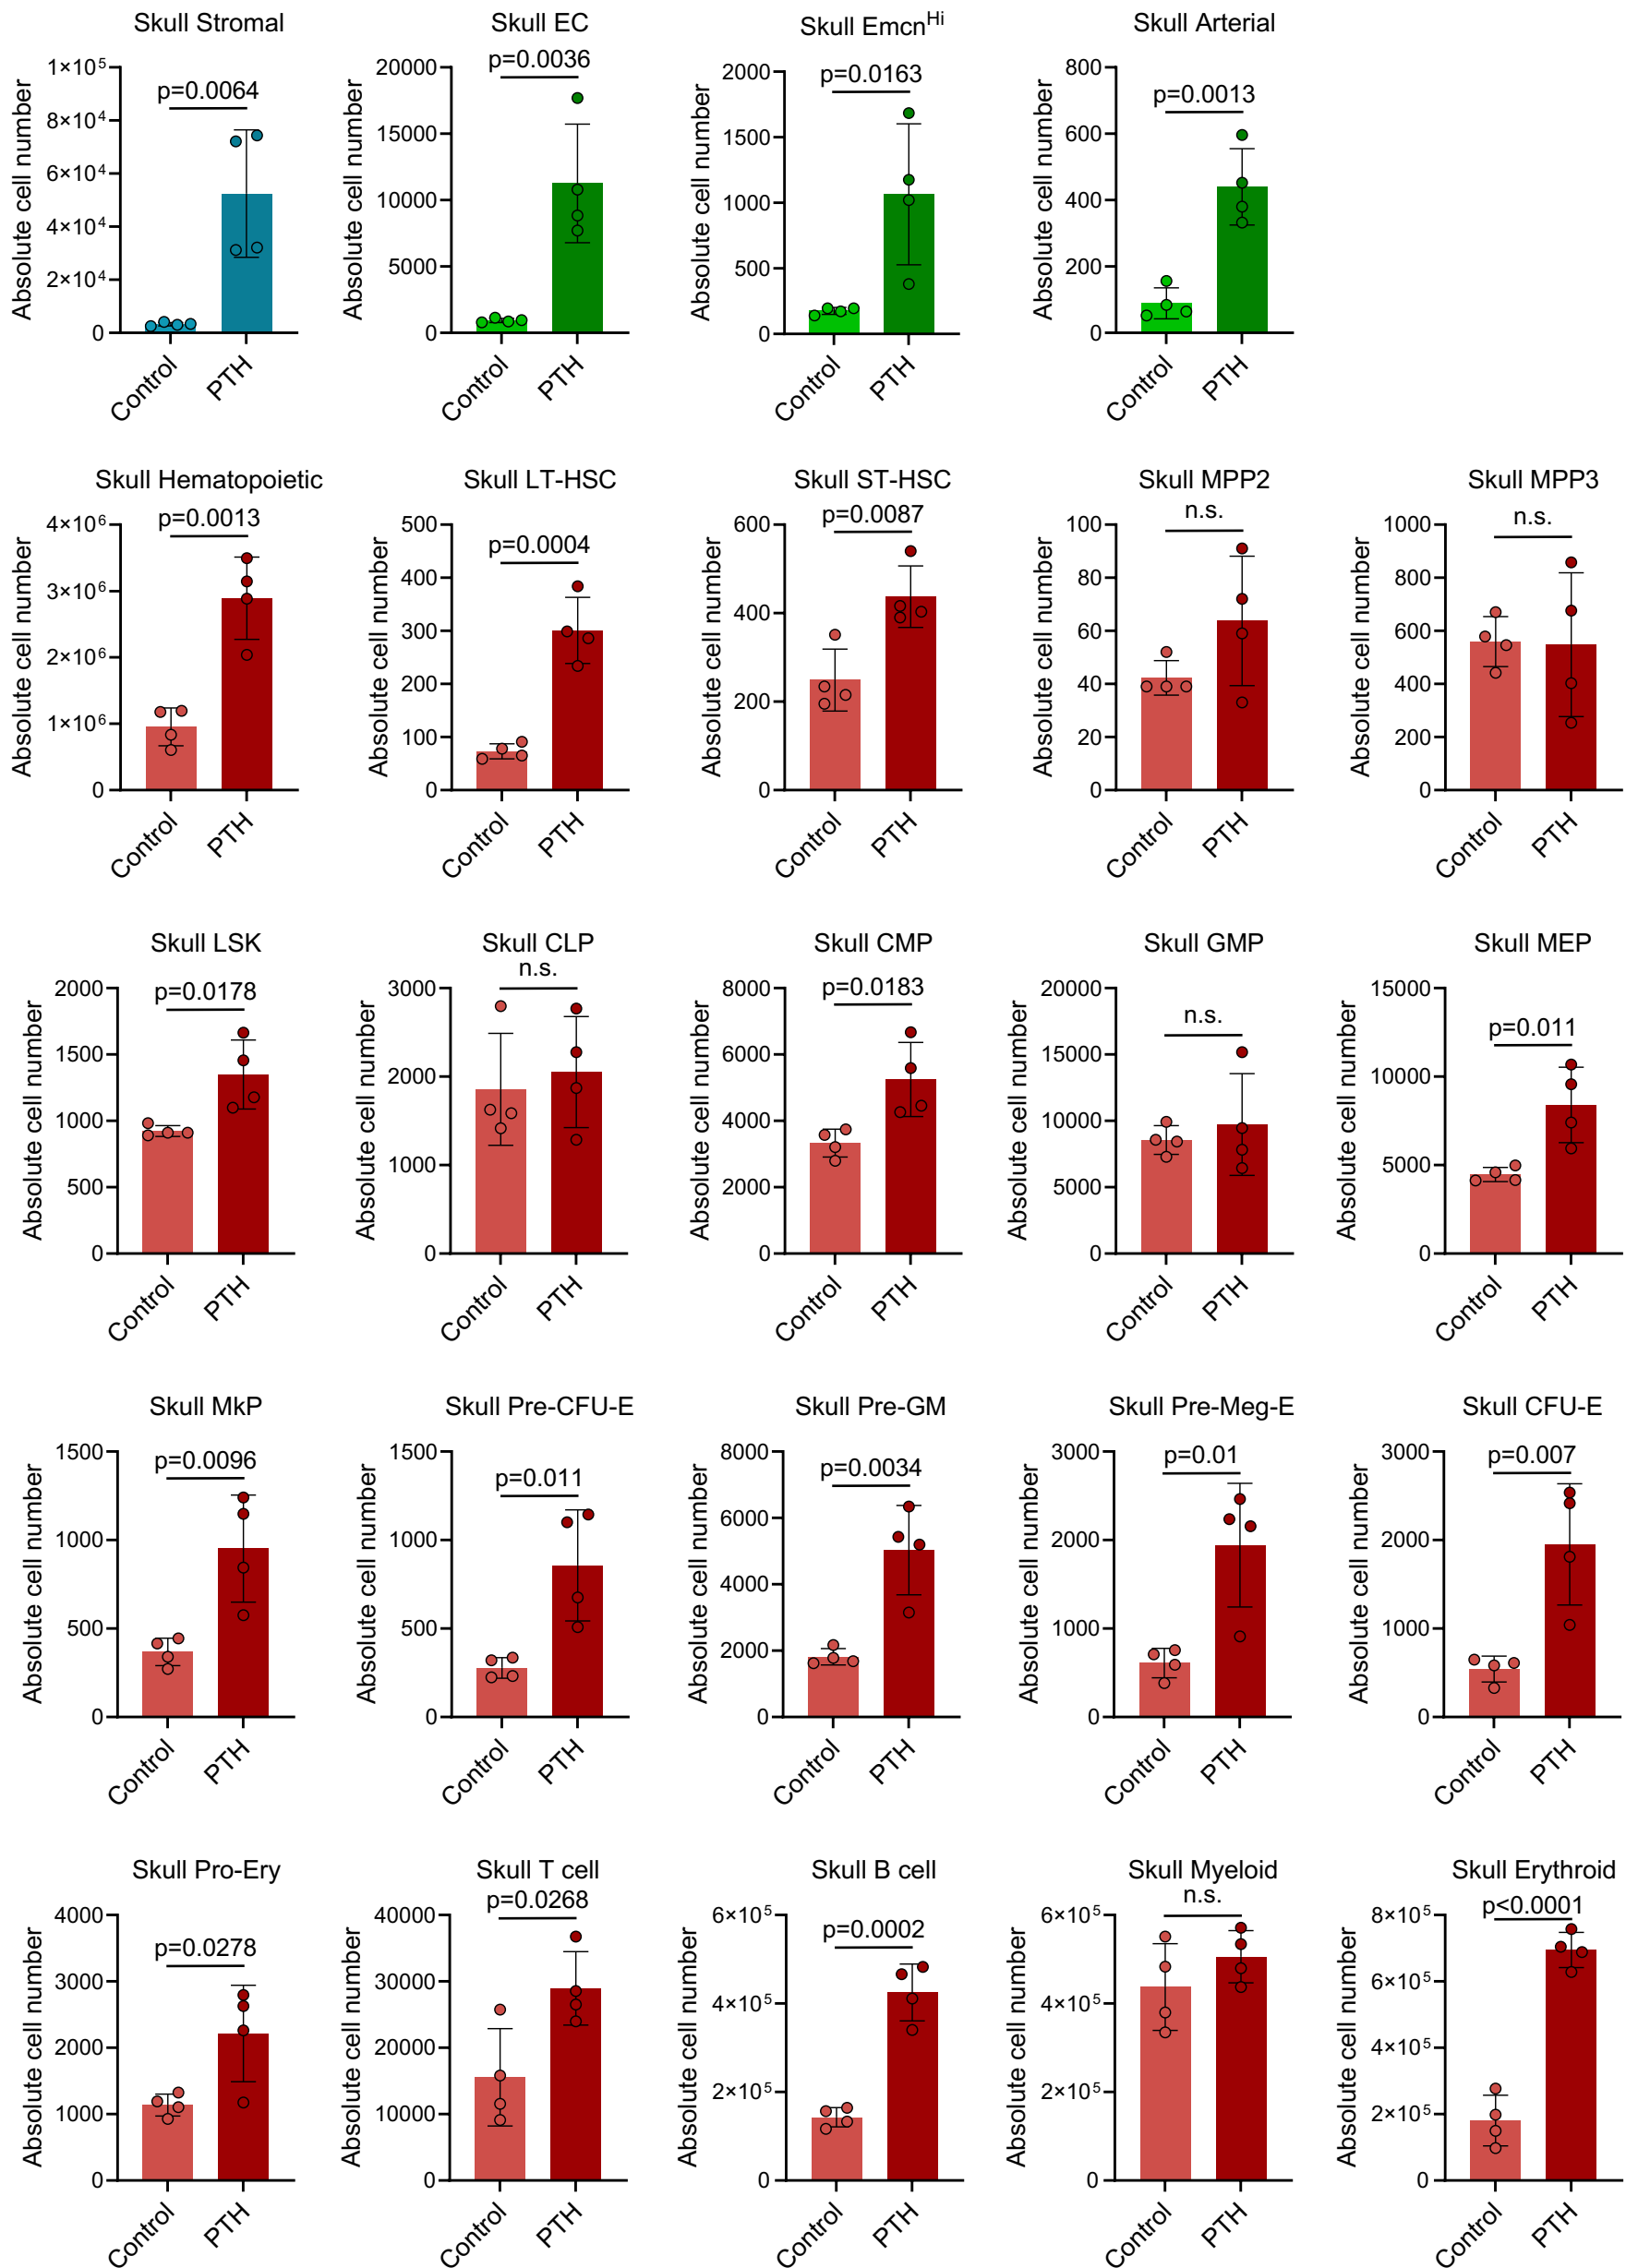

# Flow Cytometric Analysis of Femur BM after Parathyroid Hormone (PTH) Treatment

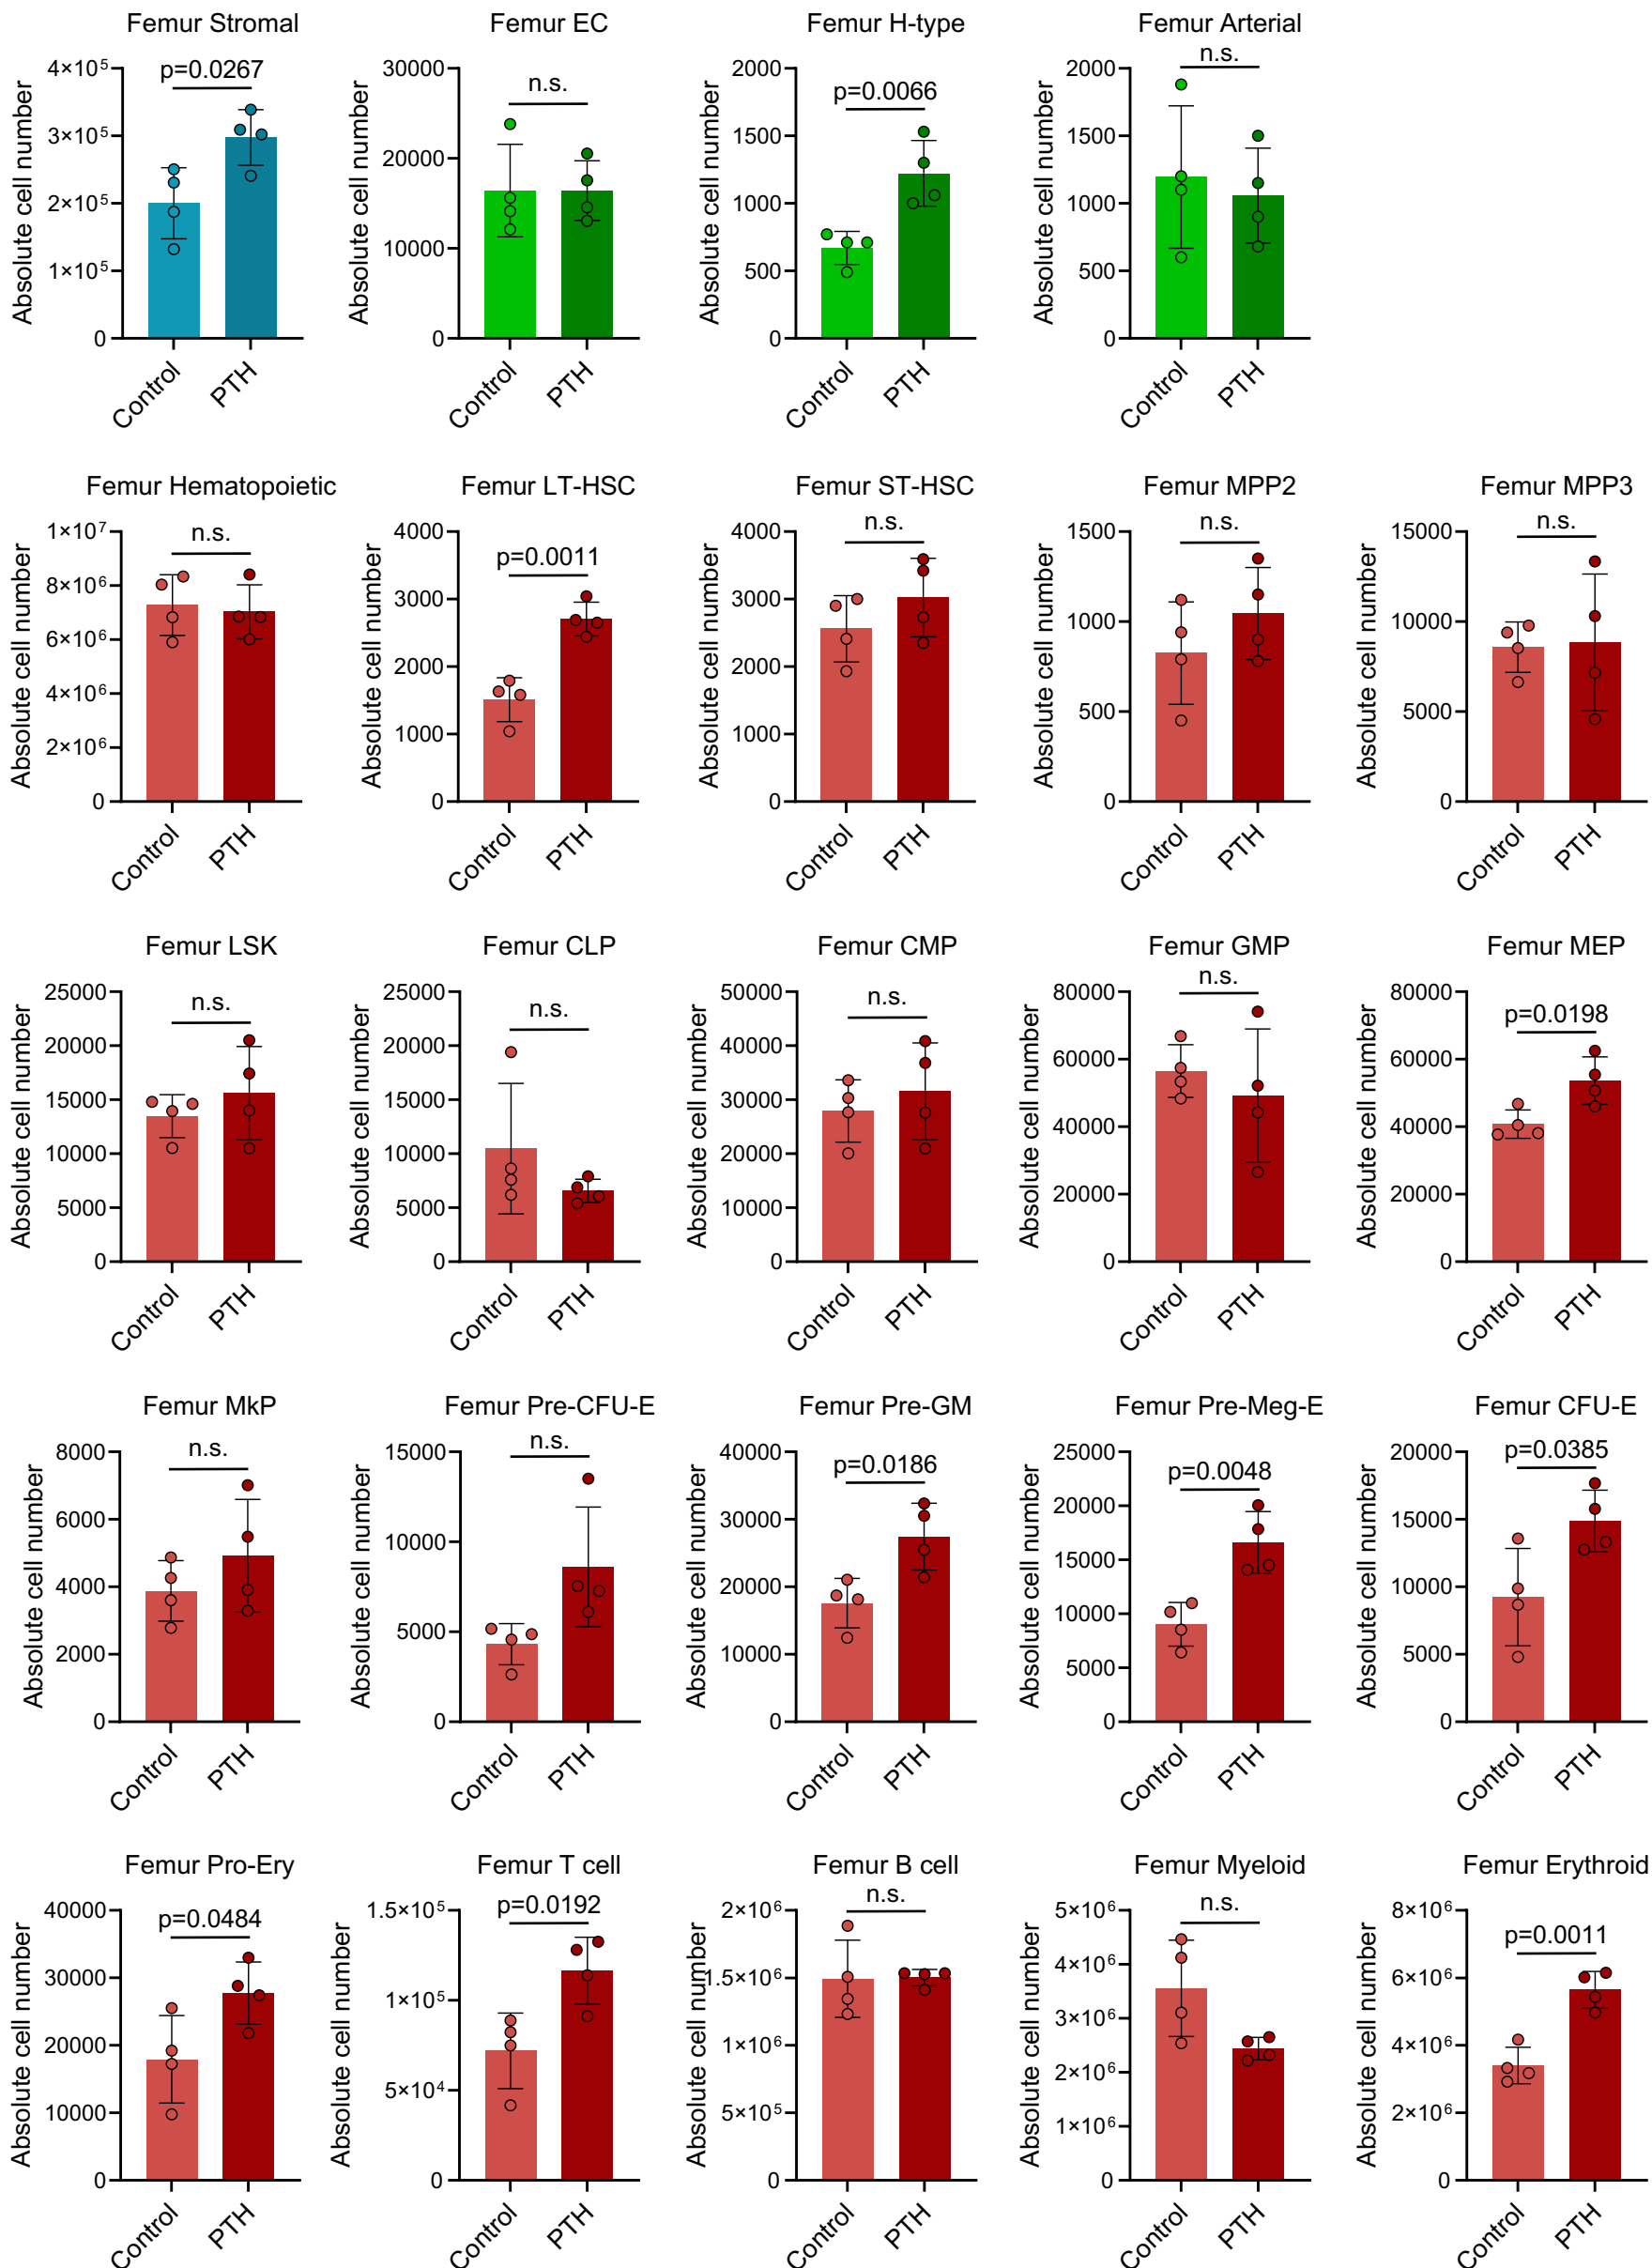

# Flow Cytometric Analysis of Skull BM after Young *versus* Old Donor Transplantation

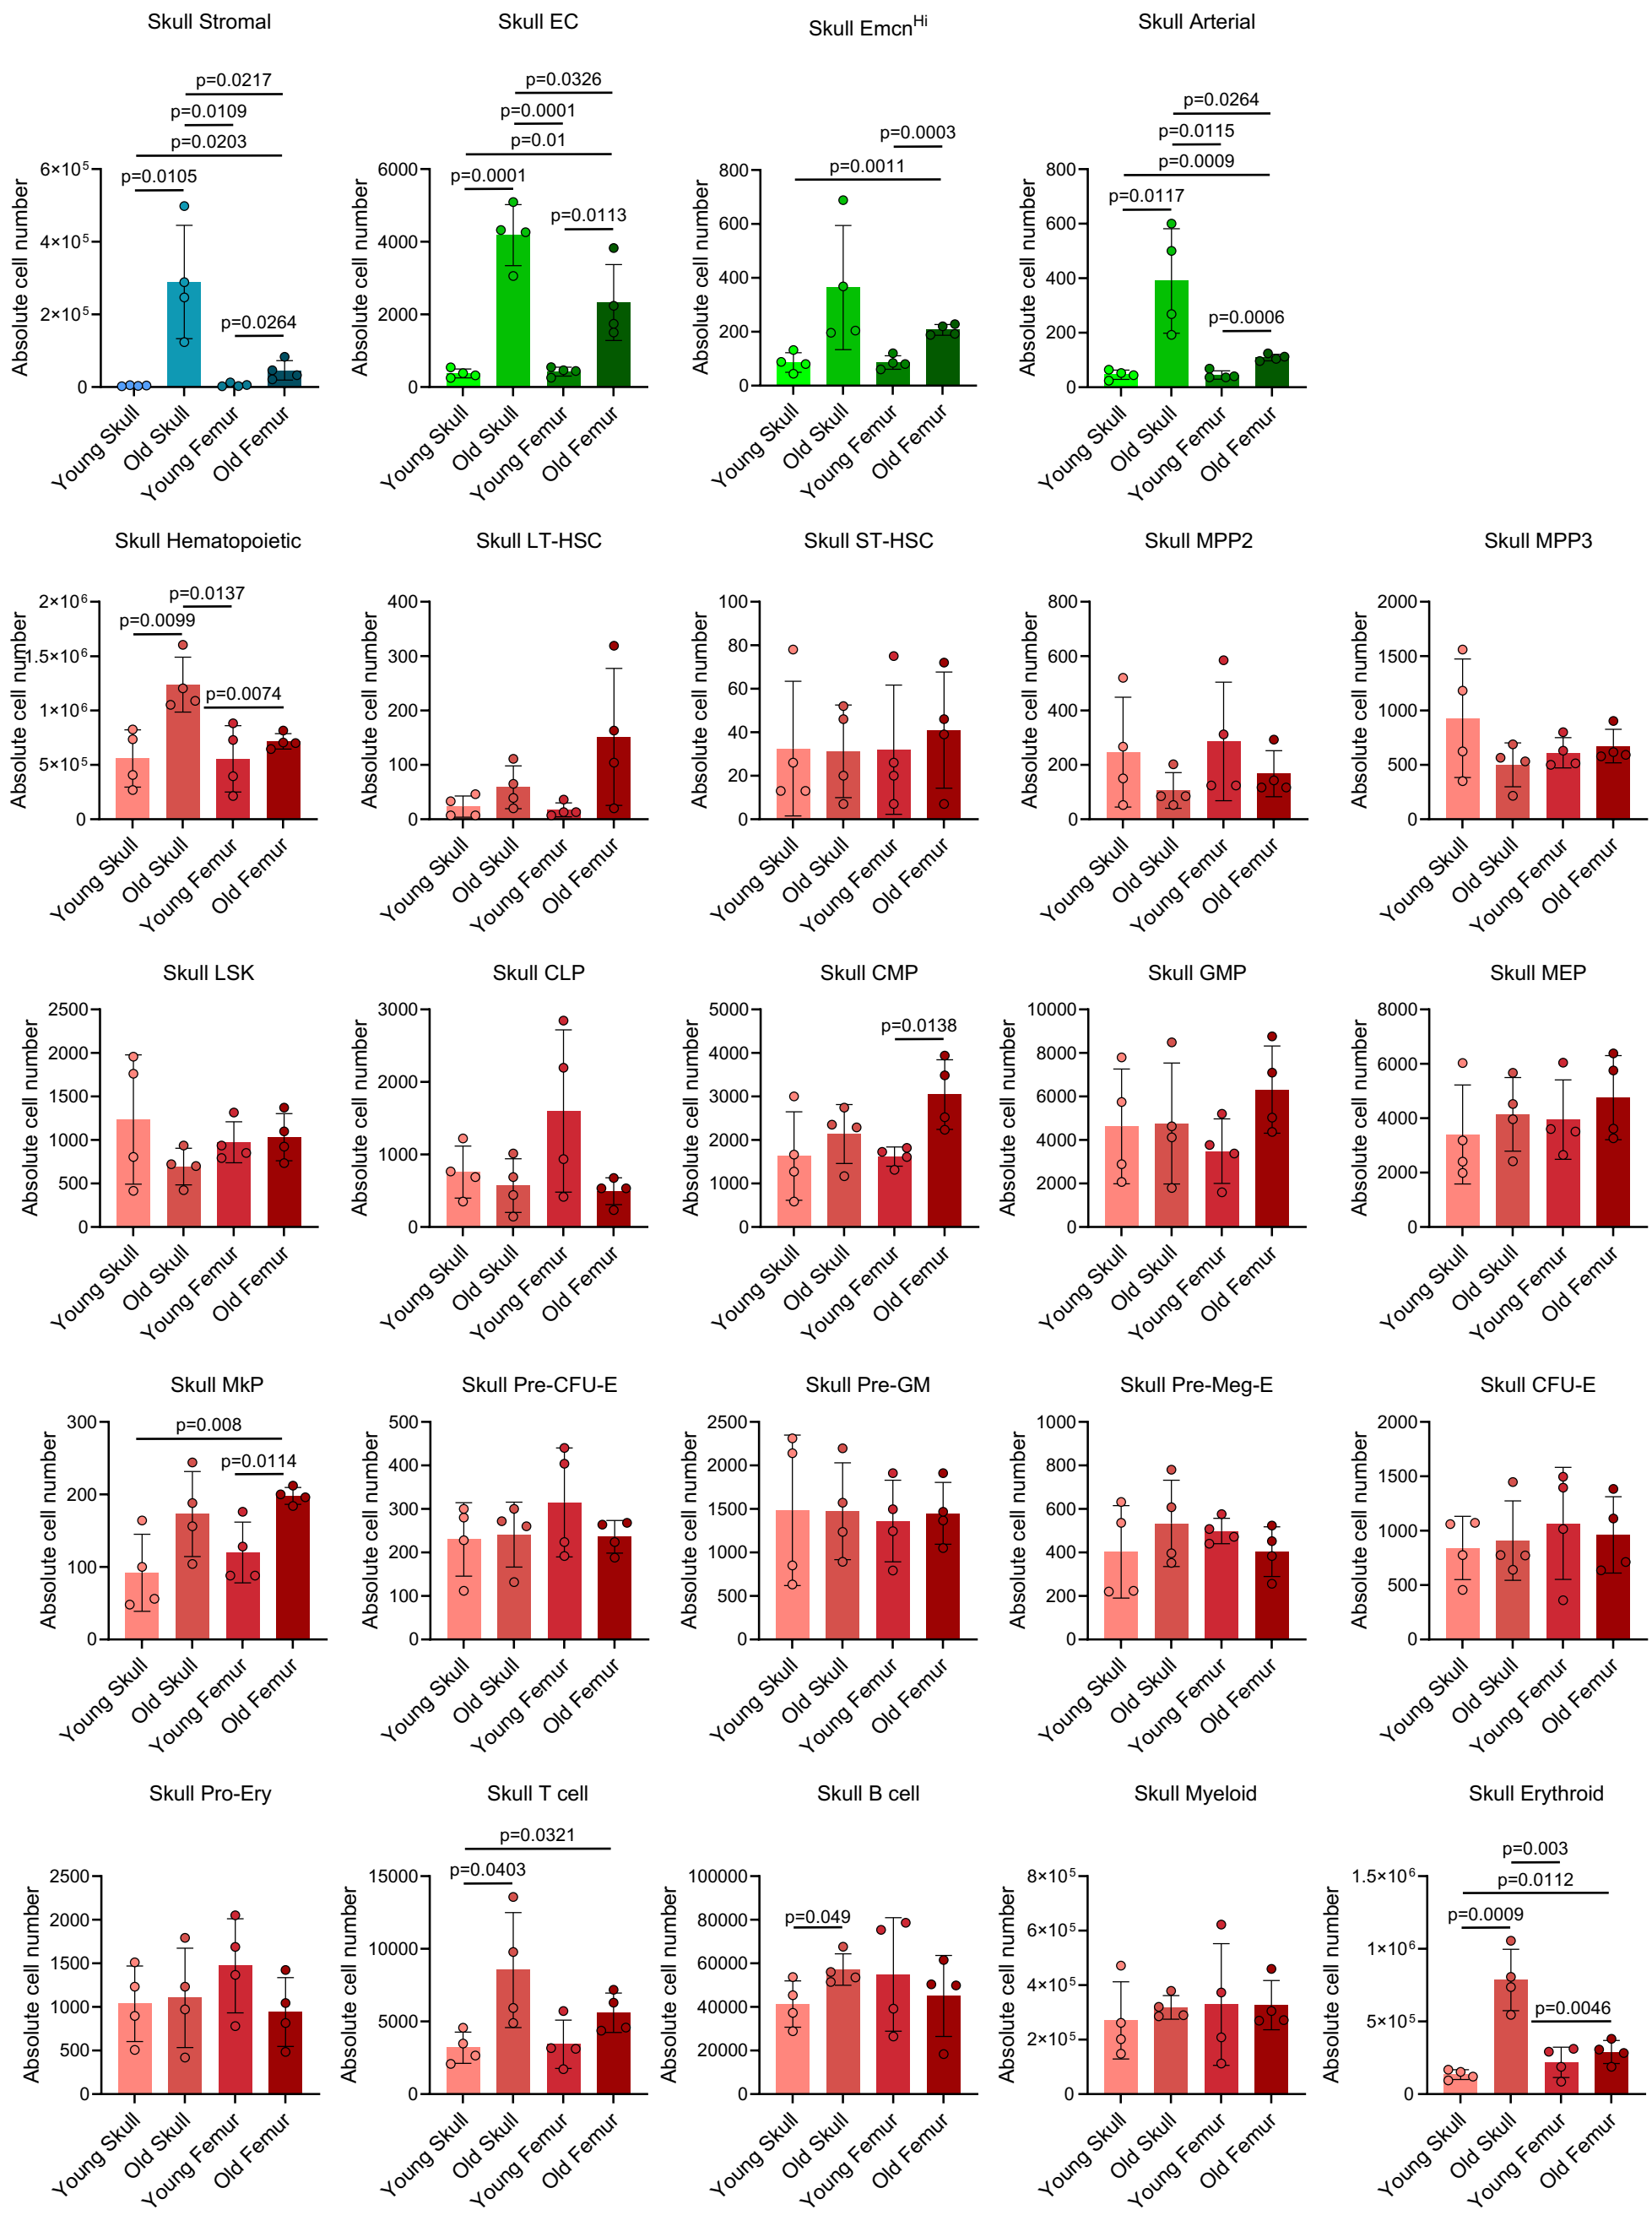

# Flow Cytometric Analysis of Femur BM after Young *versus* Old Donor Transplantation

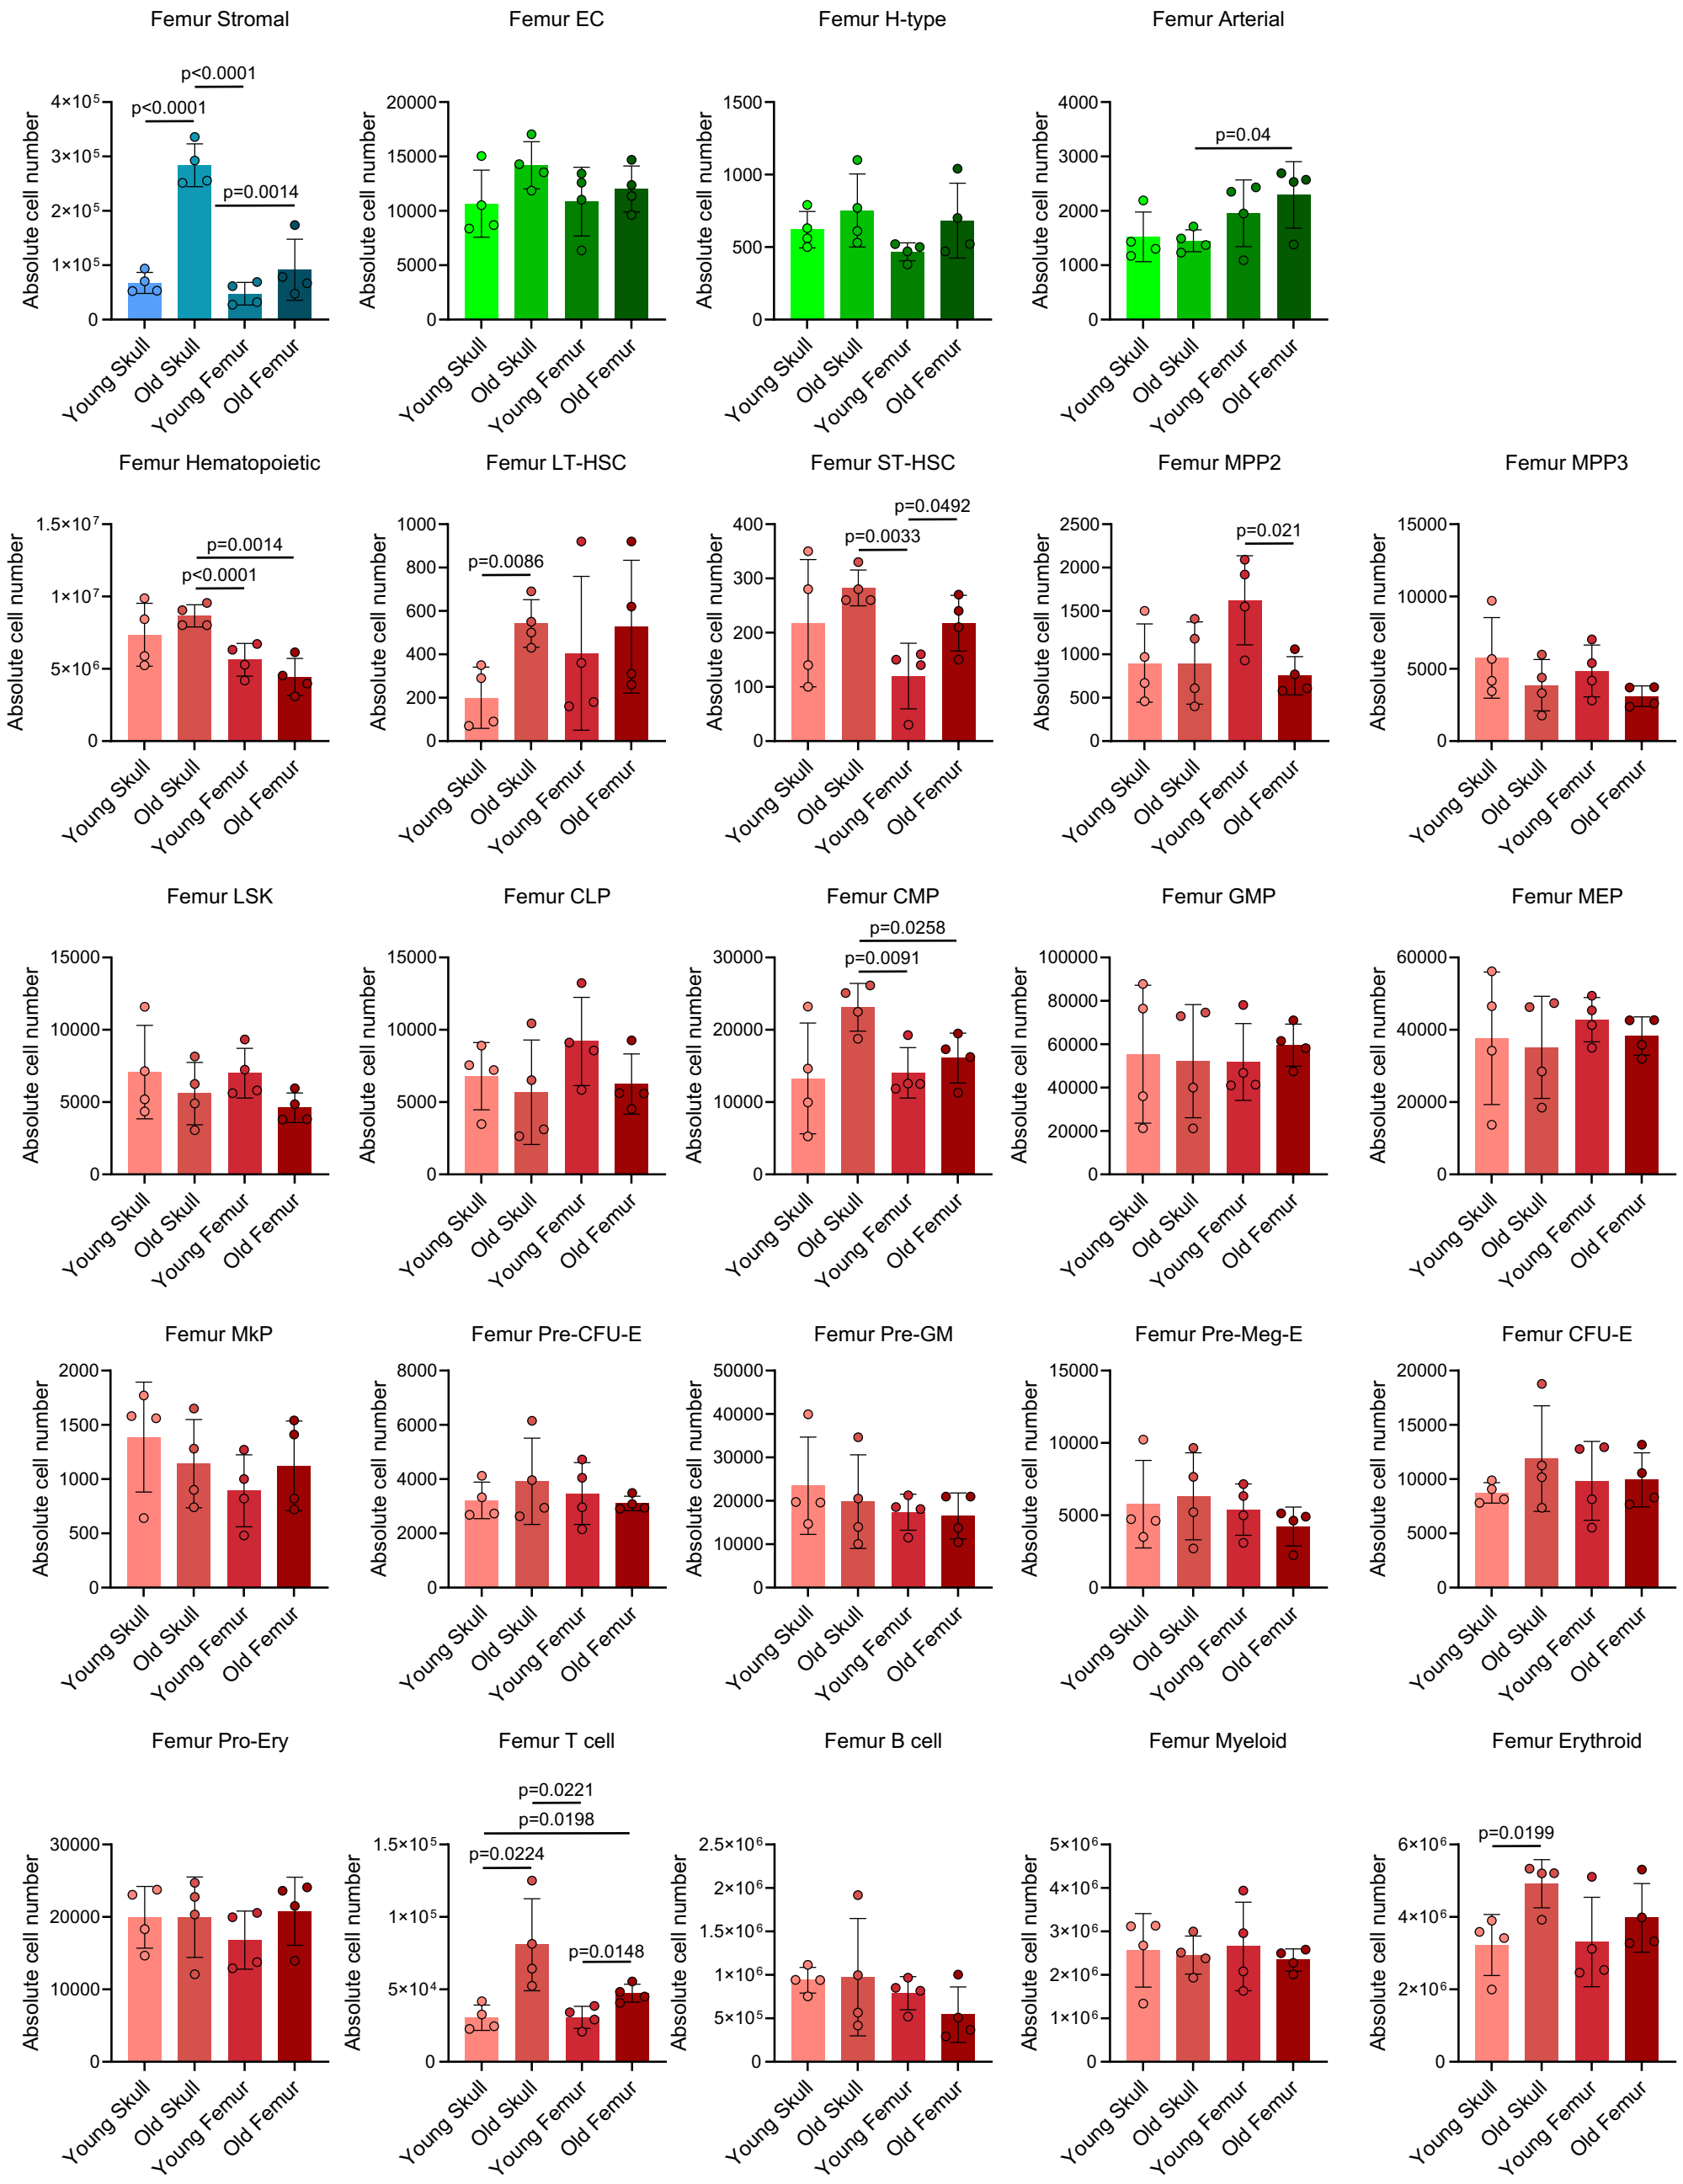

# Flow Cytometric Analysis of Skull BM after prostaglandin E2 (PGE2) Treatment

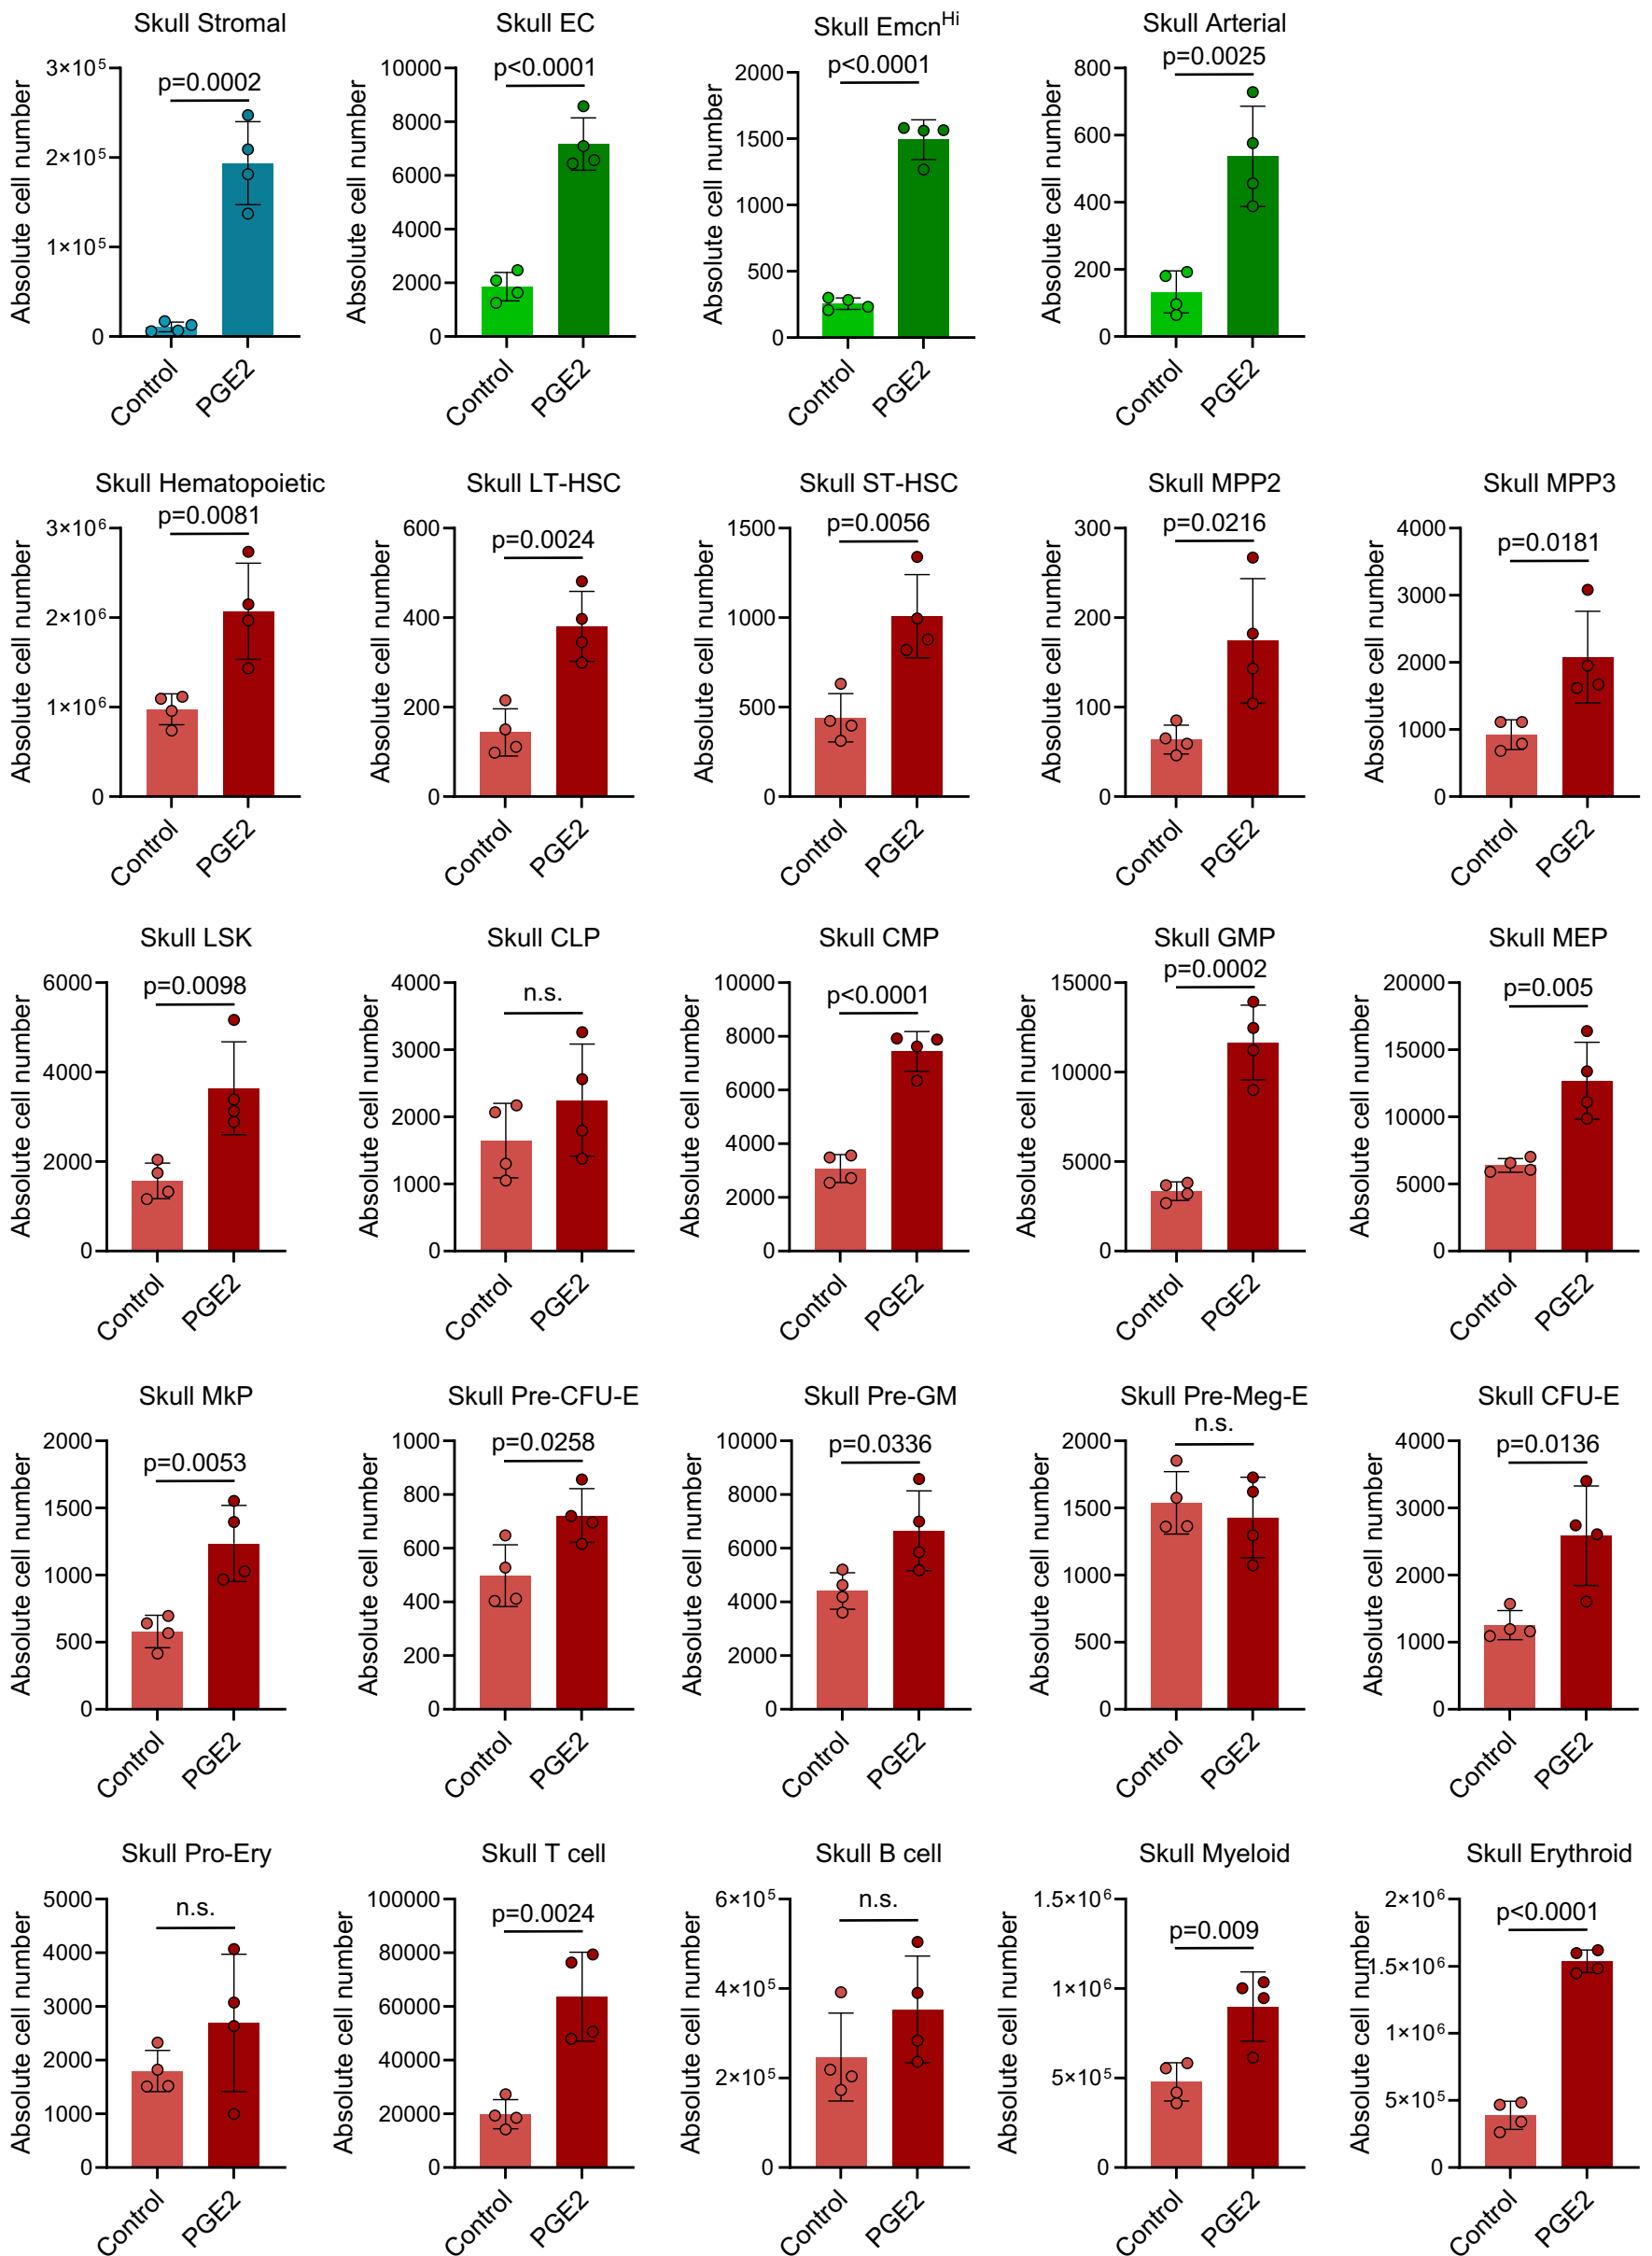

# Flow Cytometric Analysis of Femur BM after prostaglandin E2 (PGE2) Treatment

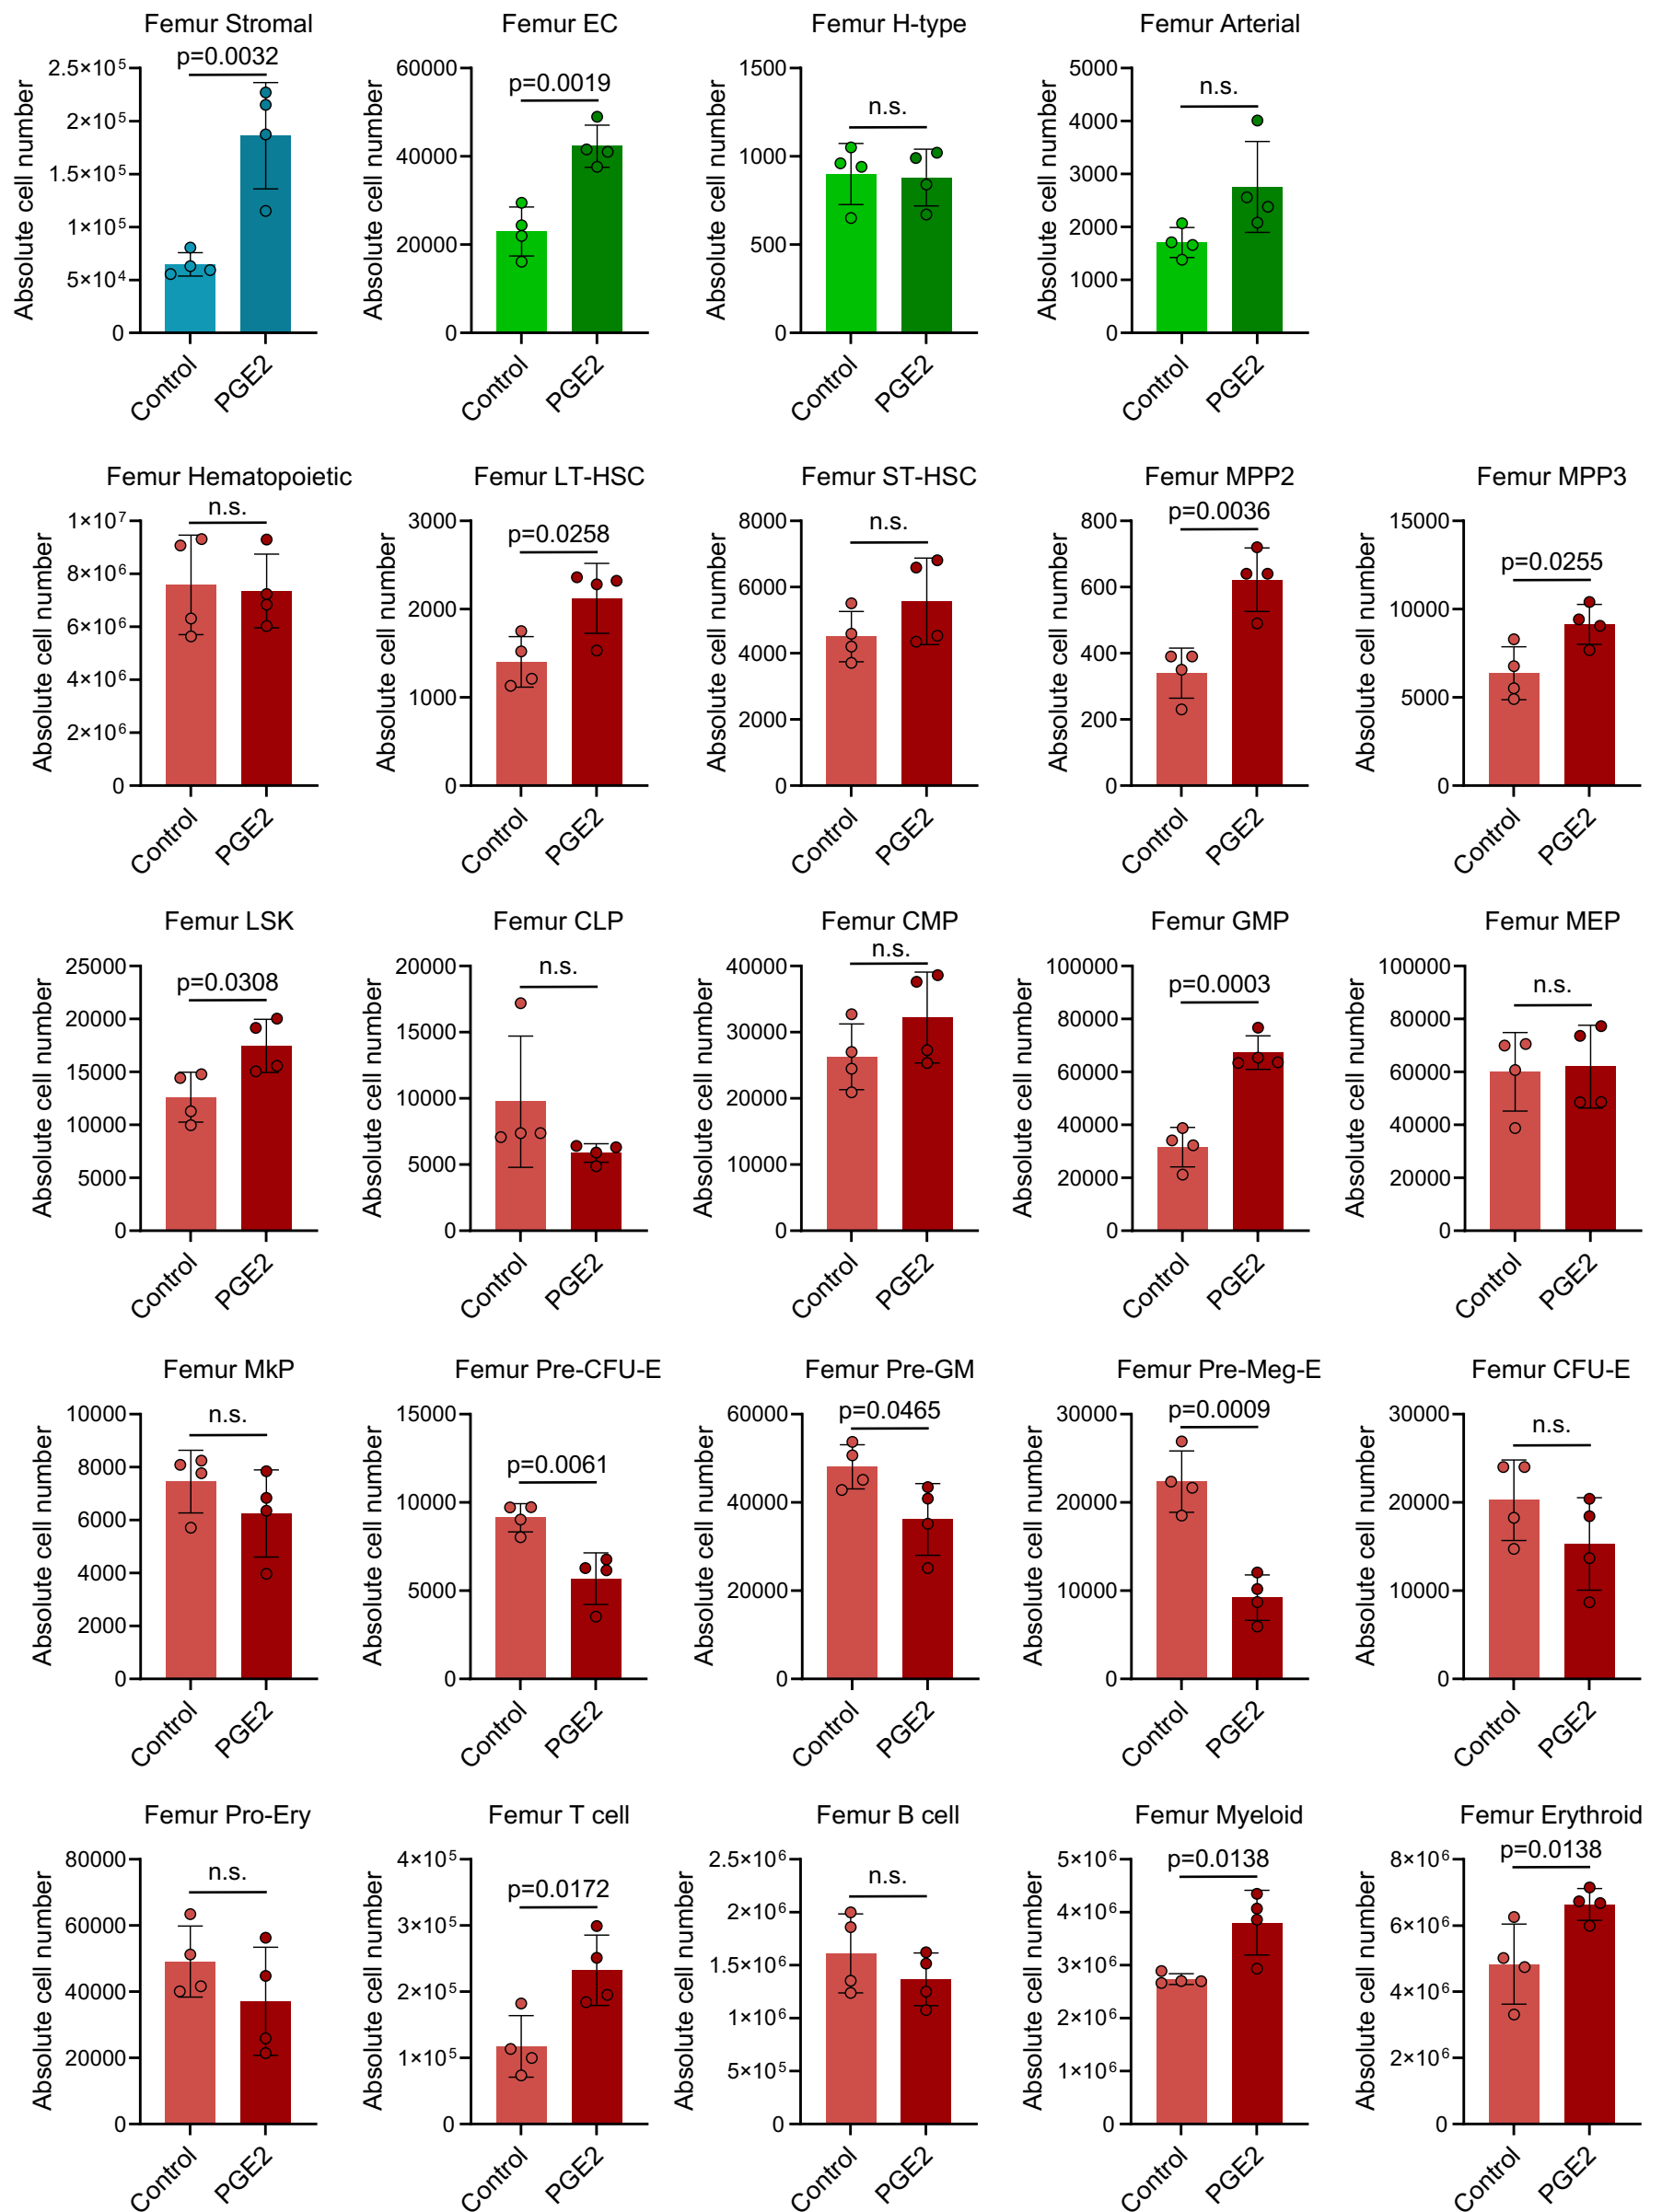



# Flow Cytometric Analysis of Skull BM after AMD3100 Treatment

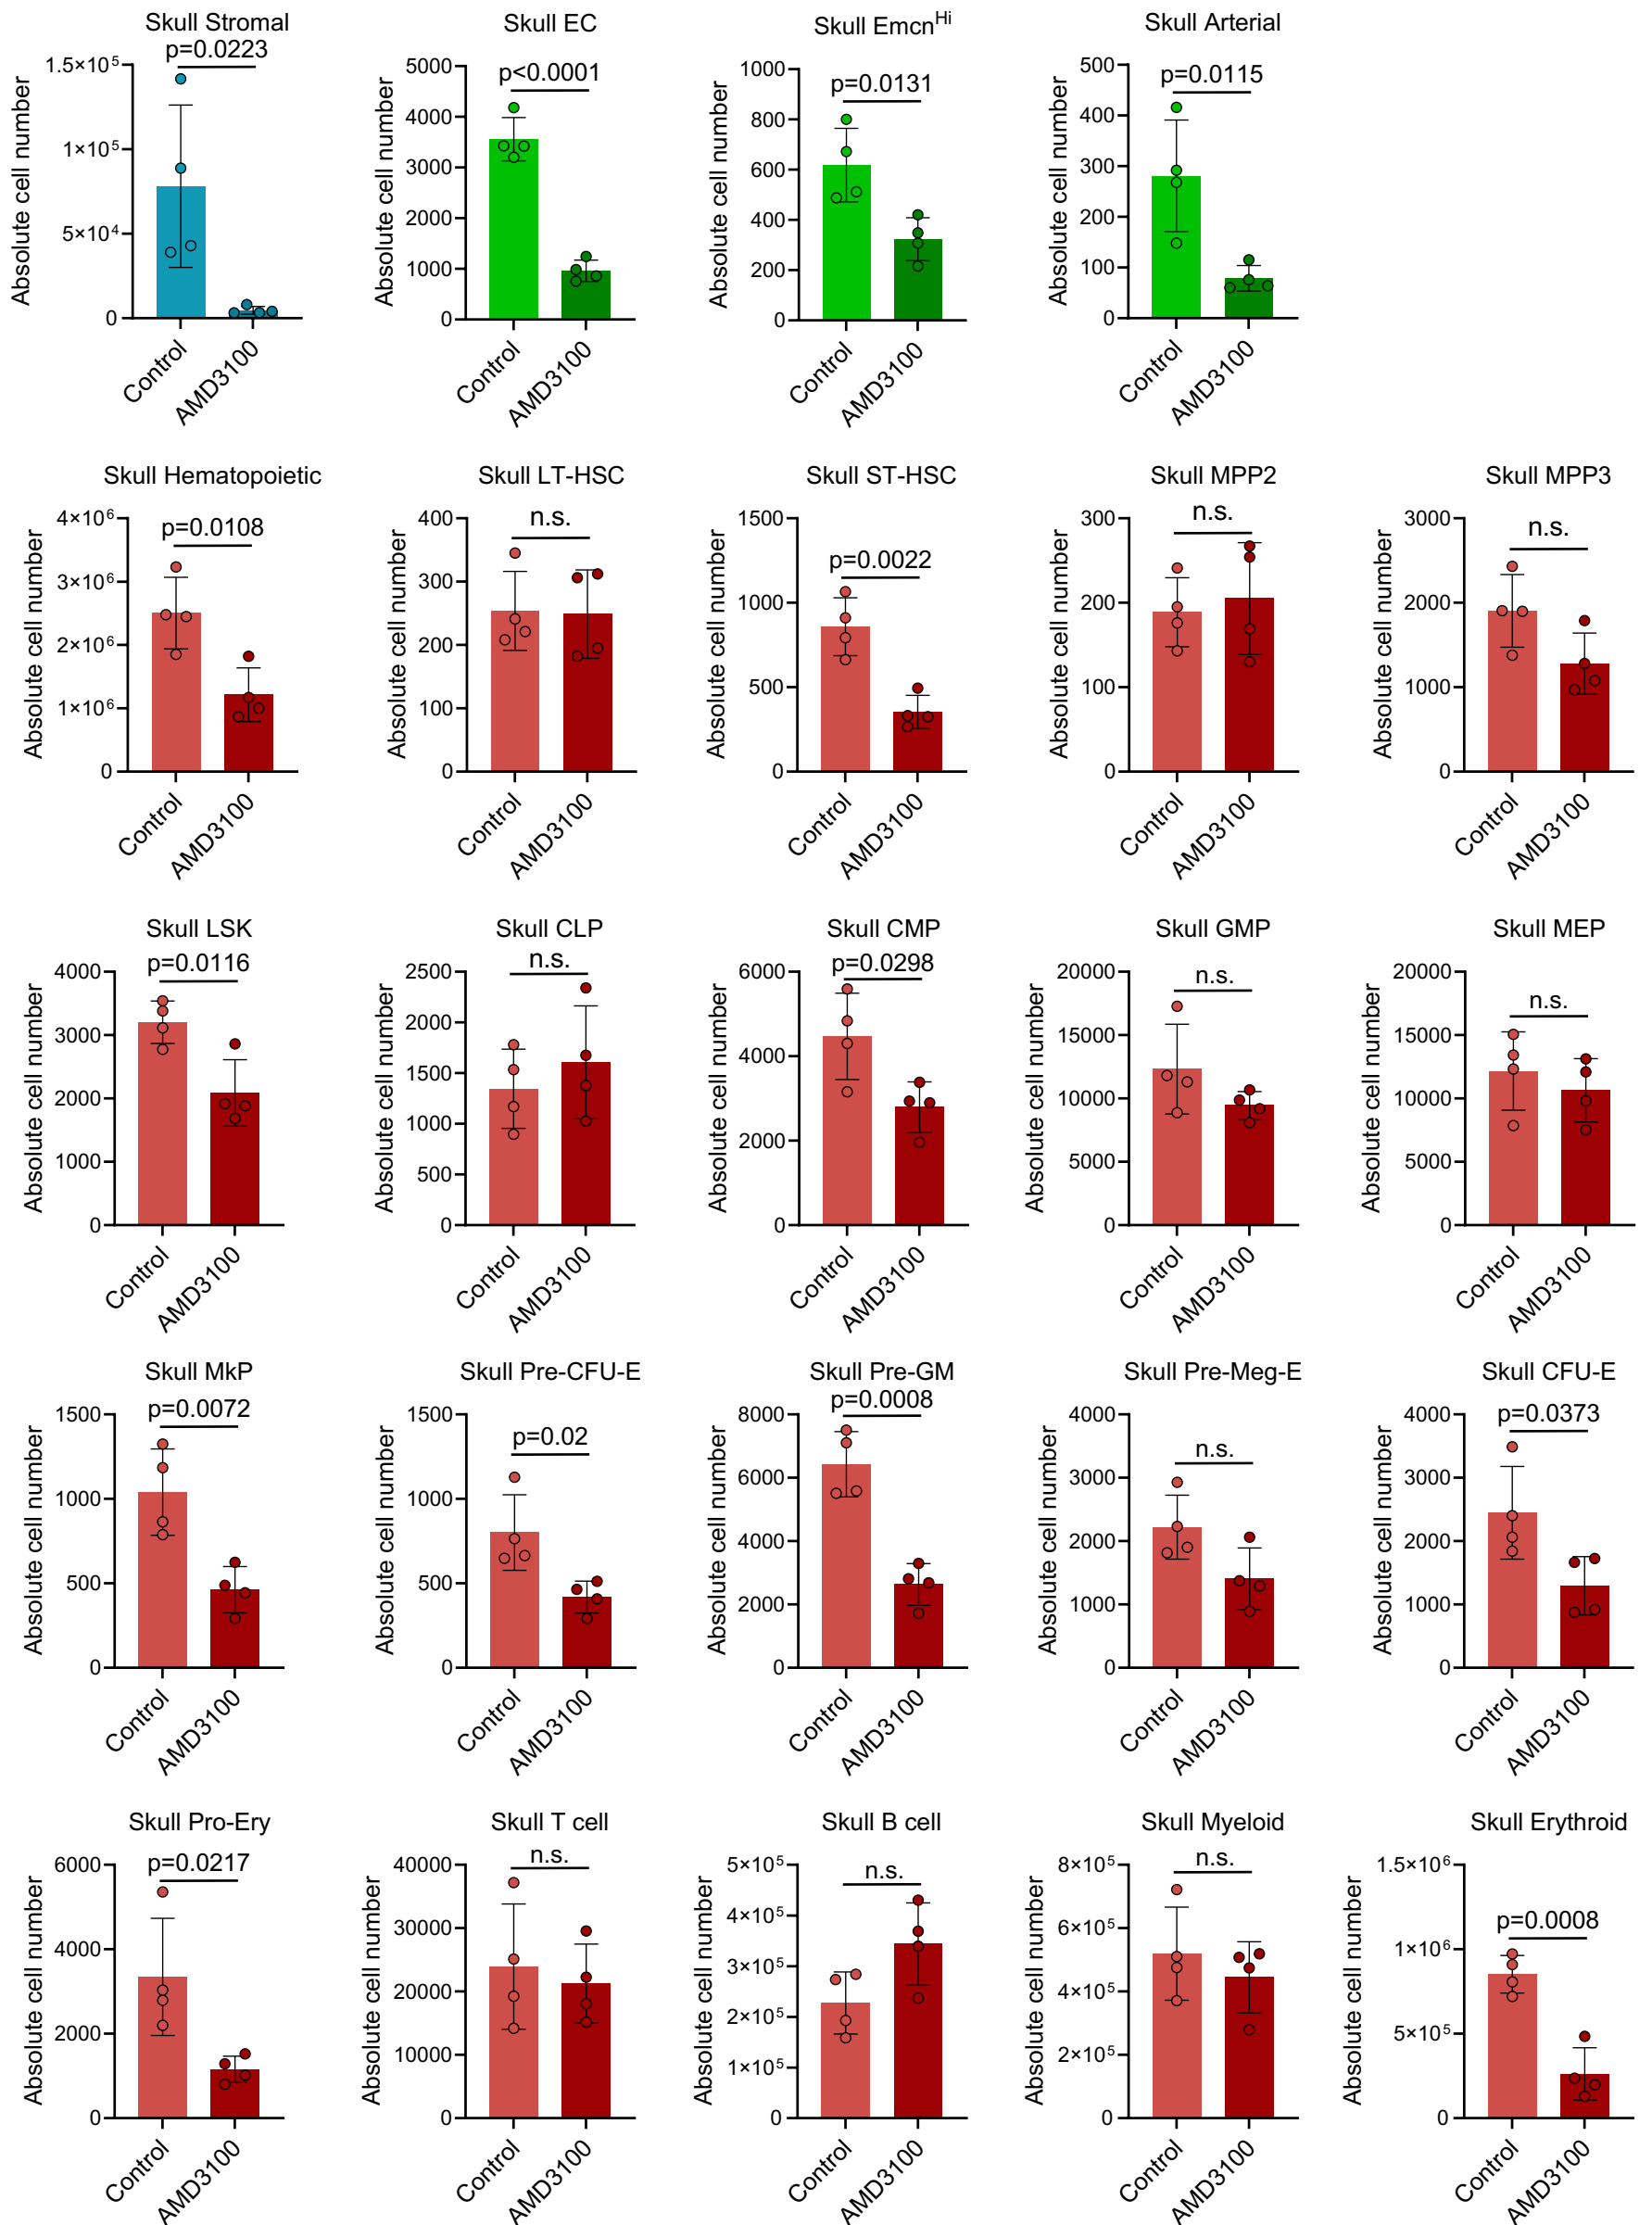

# Flow Cytometric Analysis of Femur BM after AMD3100 Treatment

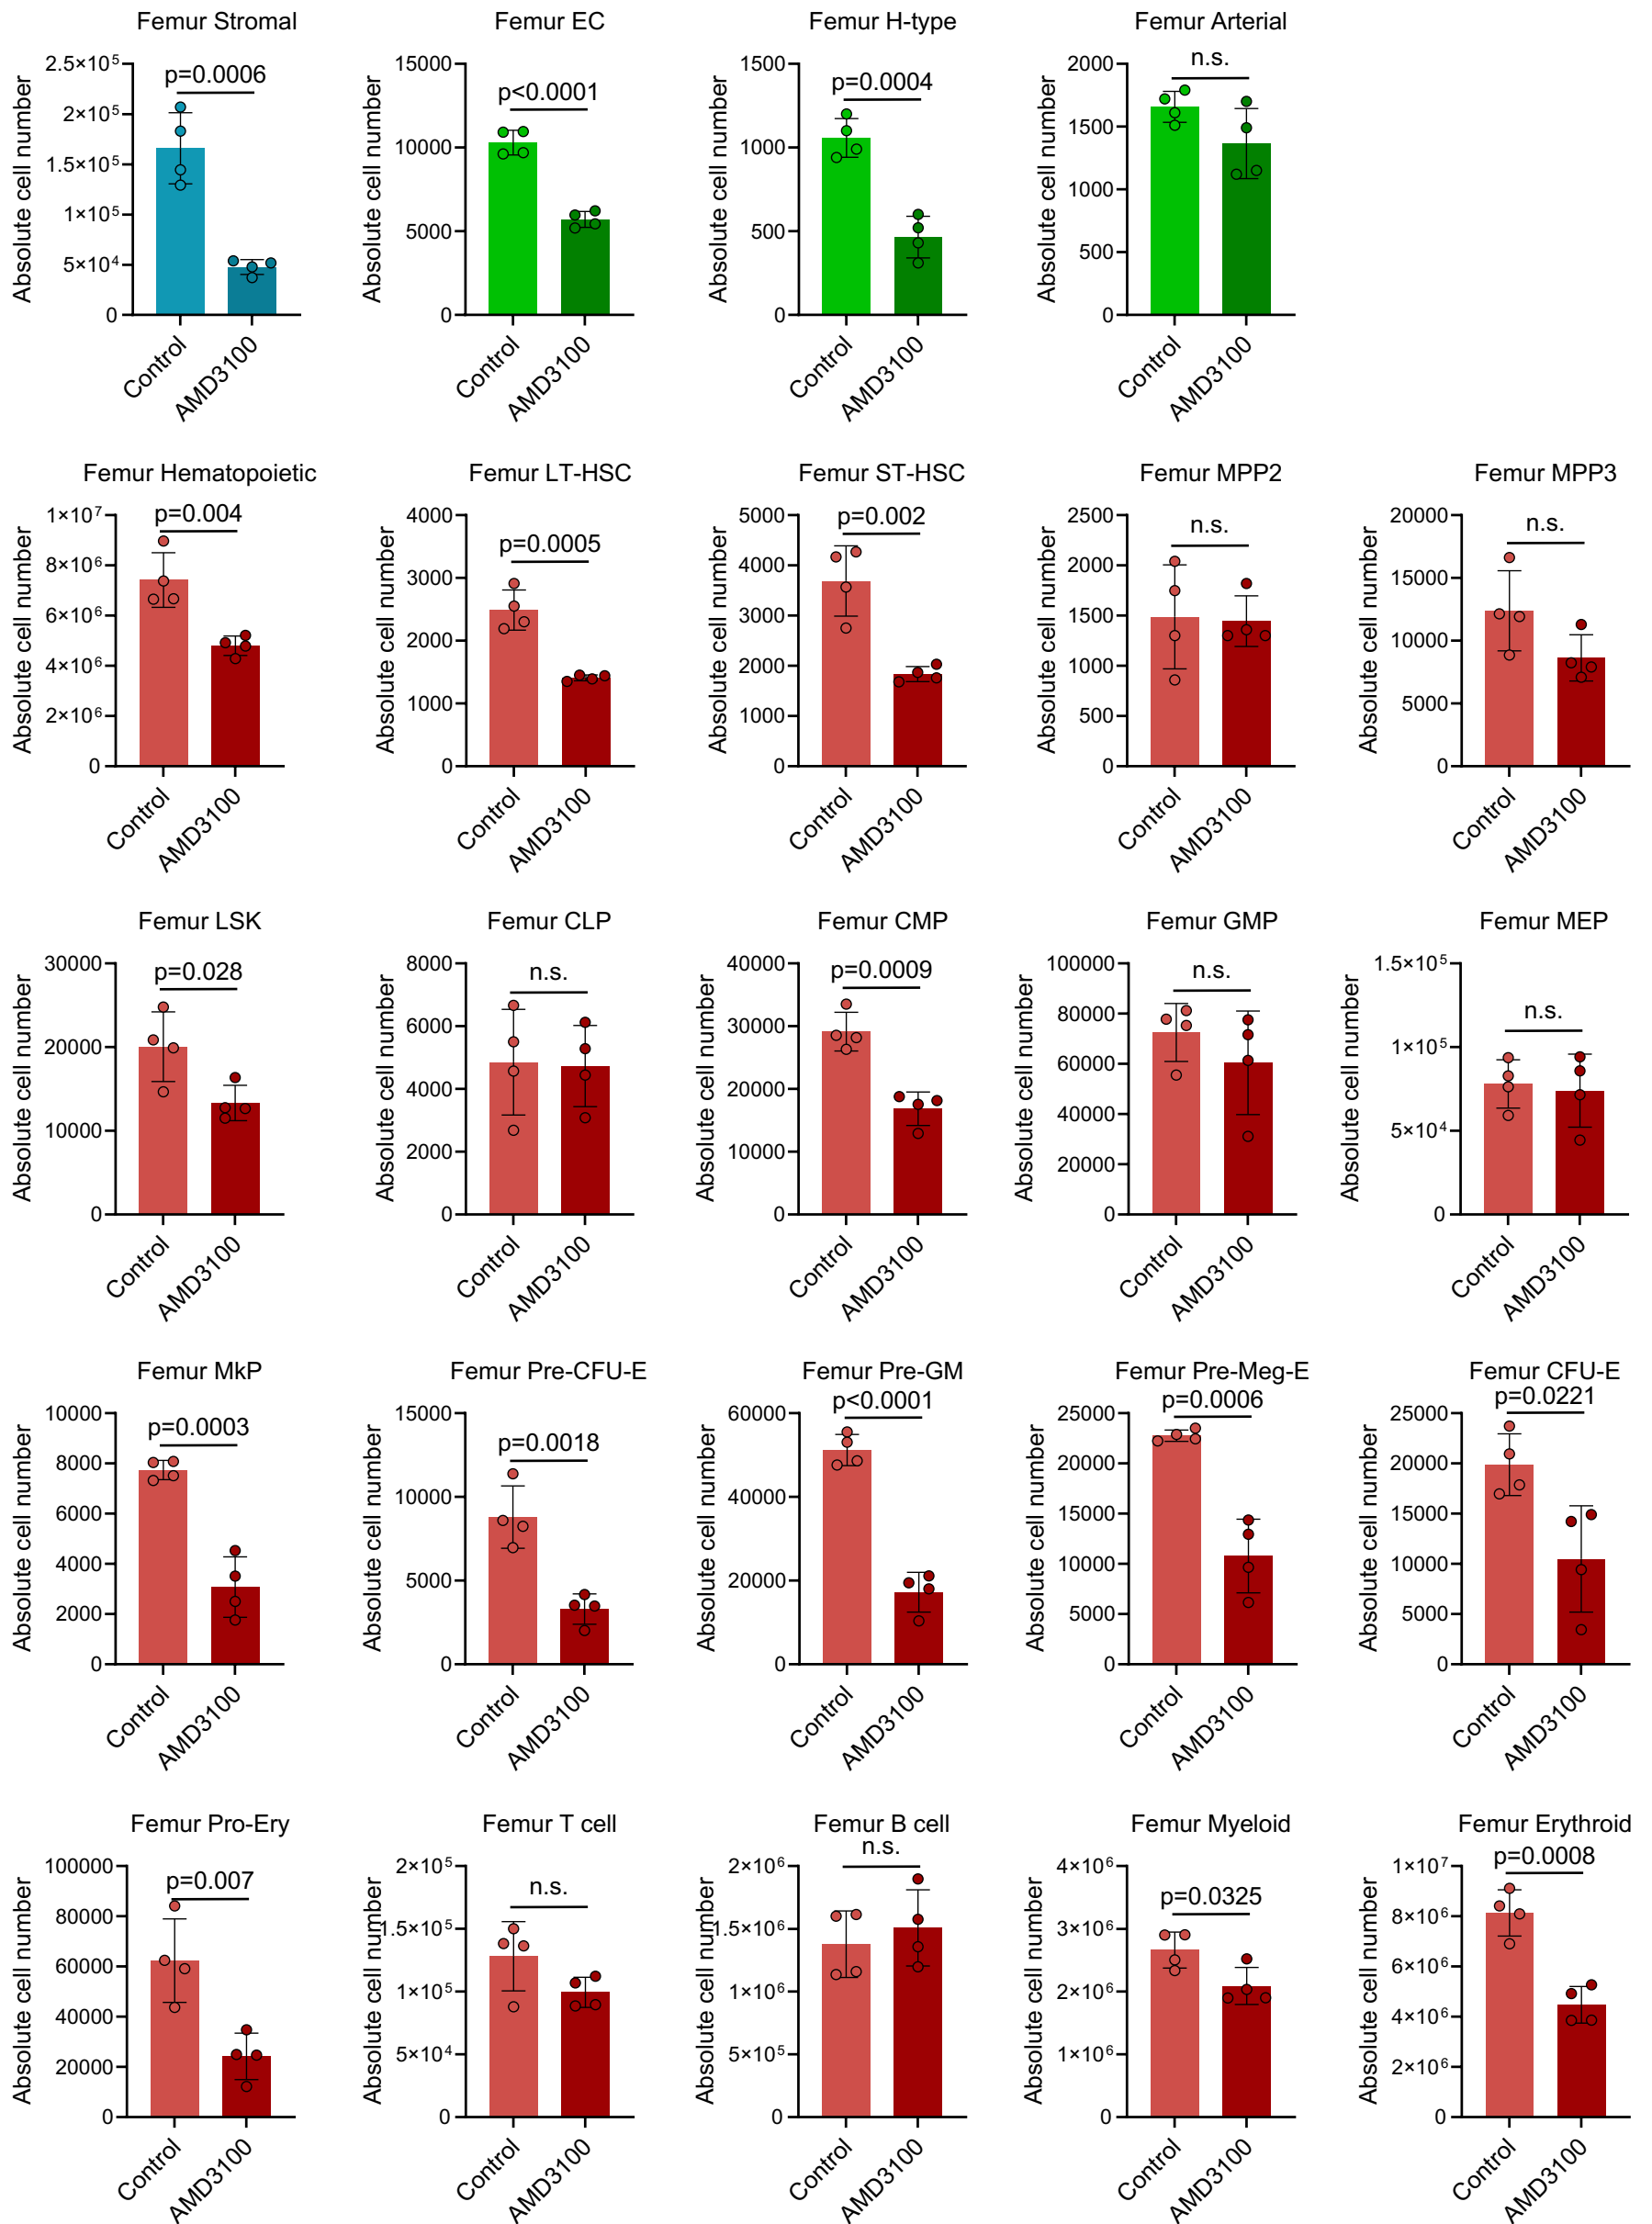

# Flow Cytometric Analysis of Skull BM with *pLIVE-Vegfa* Overexpression

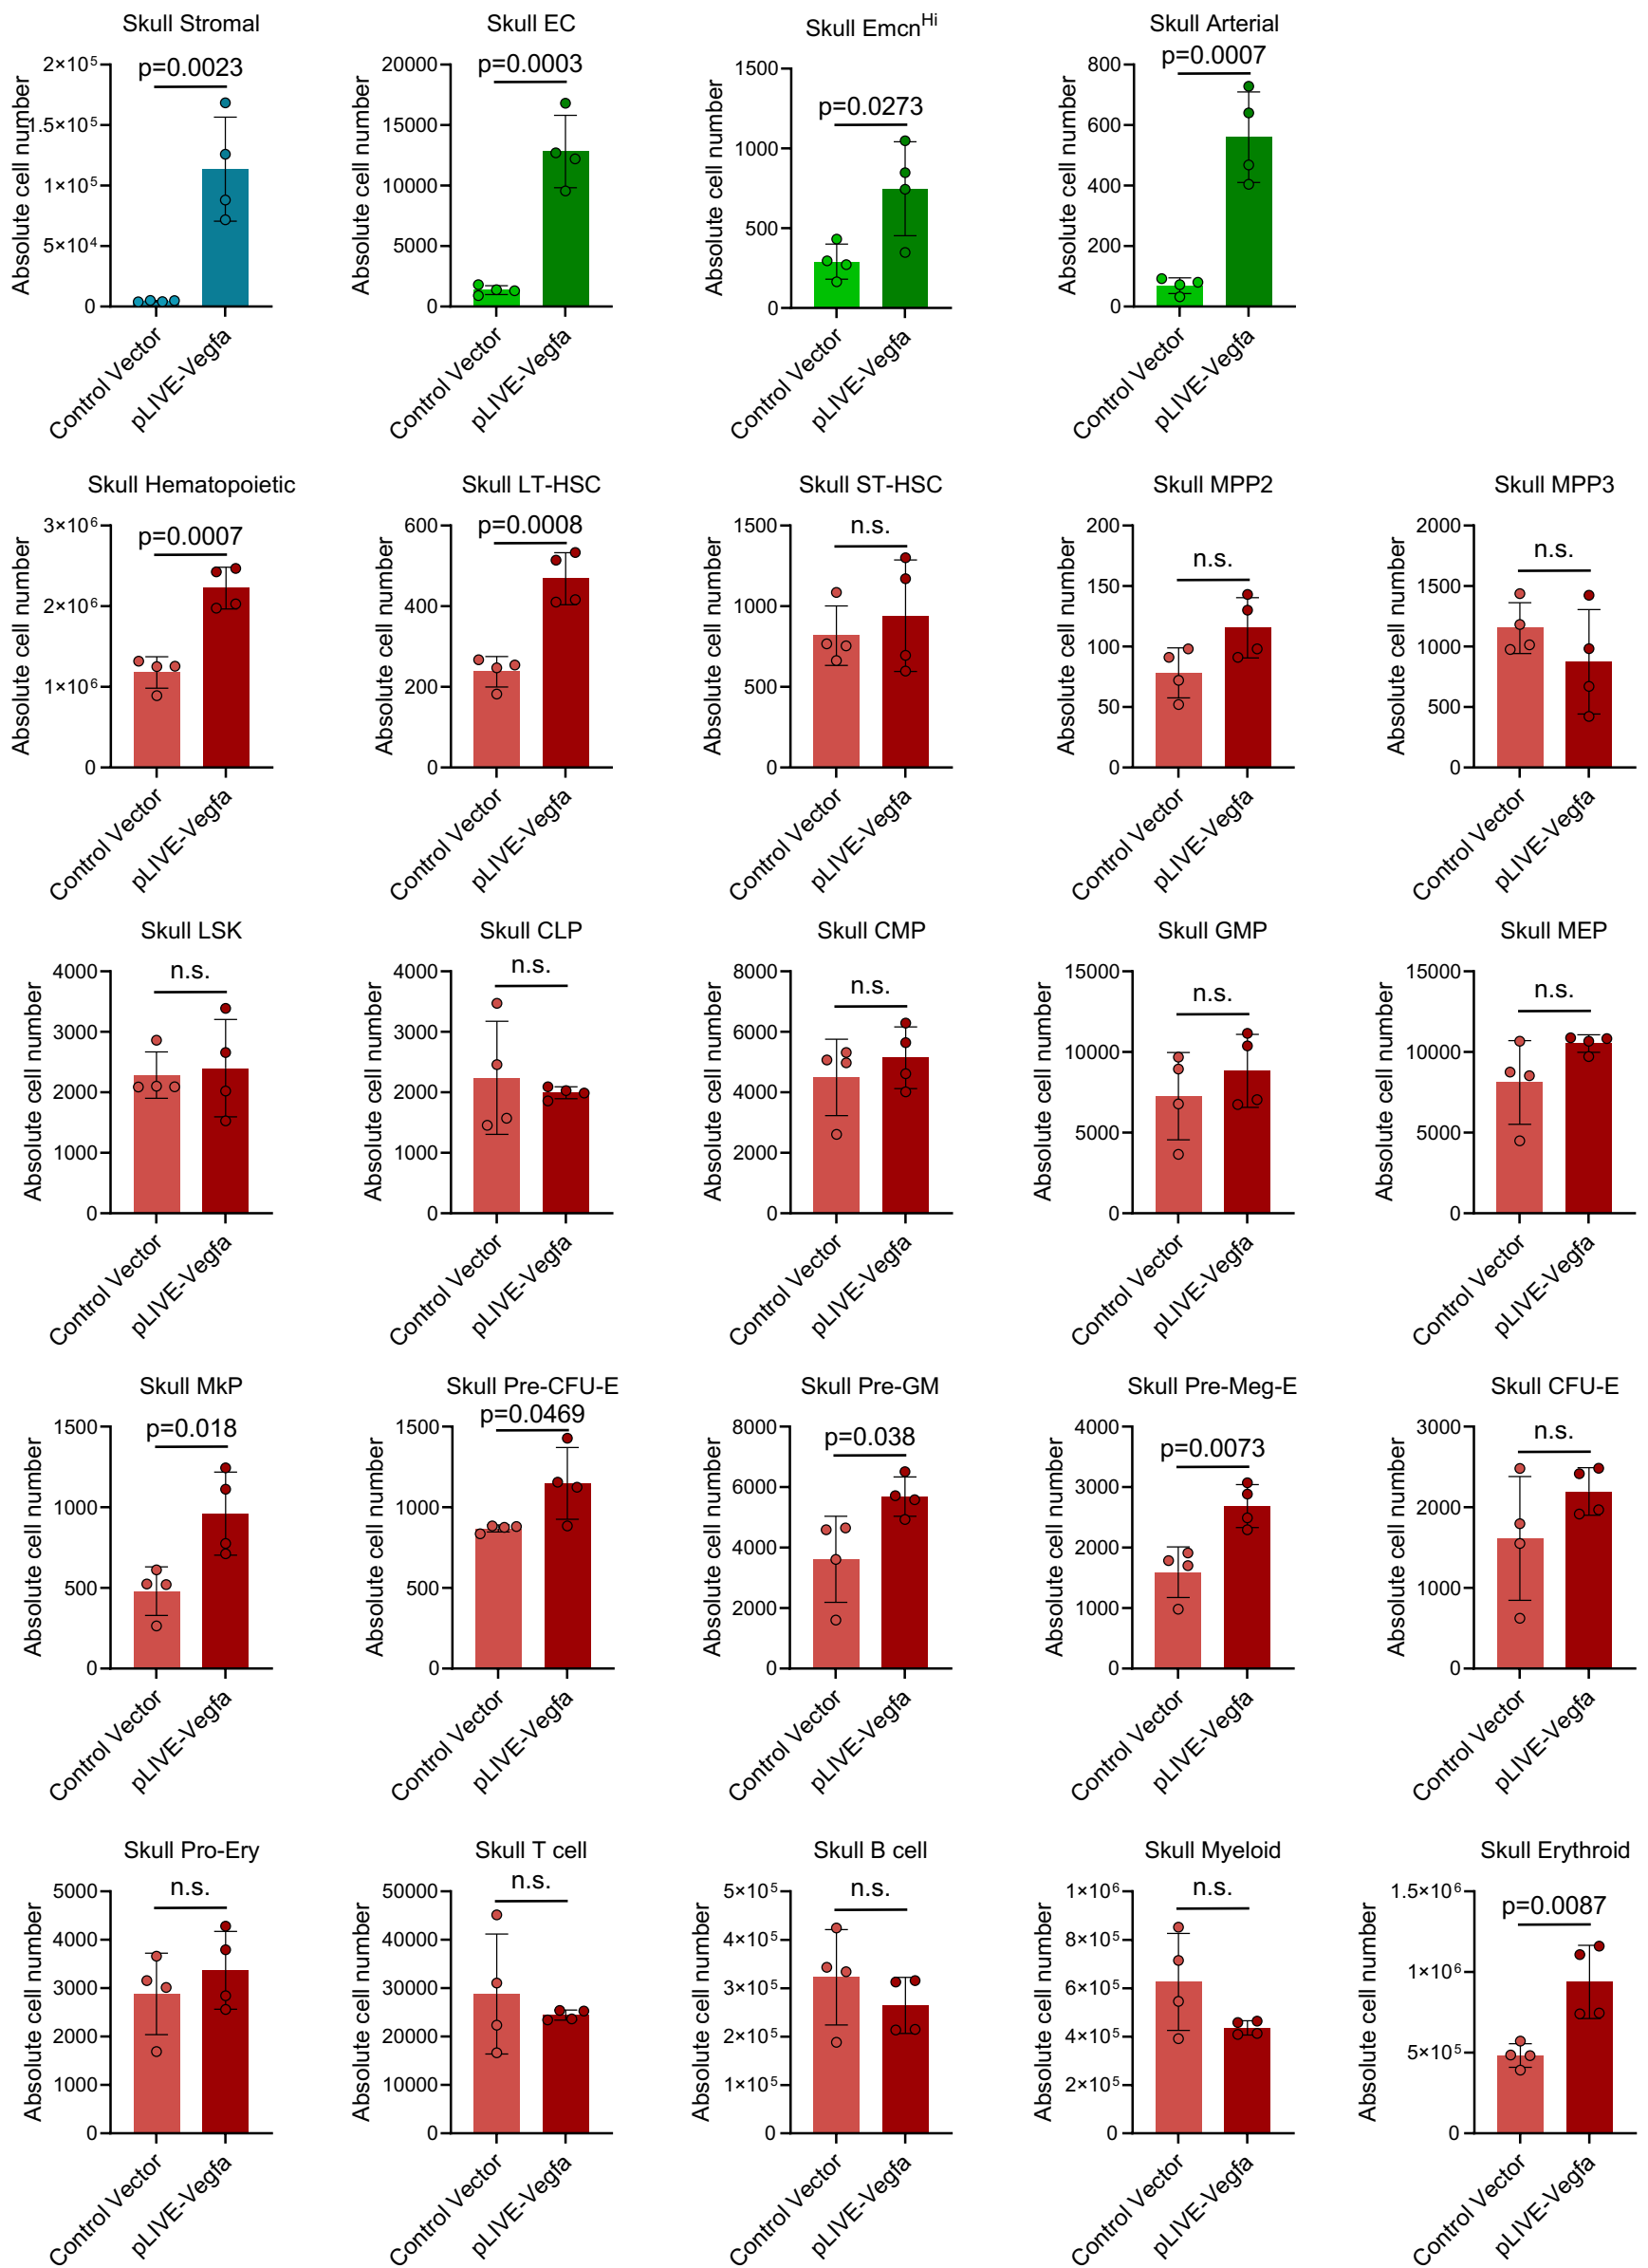

# Flow Cytometric Analysis of Femur BM with *pLIVE-Vegfa* Overexpression

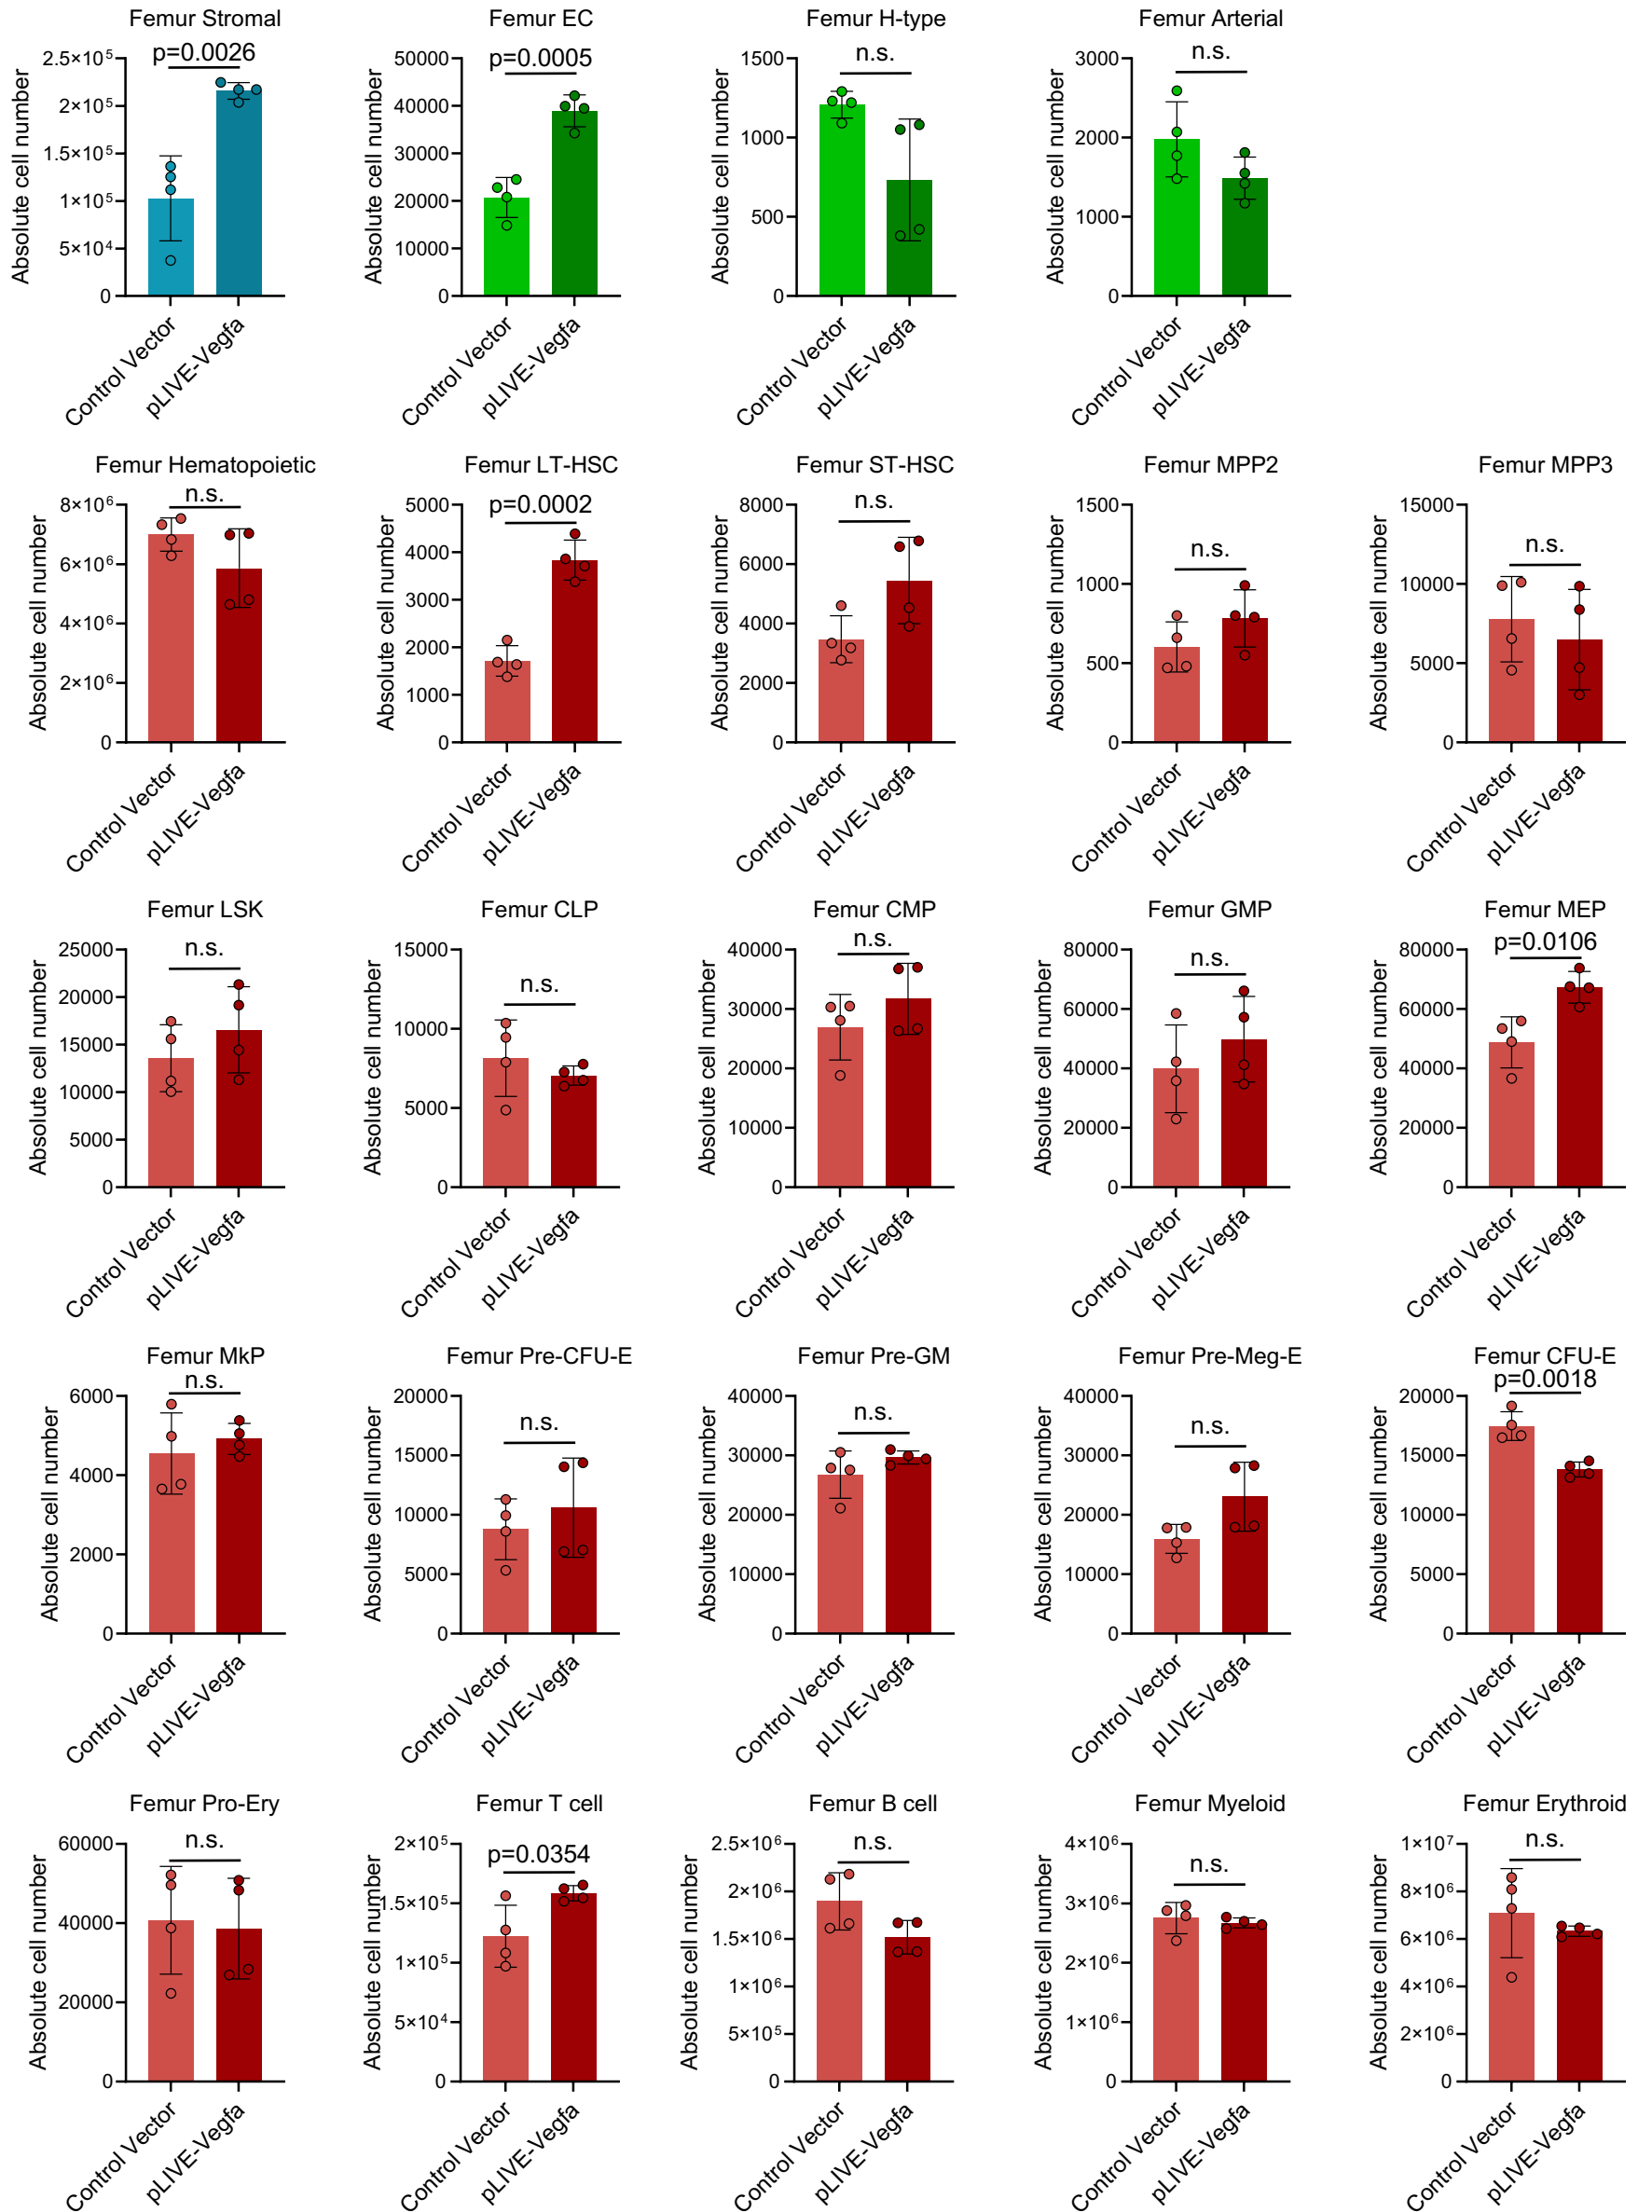

# Flow Cytometric Analysis of Skull BM after DC101 Treatment

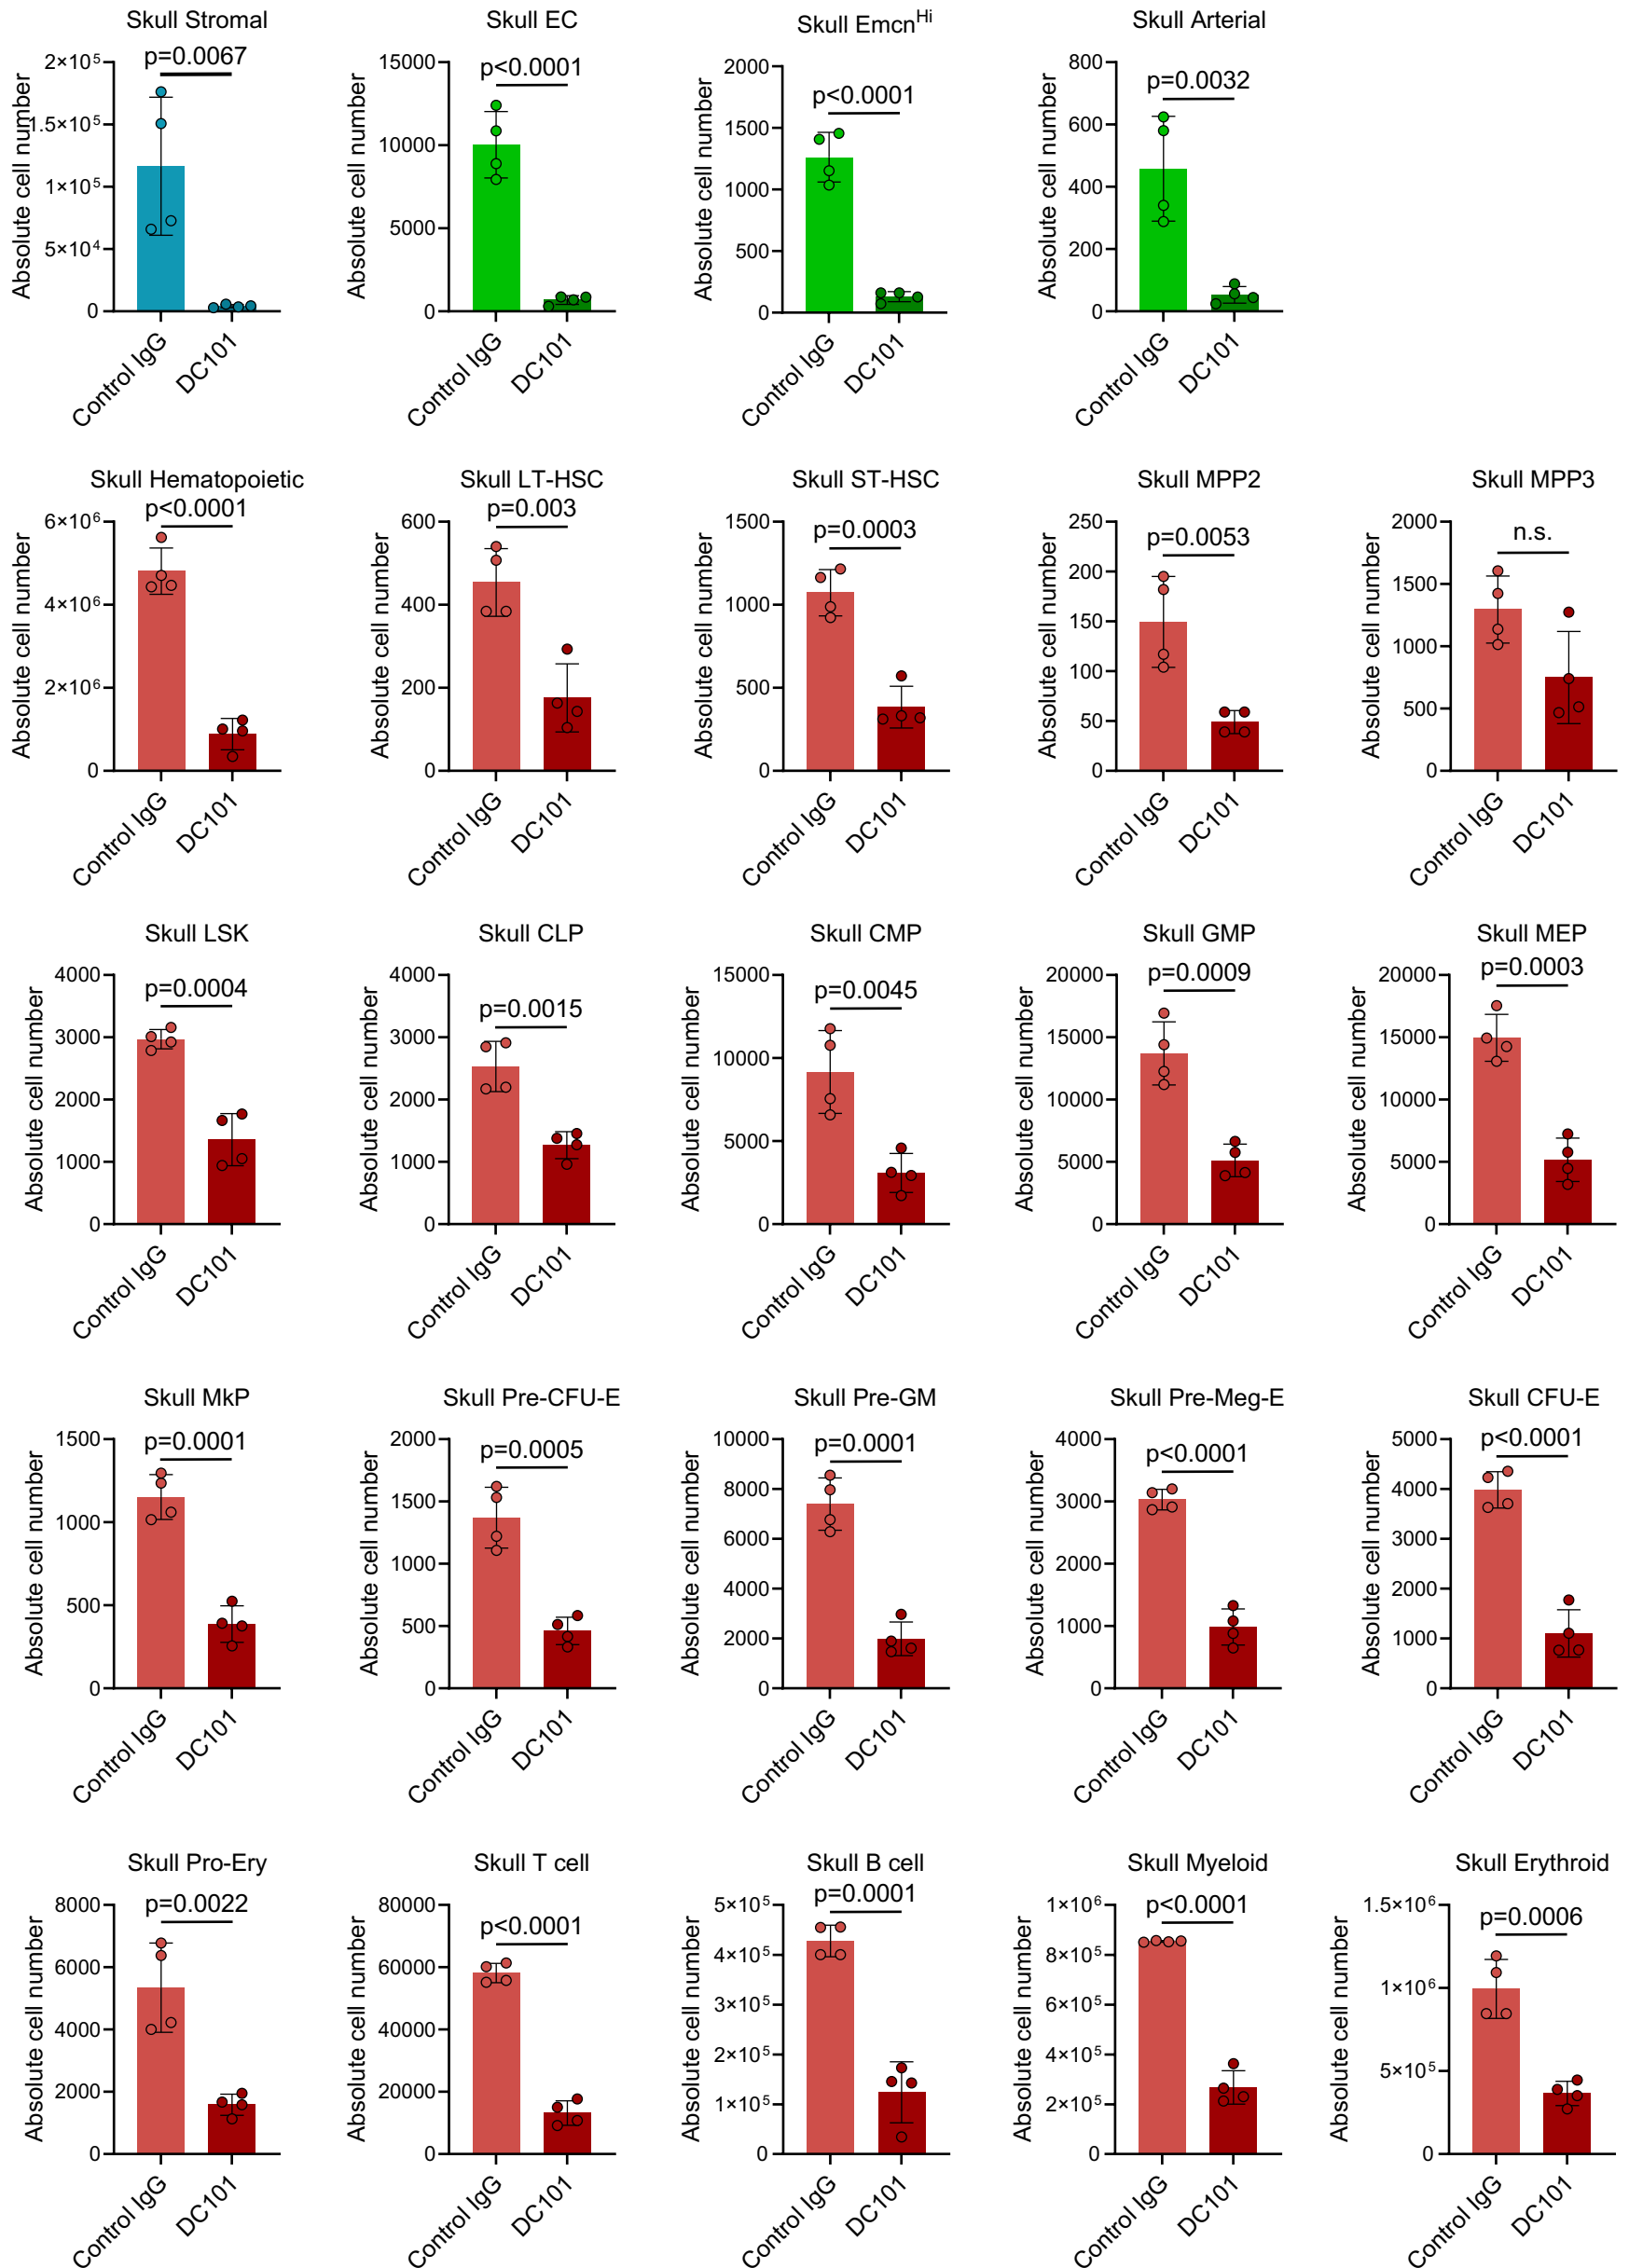

# Flow Cytometric Analysis of Femur BM after DC101 Treatment

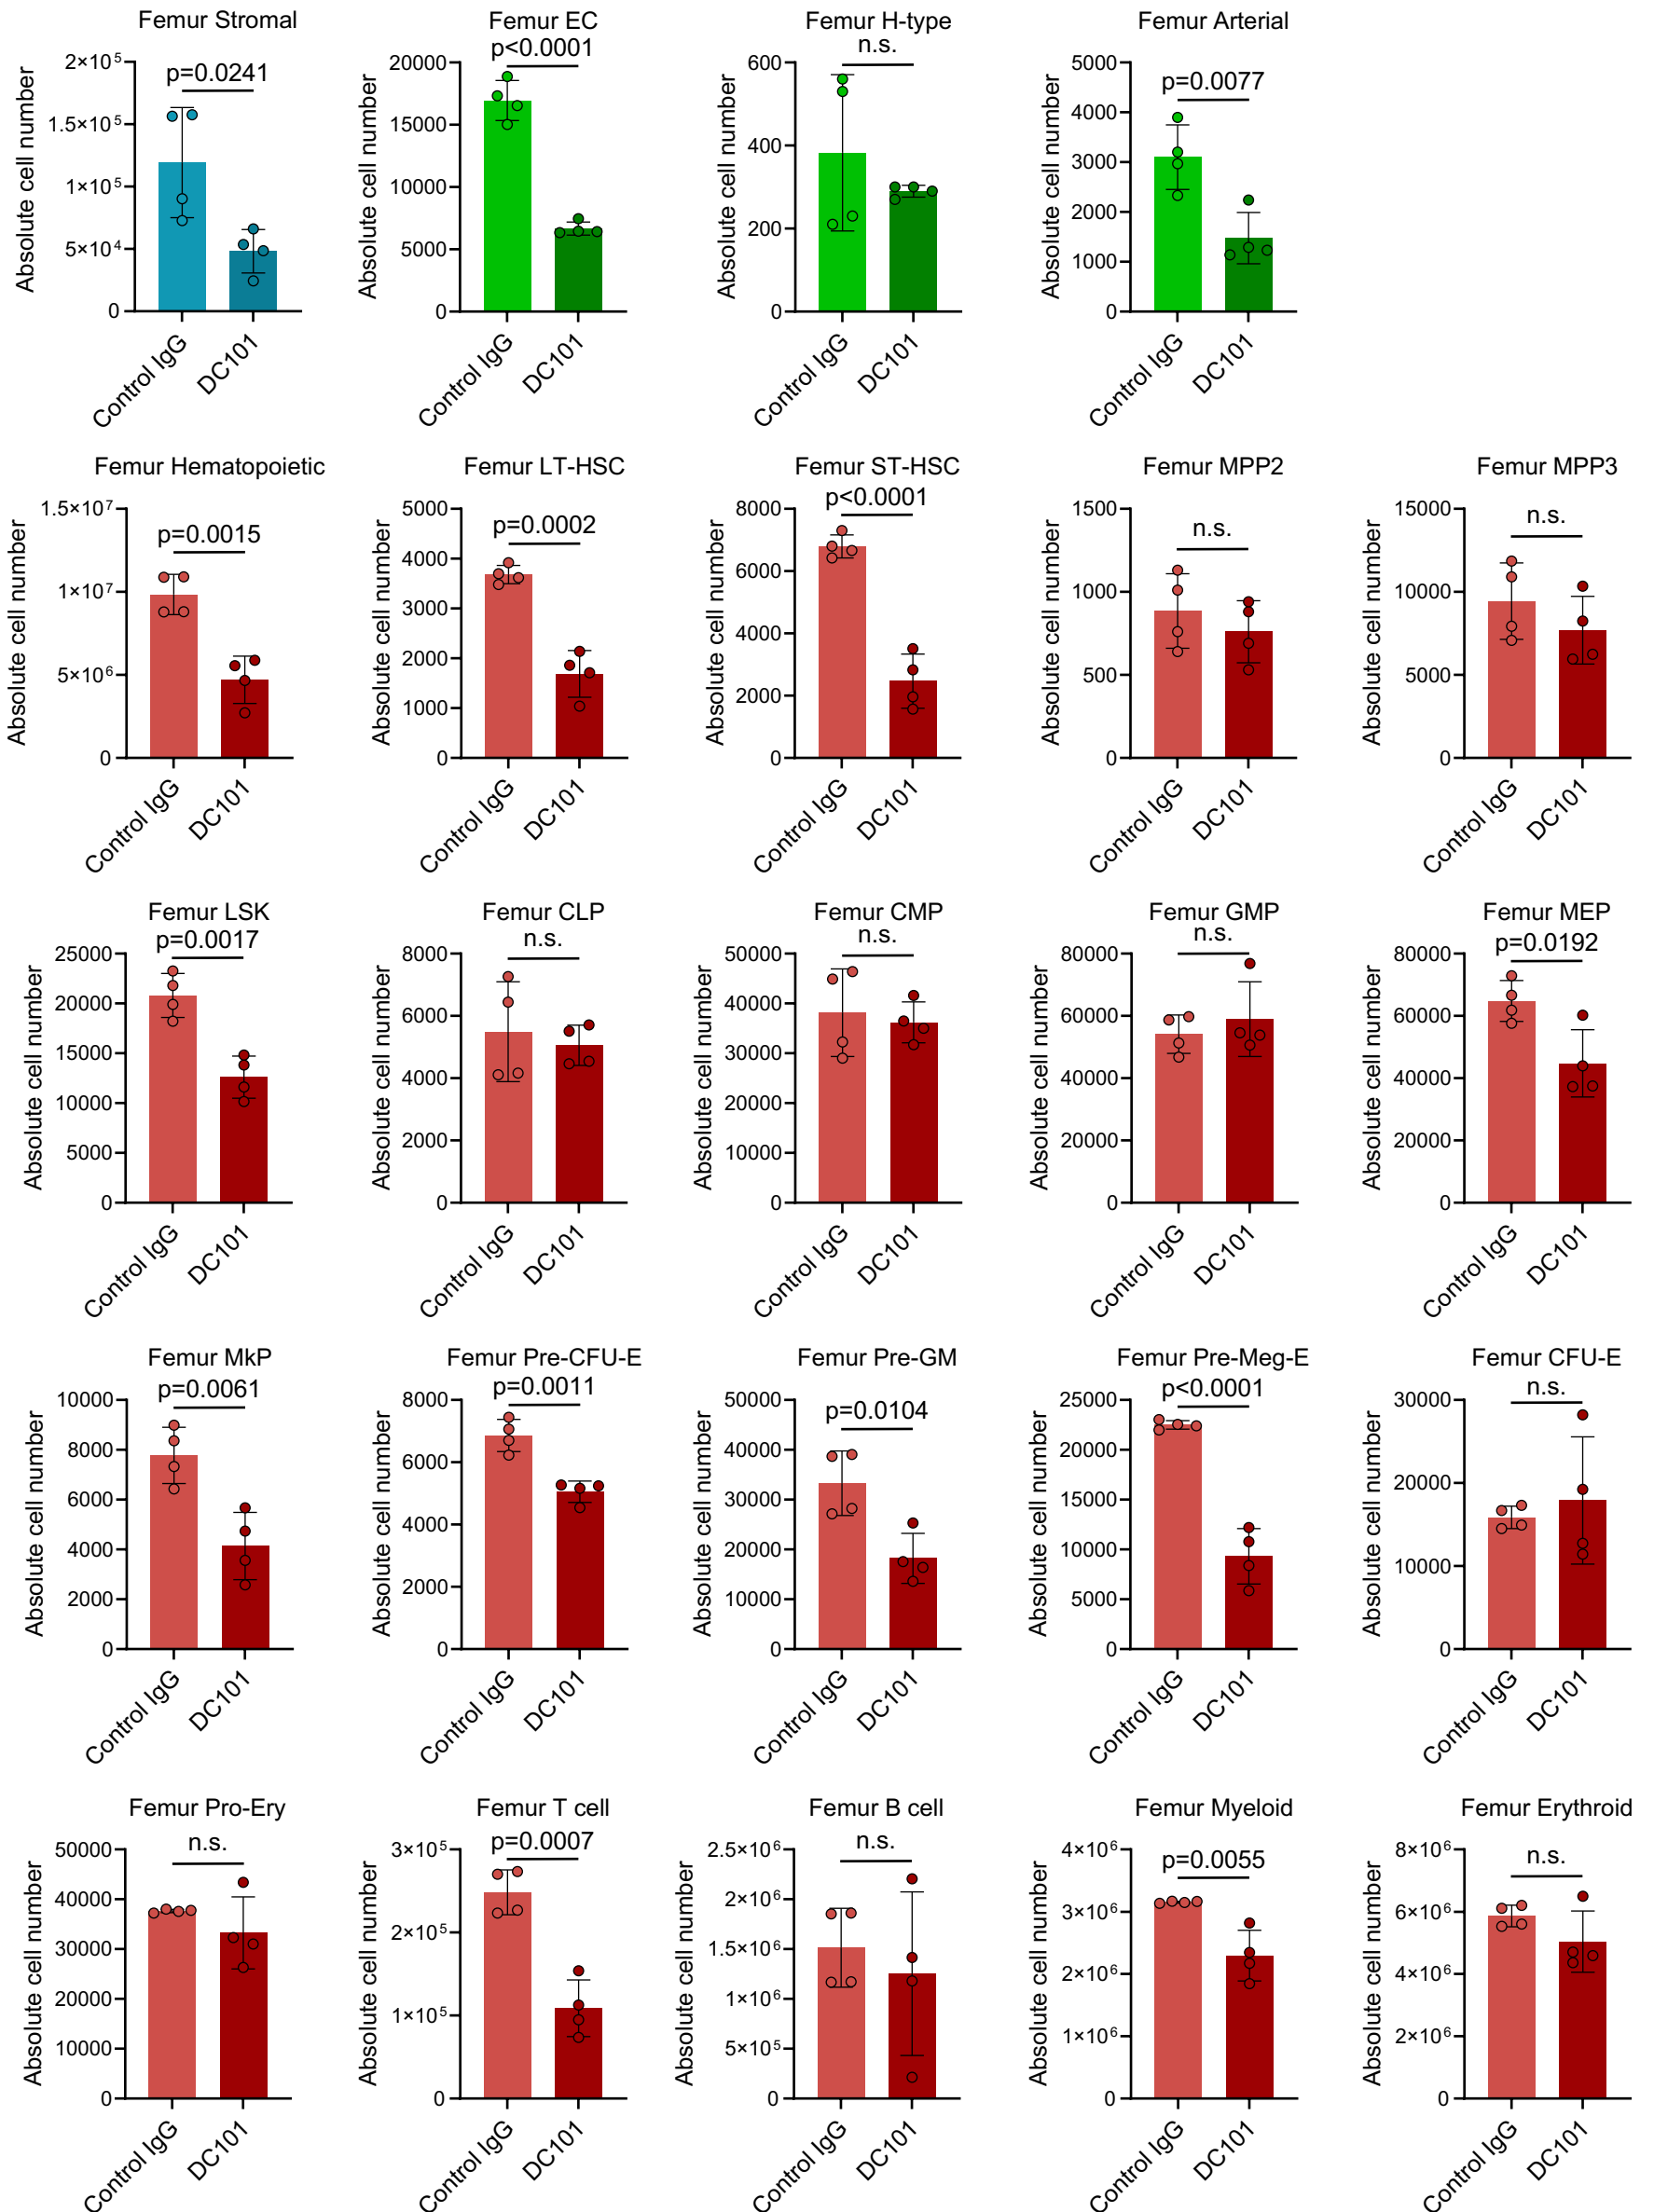

Supplement: 41586_2024_8163_MOESM2_ESM.pdf [file 41586_2024_8163_MOESM2_ESM.pdf]
