# Supplementary material for: Adult skull bone marrow is an expanding and resilient haematopoietic reservoir
Source: PubMed Central journal article supplement (PMC11618084; doi:10.1038/s41586-024-08163-9), 2024-11-13

# Adult skull bone marrow is an expanding and resilient hematopoietic reservoir

Bong Ihn Koh<sup>1,#</sup>, Vishal Mohanakrishnan<sup>1</sup>, Hyun-Woo Jeong<sup>2</sup>, Hongryeol Park<sup>1</sup>, Kai Kruse<sup>3</sup>, Young Jun Choi<sup>4</sup>, Melina Nieminen-Kelhä<sup>5</sup>, Rahul Kumar<sup>6</sup>, Raquel S. Pereira<sup>7</sup>, , Susanne Adams<sup>1</sup>, Hyuek Jong Lee<sup>8</sup>, M. Gabriele Bixel<sup>1</sup>, Peter Vajkoczy<sup>5</sup>, Daniela S. Krause<sup>6</sup>, Ralf H. Adams<sup>1,#</sup>

## Supplementary Data File 2

Gating strategies for all FACS isolation and flow cytometric analyses performed in the study.

### Table of contents

- a) Representative gating strategy for FACS isolation and flow cytometric analysis of HSPCs
- b) Representative gating strategy for flow cytometric analysis of myeloid cells
- c) Representative gating strategy for flow cytometric analysis of photo-converted RFP<sup>+</sup> cells
- d) Representative gating strategy for flow cytometric analysis of hematopoietic progenitors
- e) Representative gating strategy for flow cytometric analysis of hematopoietic precursors
- f) Representative gating strategy for flow cytometric analysis of lymphocytes and myeloid cells
- g) Representative gating strategy for flow cytometric analysis of hematopoietic, stromal and endothelial cells
- h) Representative gating strategy for flow cytometric analysis of lymphocytes and myeloid cells in peripheral blood

# Adult skull bone marrow is an expanding and resilient hematopoietic reservoir

Bong Ihn Koh<sup>1,#</sup>, Vishal Mohanakrishnan<sup>1</sup>, Hyun-Woo Jeong<sup>2</sup>, Hongryeol Park<sup>1</sup>, Kai Kruse<sup>3</sup>, Young Jun Choi<sup>4</sup>, Melina Nieminen-Kelhä<sup>5</sup>, Rahul Kumar<sup>6</sup>, Raquel S. Pereira<sup>7</sup>, , Susanne Adams<sup>1</sup>, Hyuek Jong Lee<sup>8</sup>, M. Gabriele Bixel<sup>1</sup>, Peter Vajkoczy<sup>5</sup>, Daniela S. Krause<sup>6</sup>, Ralf H. Adams<sup>1,#</sup>

## Supplementary Data File 1

### Abbreviations

EC: Endothelial Cell

Emcn<sup>Hi</sup>: Endomucin-High

LT-HSC: Long-Term Hematopoietic Stem Cell

ST-HSC: Short-Term Hematopoietic Stem Cell

MPP2: Multi-Potent Progenitor 2

MPP3: Multi-Potent Progenitor 3

LSK: Lin<sup>-</sup> Sca1<sup>+</sup> cKit<sup>+</sup>

CLP: Common Lymphoid Progenitor

CMP: Common Myeloid Progenitor

GMP: Granulocyte-Monocyte Progenitor

MEP: Megakaryocyte-Erythrocyte Progenitor

MkP: Megakaryocyte Progenitor

Pre-GM: Pre-Granulocyte-Monocyte

Pre-CFU-E: Pre-Colony-Forming Unit-Erythroid

Pre-Meg-E: Pre-Megakaryocyte-Erythroid

CFU-E: Colony-Forming Unit-Erythroid

Pro-Ery: Pro-Erythroid

**a**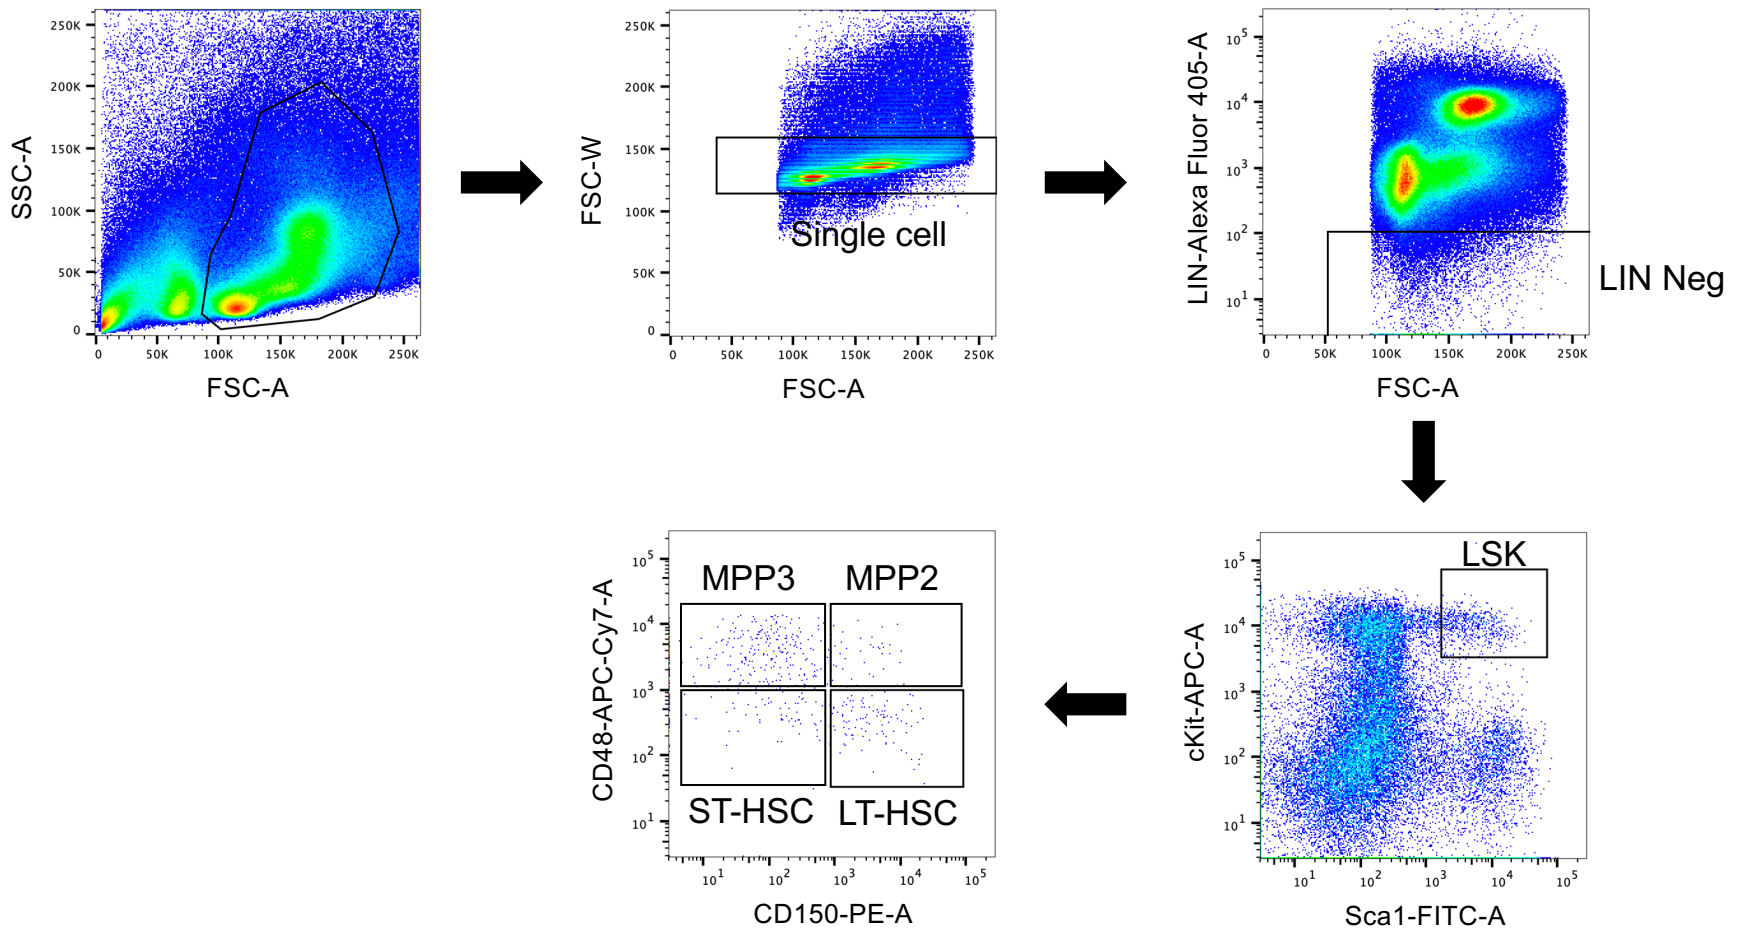**b**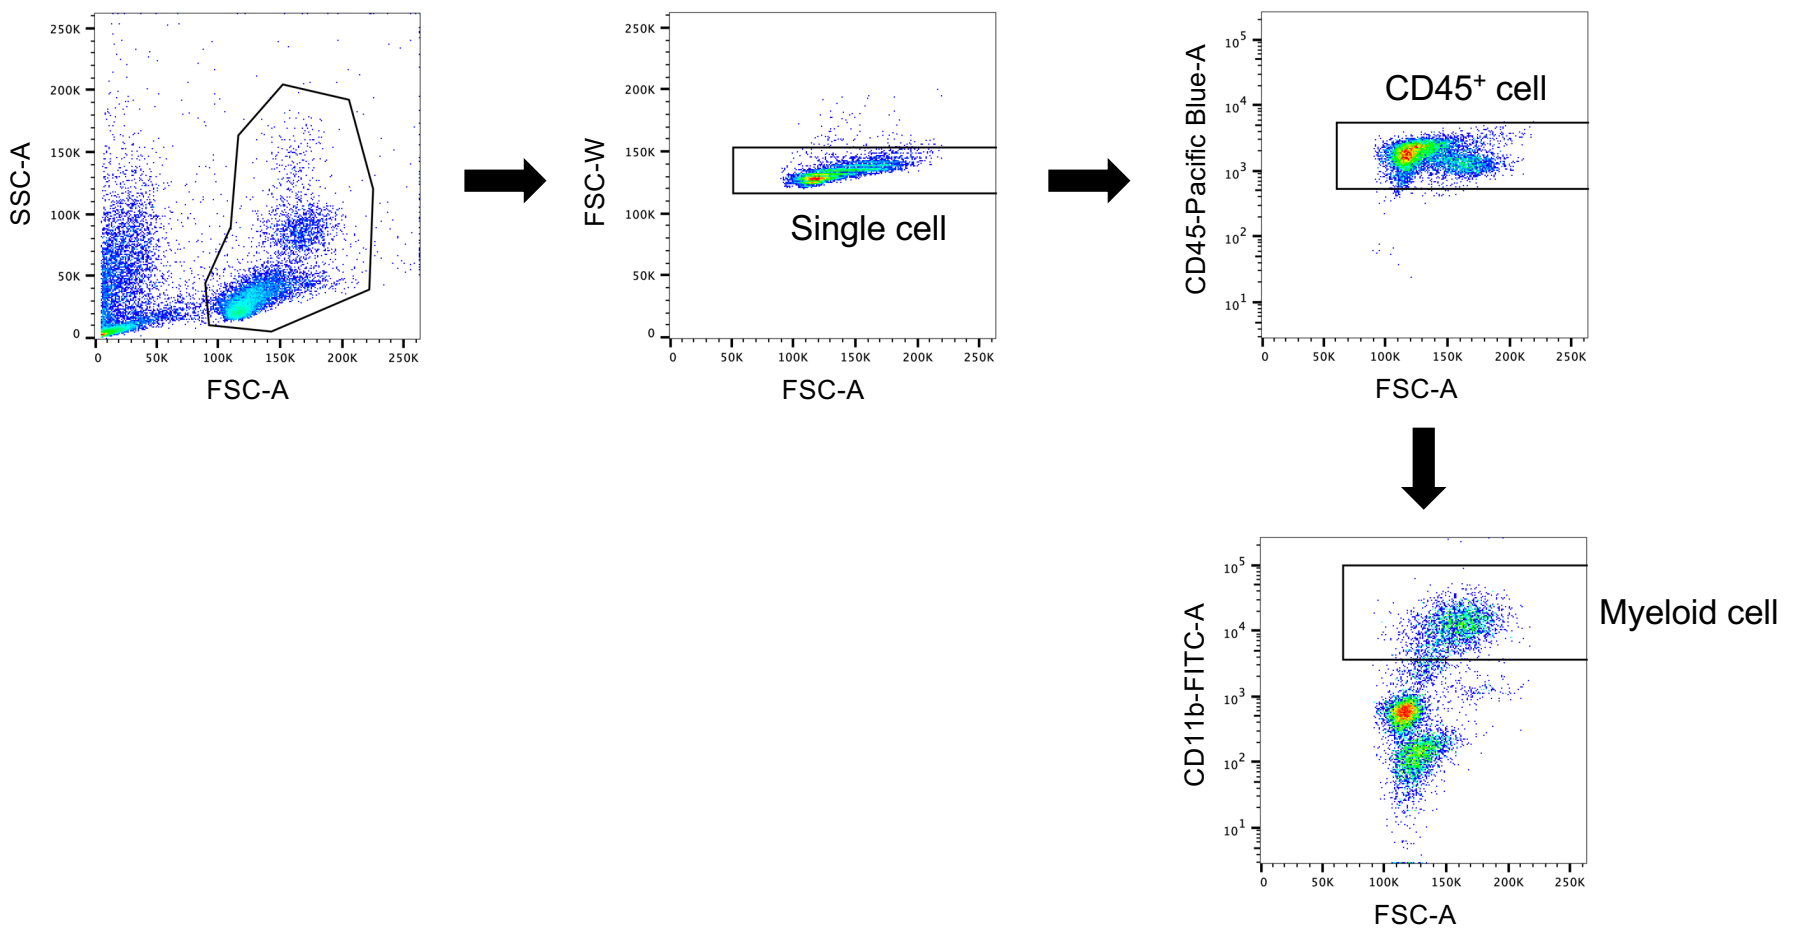**c**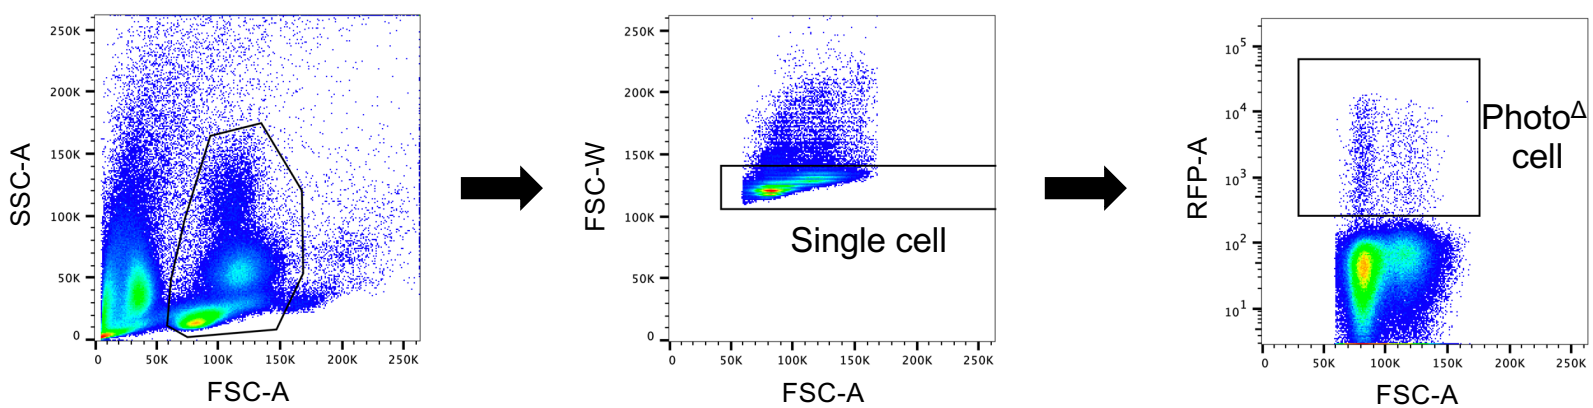

d

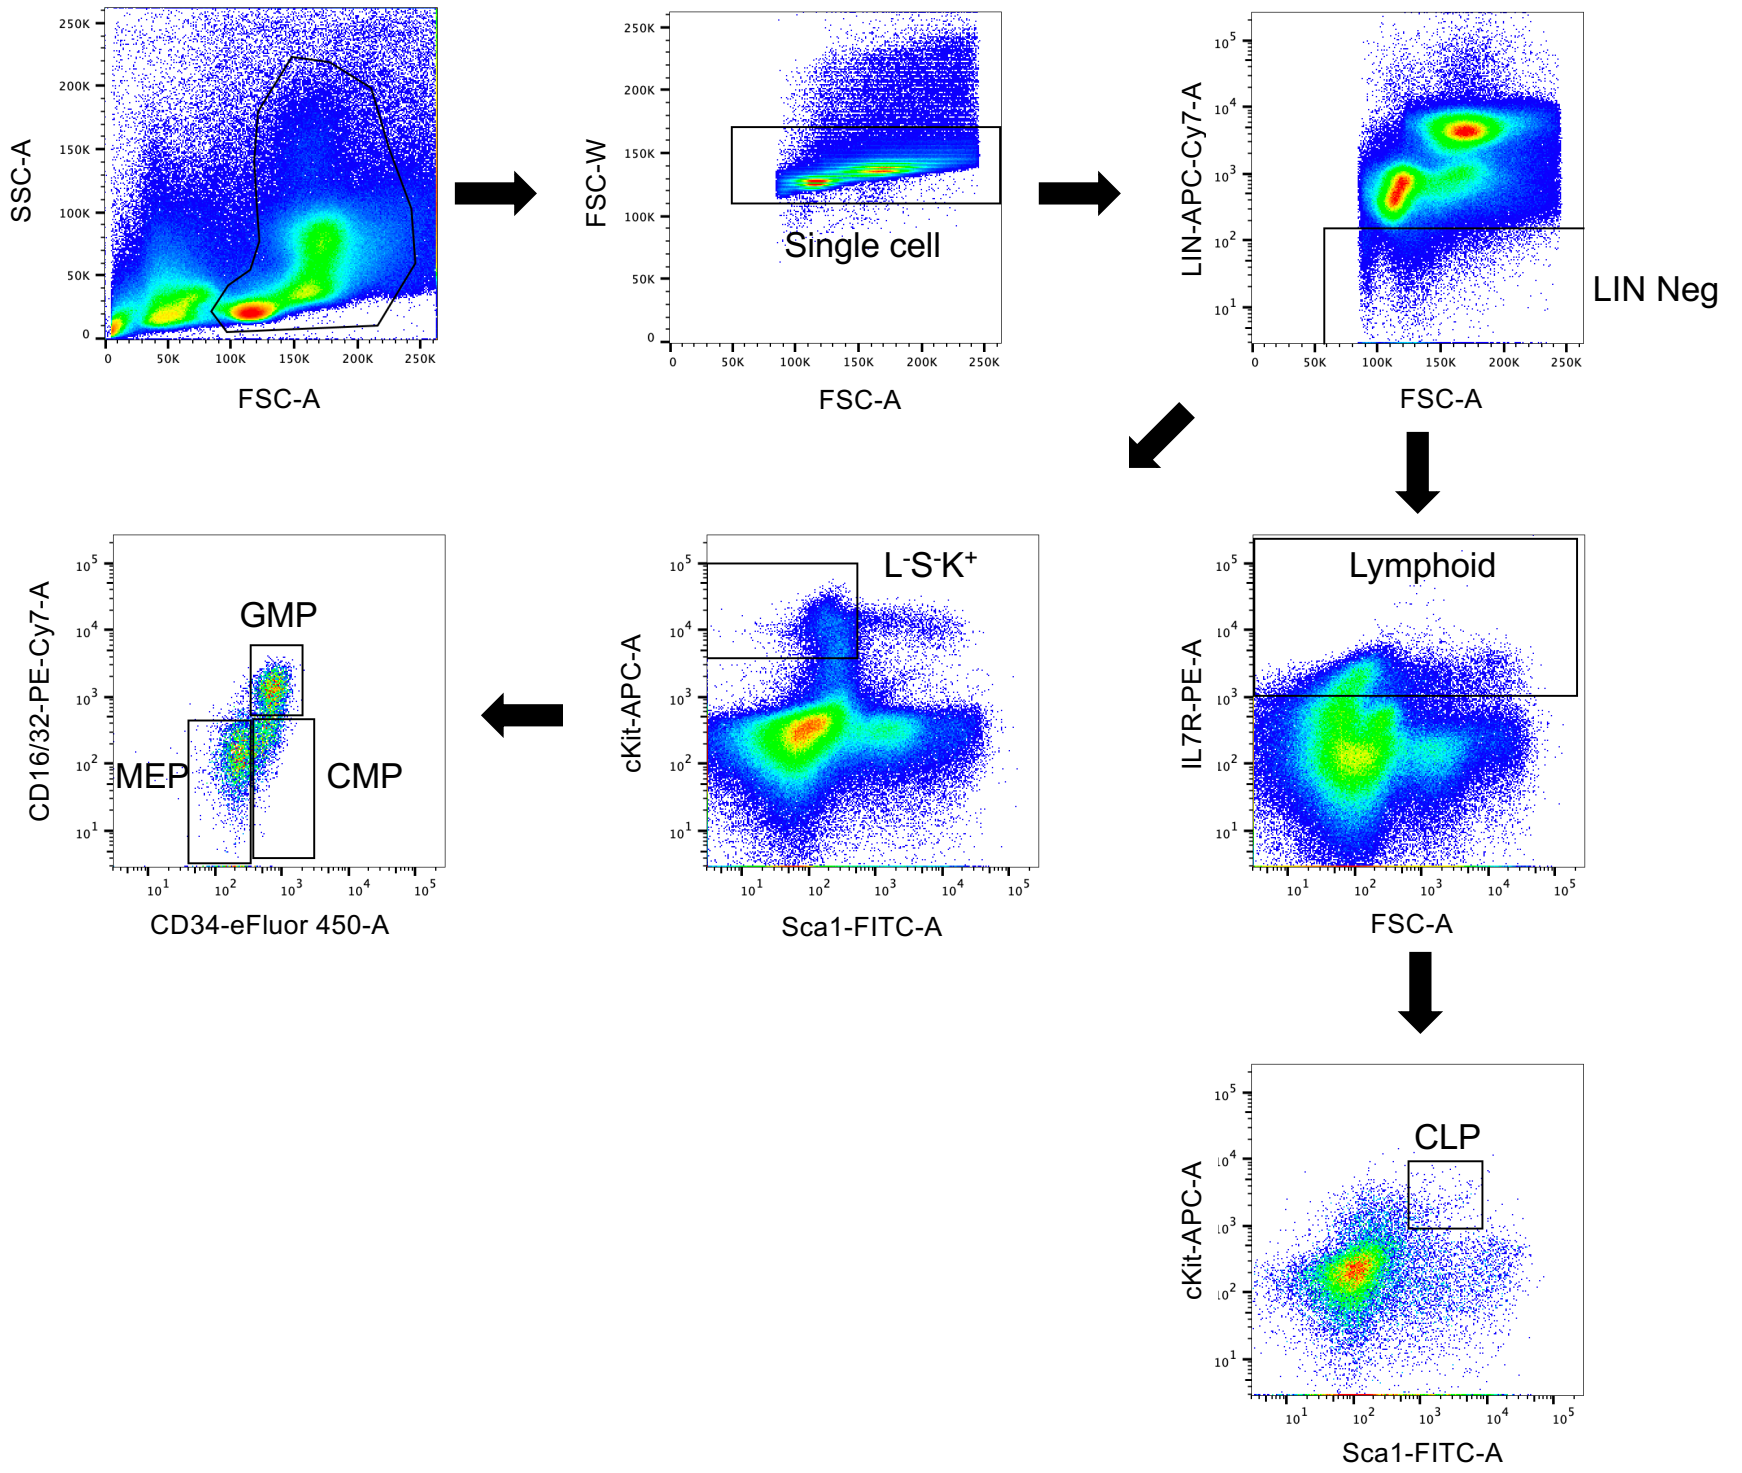

**e**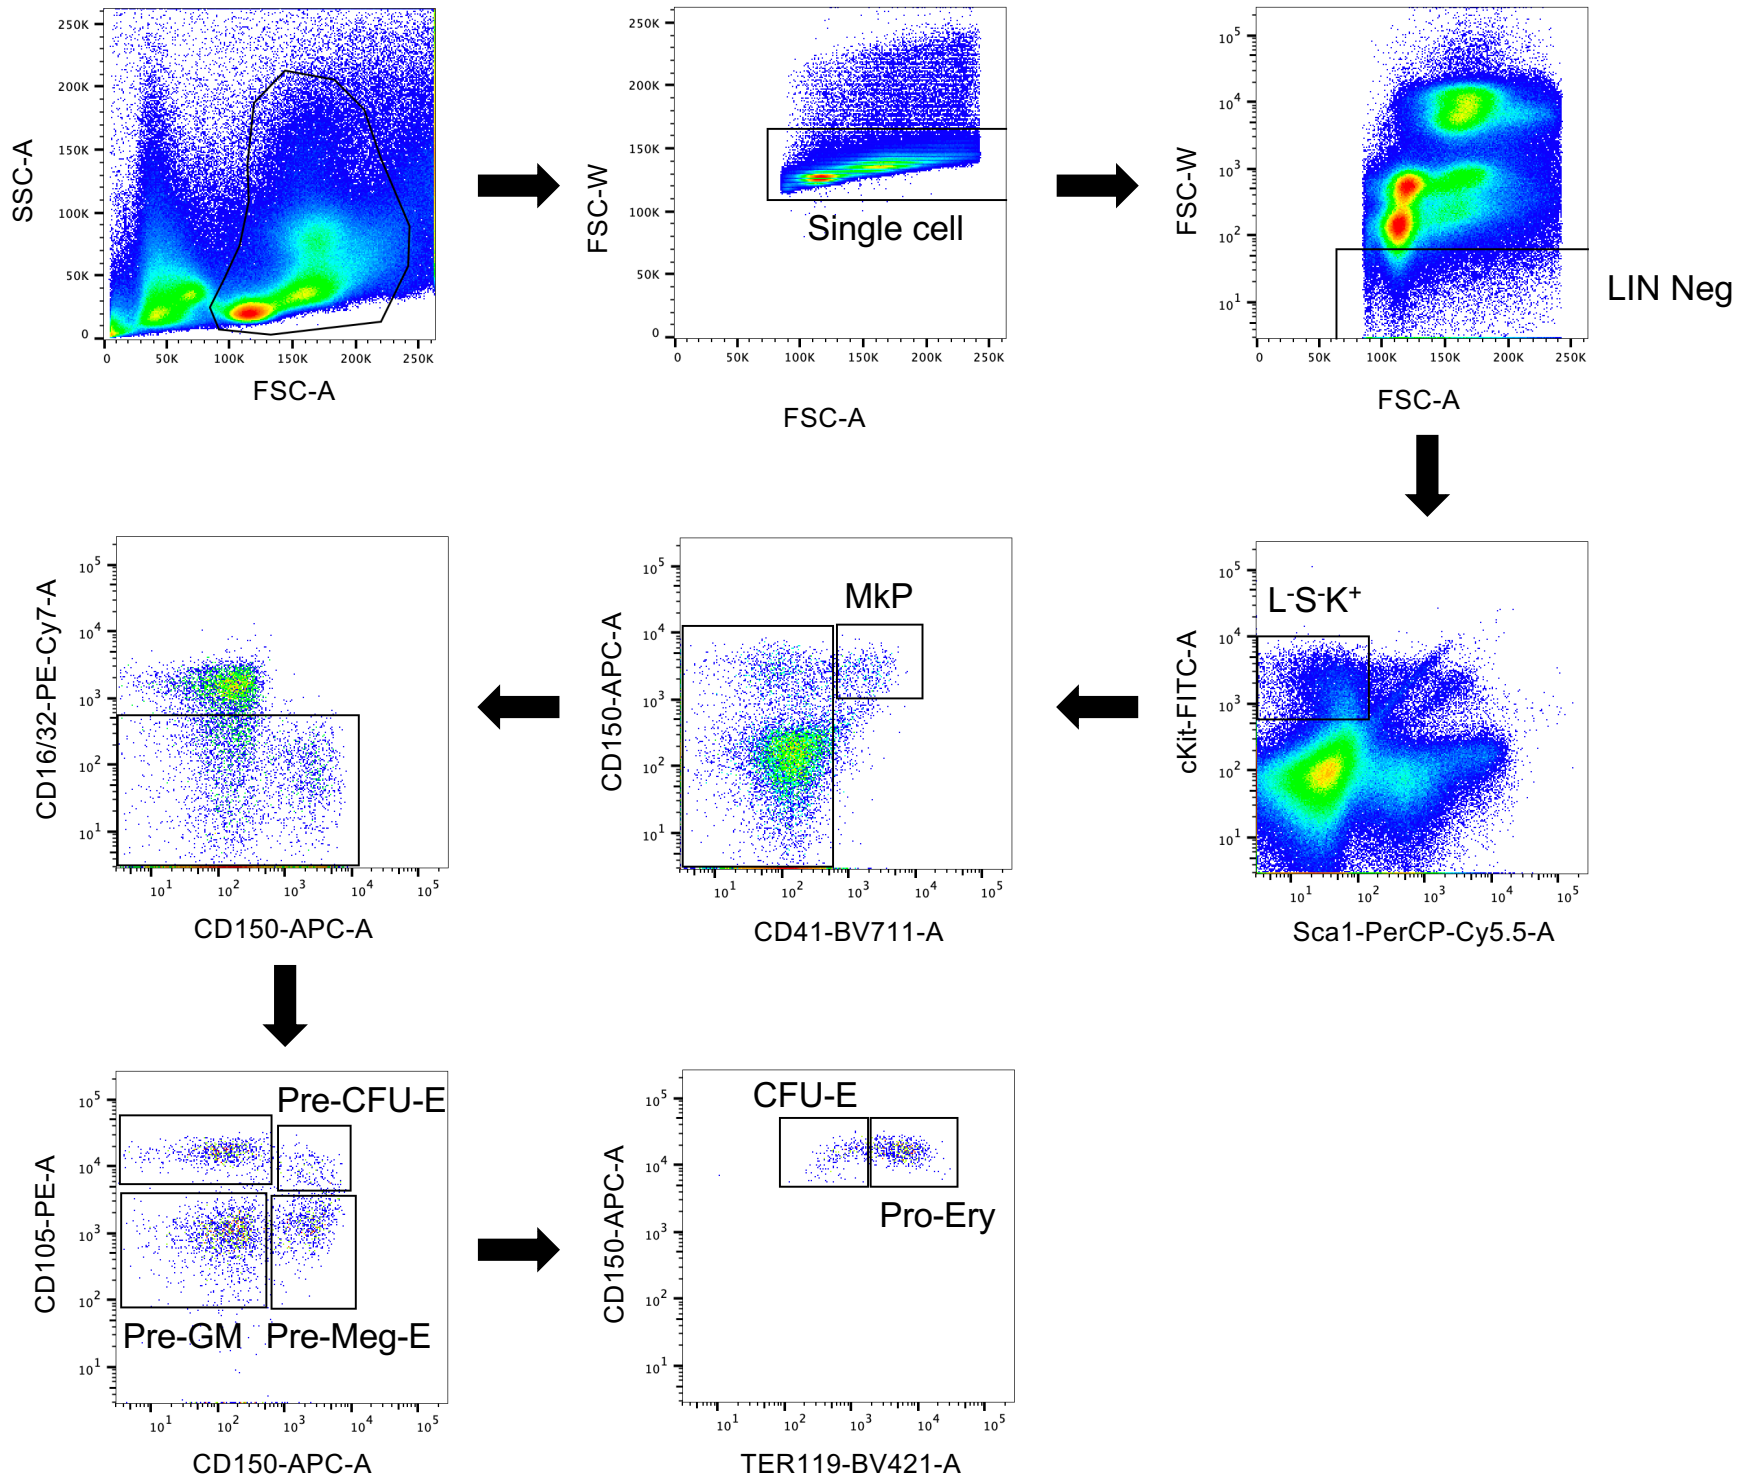**f**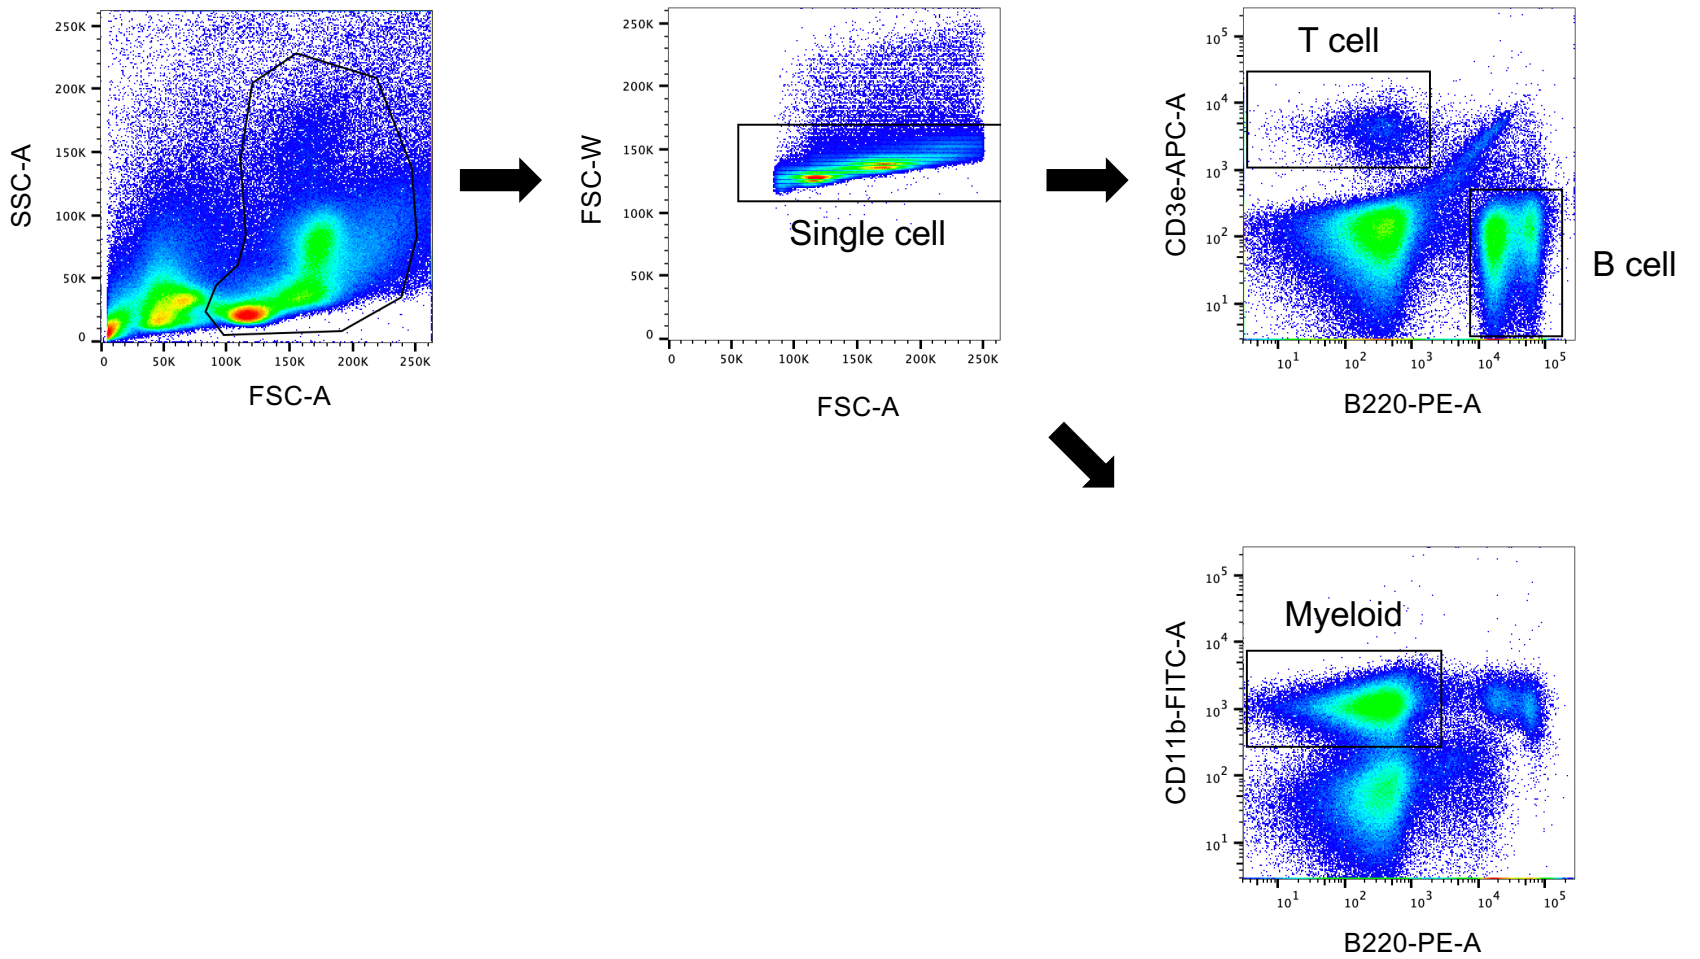

**g**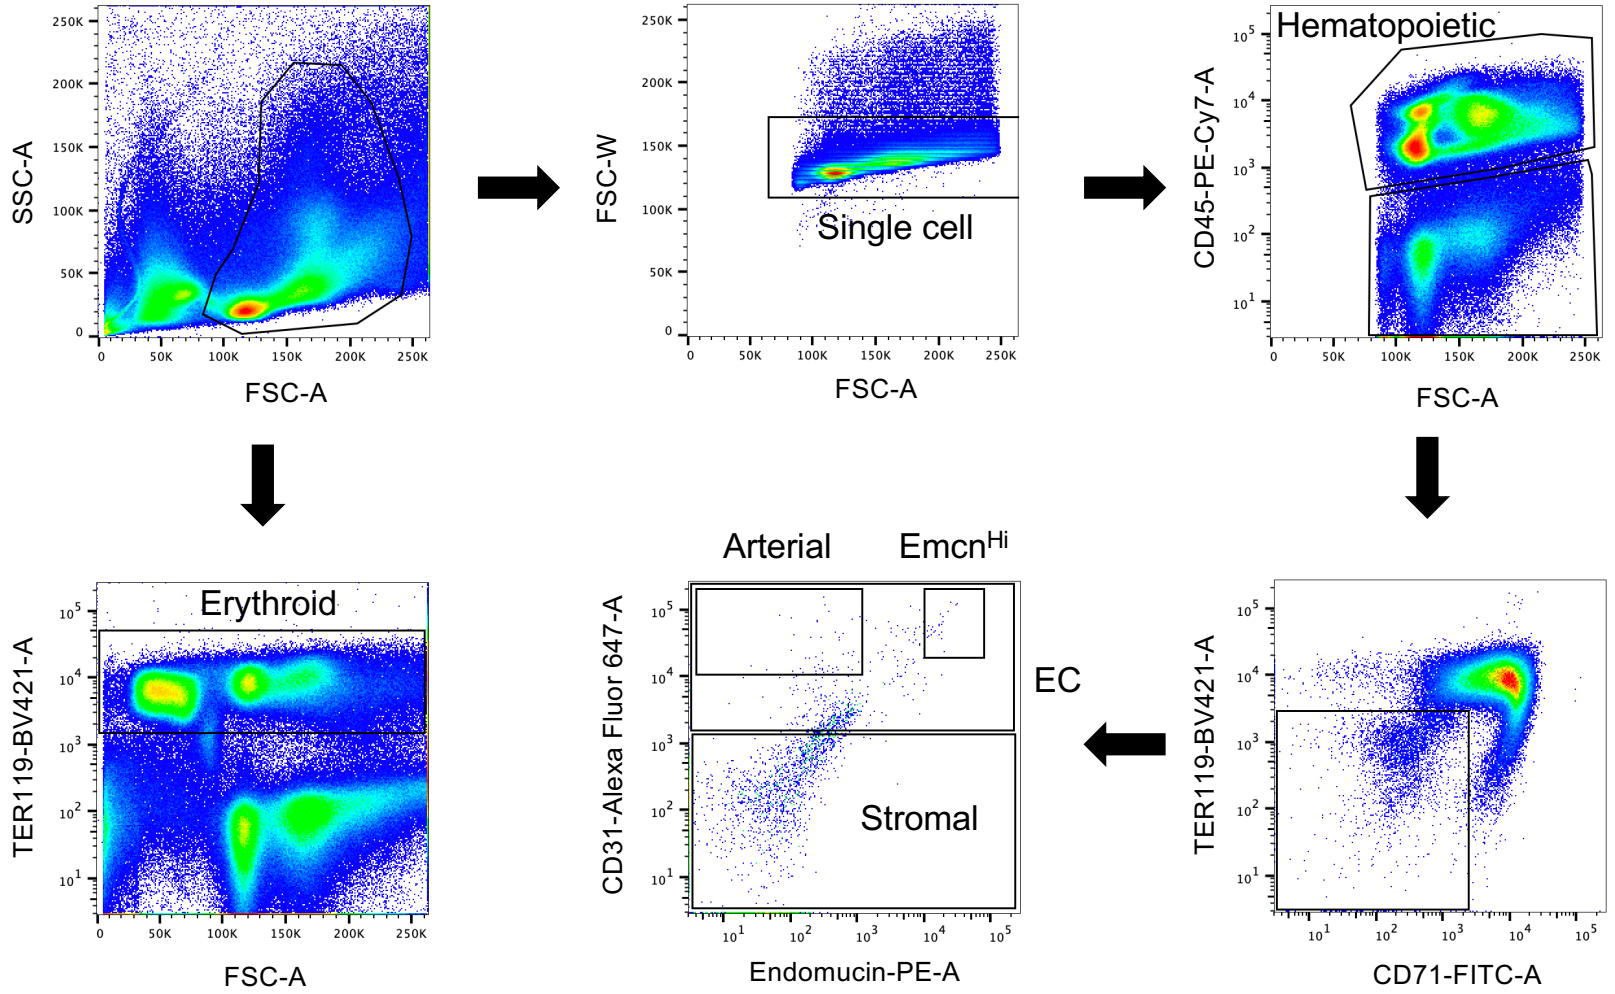**h**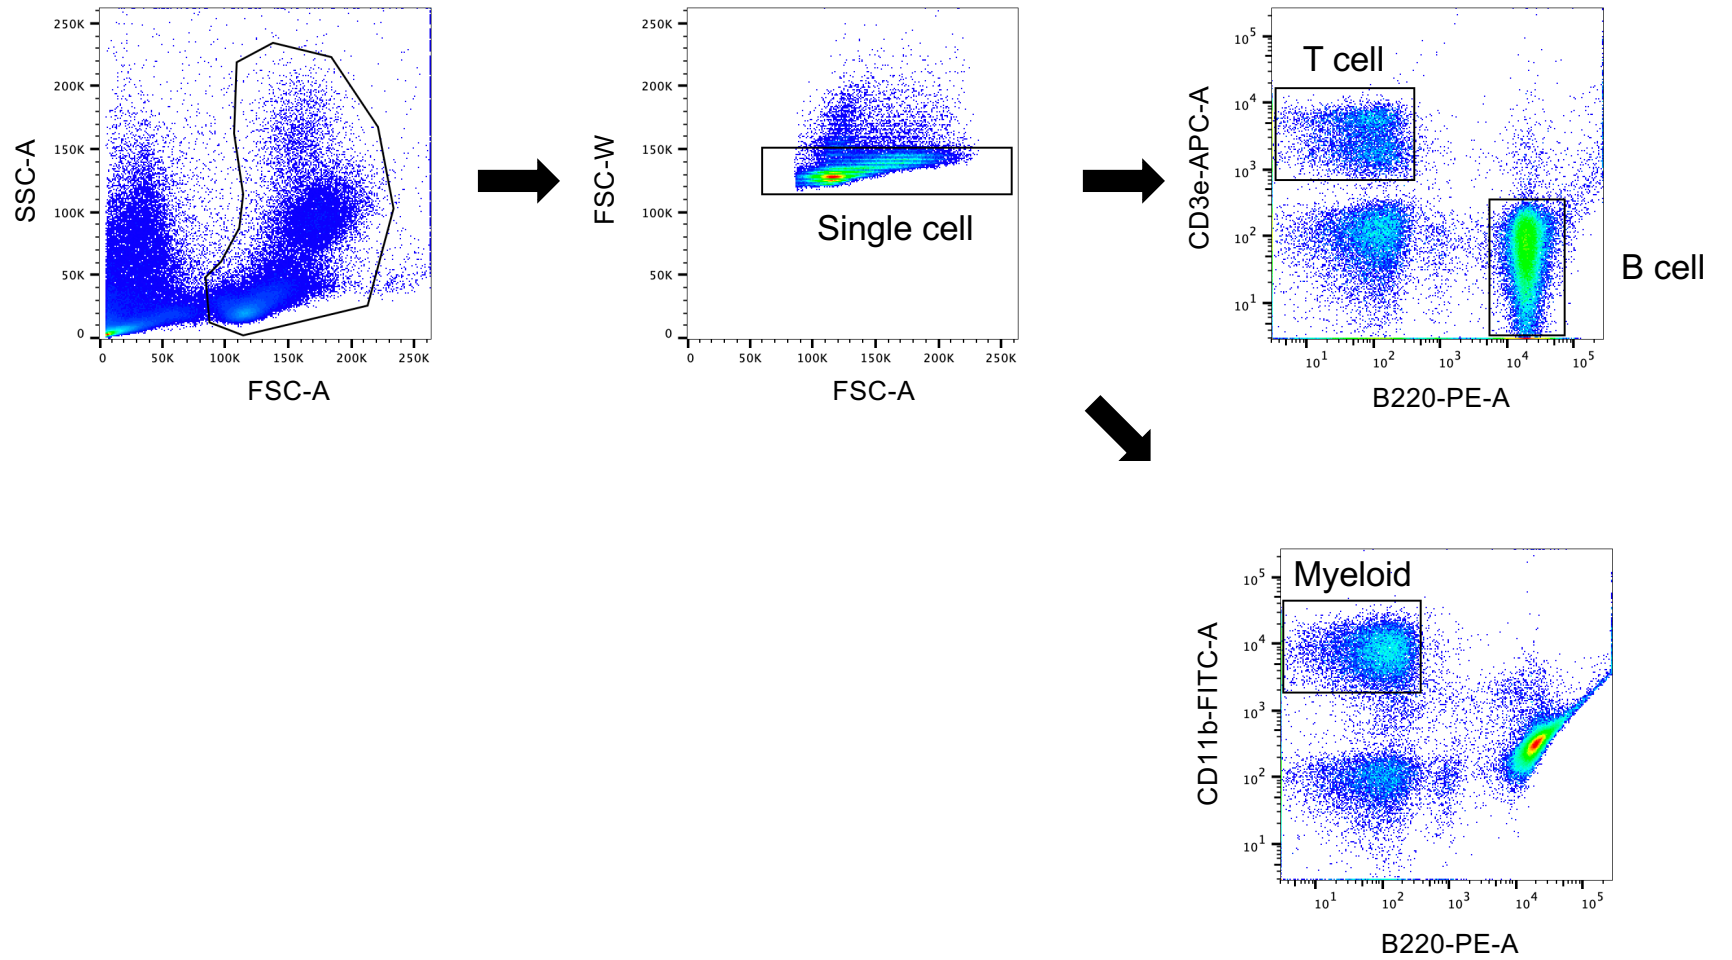

Supplement: 41586_2024_8163_MOESM3_ESM.pdf [file 41586_2024_8163_MOESM3_ESM.pdf]
